# Supplementary material for: The Dose and Duration-dependent Association between Melatonin Treatment and Overall Cognition in Alzheimer’s Dementia: A Network Meta-Analysis of Randomized Placebo-Controlled Trials
Source: PubMed Central journal article supplement — Curr Neuropharmacol. 2022 Aug 31;20(10):1816–33. doi: 10.2174/1570159X20666220420122322 (PMC9886806; doi:10.2174/1570159x20666220420122322), 2022-08-31
Supplement: CN-20-1816_SD1.pdf [file CN-20-1816_SD1.pdf]

## Supplementary Material

# The Dose and Duration-dependent Association between Melatonin Treatment and Overall Cognition in Alzheimer's Dementia: A Network Meta-Analysis of Randomized Placebo-Controlled Trials

Ping-Tao Tseng<sup>1,2,3,#</sup>, Bing-Yan Zeng<sup>4,#</sup>, Yen-Wen Chen<sup>1,#</sup>, Chun-Pai Yang<sup>5,6</sup>, Kuan-Pin Su<sup>7,8,9,10</sup>, Tien-Yu Chen<sup>11,12</sup>, Yi-Cheng Wu<sup>13</sup>, Yu-Kang Tu<sup>14,15</sup>, Pao-Yen Lin<sup>16,17</sup>, Andre F. Carvalho<sup>18</sup>, Brendon Stubbs<sup>10,19,20</sup>, Yutaka J. Matsuoka<sup>7,21</sup>, Dian-Jeng Li<sup>22</sup>, Chih-Sung Liang<sup>23,24</sup>, Chih-Wei Hsu<sup>16</sup>, Cheuk-Kwan Sun<sup>25</sup>, Yu-Shian Cheng<sup>2,26</sup>, Pin-Yang Yeh<sup>3</sup> and Yow-Ling Shiue<sup>2,\*</sup>

<sup>1</sup>Prospect Clinic for Otorhinolaryngology & Neurology, Kaohsiung, Taiwan; <sup>2</sup>Institute of Biomedical Sciences, National Sun Yat-sen University, Kaohsiung, Taiwan; <sup>3</sup>Department of Psychology, College of Medical and Health Science, Asia University, Taichung, Taiwan; <sup>4</sup>Clinical Psychology Center, Asia University Hospital, Taichung, Taiwan; <sup>5</sup>Department of Internal Medicine, E-DA Dachang Hospital, Kaohsiung, Taiwan; <sup>6</sup>Department of Neurology, Kuang Tien General Hospital, Taichung, Taiwan; <sup>7</sup>Department of Nutrition, Huangkuang University, Taichung, Taiwan; <sup>8</sup>Department of Psychiatry & Mind-Body Interface Laboratory (MBI-Lab), China Medical University Hospital, Taichung, Taiwan; <sup>9</sup>College of Medicine, China Medical University, Taichung, Taiwan; <sup>10</sup>An-Nan Hospital, China Medical University, Tainan, Taiwan; <sup>11</sup>Department of Psychological Medicine, Institute of Psychiatry, Psychology and Neuroscience, King's College London, London, UK; <sup>12</sup>Department of Psychiatry, Tri-Service General Hospital; School of Medicine, National Defense Medical Center, Taipei, Taiwan; <sup>13</sup>Institute of Brain Science, National Yang Ming Chiao Tung University, Taipei 112, Taiwan; <sup>14</sup>Department of Sports Medicine, Landseed International Hospital, Taoyuan, Taiwan; <sup>15</sup>Institute of Epidemiology & Preventive Medicine, College of Public Health, National Taiwan University, Taipei, Taiwan; <sup>16</sup>Department of Dentistry, National Taiwan University Hospital, Taipei, Taiwan; <sup>17</sup>Department of Psychiatry, Kaohsiung Chang Gung Memorial Hospital and Chang Gung University College of Medicine, Kaohsiung, Taiwan; <sup>18</sup>Institute for Translational Research in Biomedical Sciences, Kaohsiung Chang Gung Memorial Hospital, Kaohsiung, Taiwan; <sup>19</sup>Innovation in Mental and Physical Health and Clinical Treatment (IMPACT) Strategic Research Centre, School of Medicine, Barwon Health, Deakin University, Geelong, VIC, Australia; <sup>20</sup>Physiotherapy Department, South London and Maudsley NHS Foundation Trust, London, UK; <sup>21</sup>Faculty of Health, Social Care Medicine and Education, Anglia Ruskin University, Chelmsford, UK; <sup>22</sup>Former Division Chief of Health Care Research, National Cancer Center, Japan; <sup>23</sup>Department of Addiction Science, Kaohsiung Municipal Kai-Syuan Psychiatric Hospital, Kaohsiung City, Taiwan; <sup>24</sup>Department of Psychiatry, Beitou Branch, Tri-Service General Hospital; School of Medicine, National Defense Medical Center, Taipei, Taiwan; <sup>25</sup>Graduate Institute of Medical Sciences, National Defense Medical Center, Taipei, Taiwan; <sup>26</sup>Department of Emergency Medicine, E-Da Hospital, I-Shou University School of Medicine for International Students; <sup>26</sup>Department of Psychiatry, Tsyur-Huey Mental Hospital, Kaohsiung Jen-Ai's Home, Taiwan

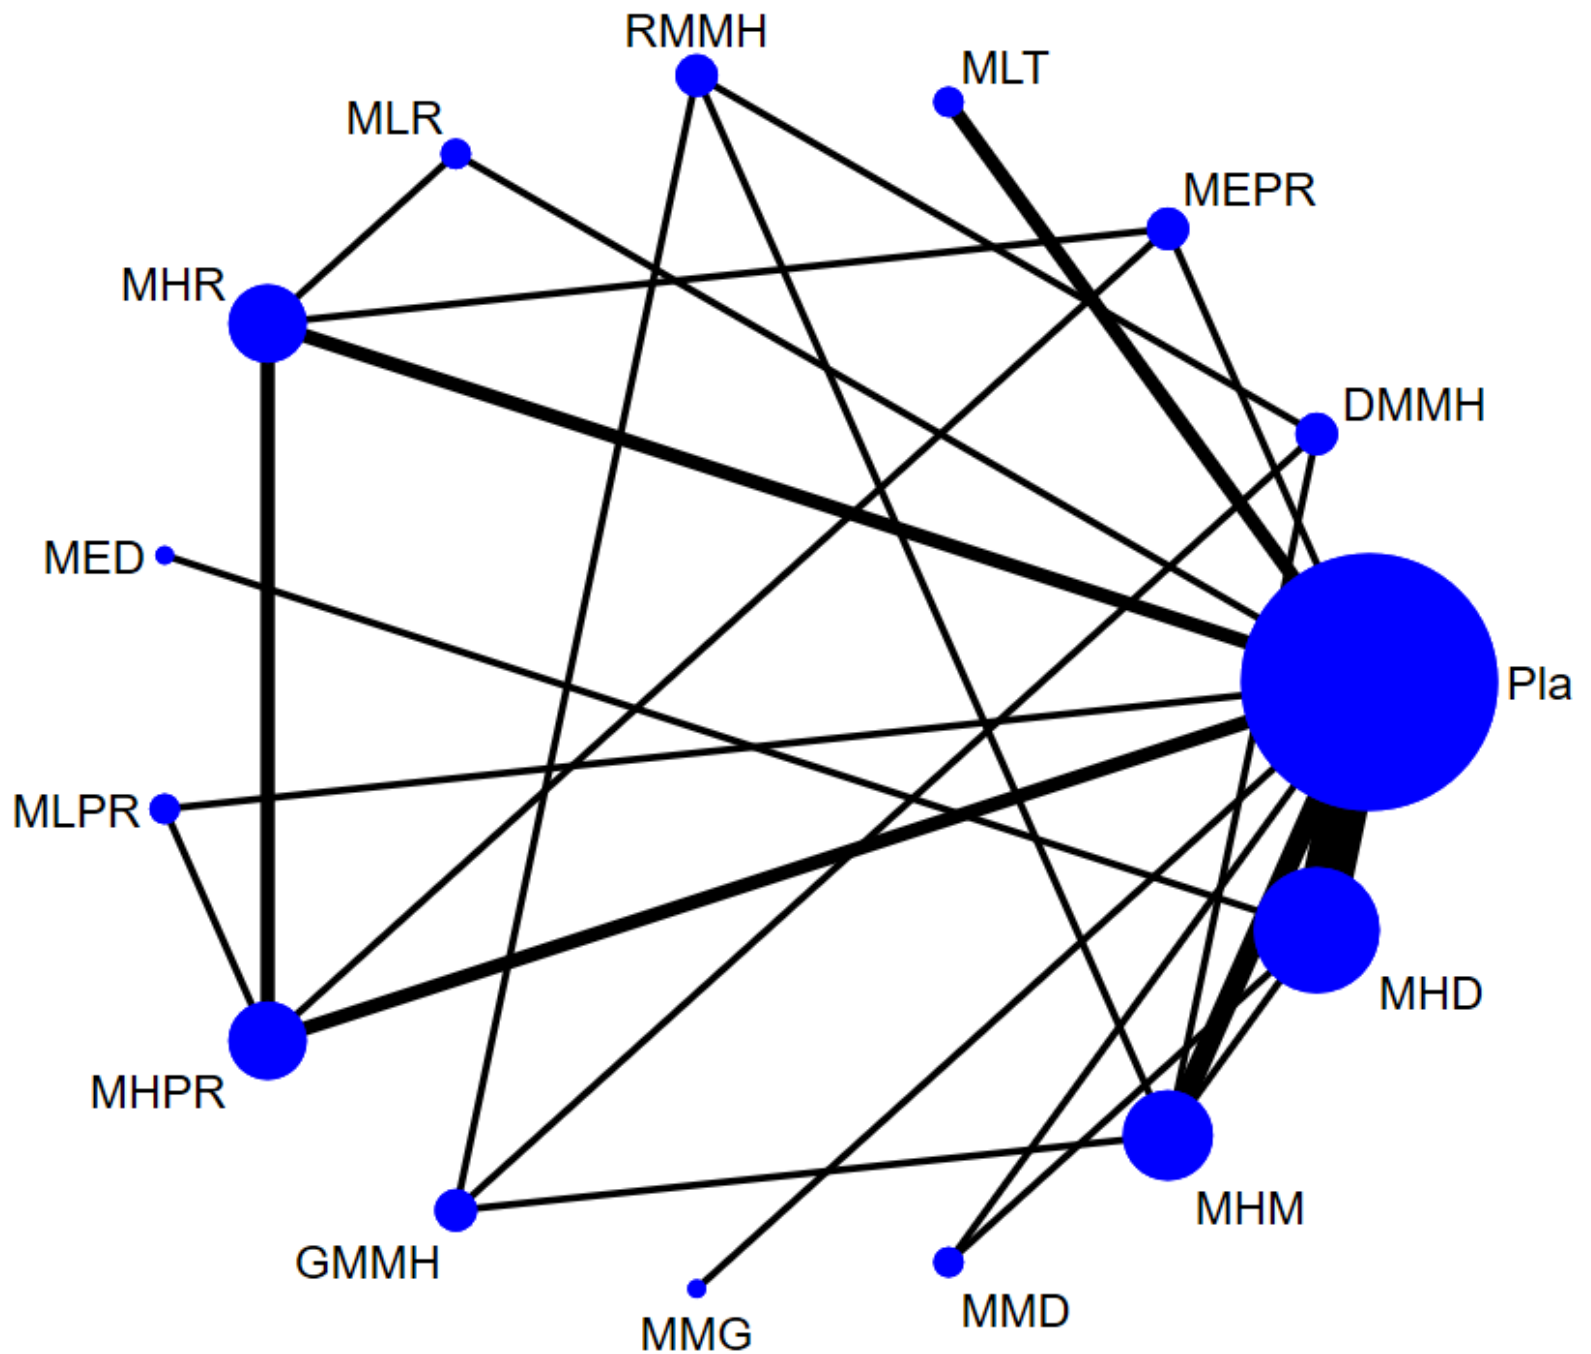

**eFigure 1A network structure of NMA of cognition change: subgroup of medium-term treatment duration**

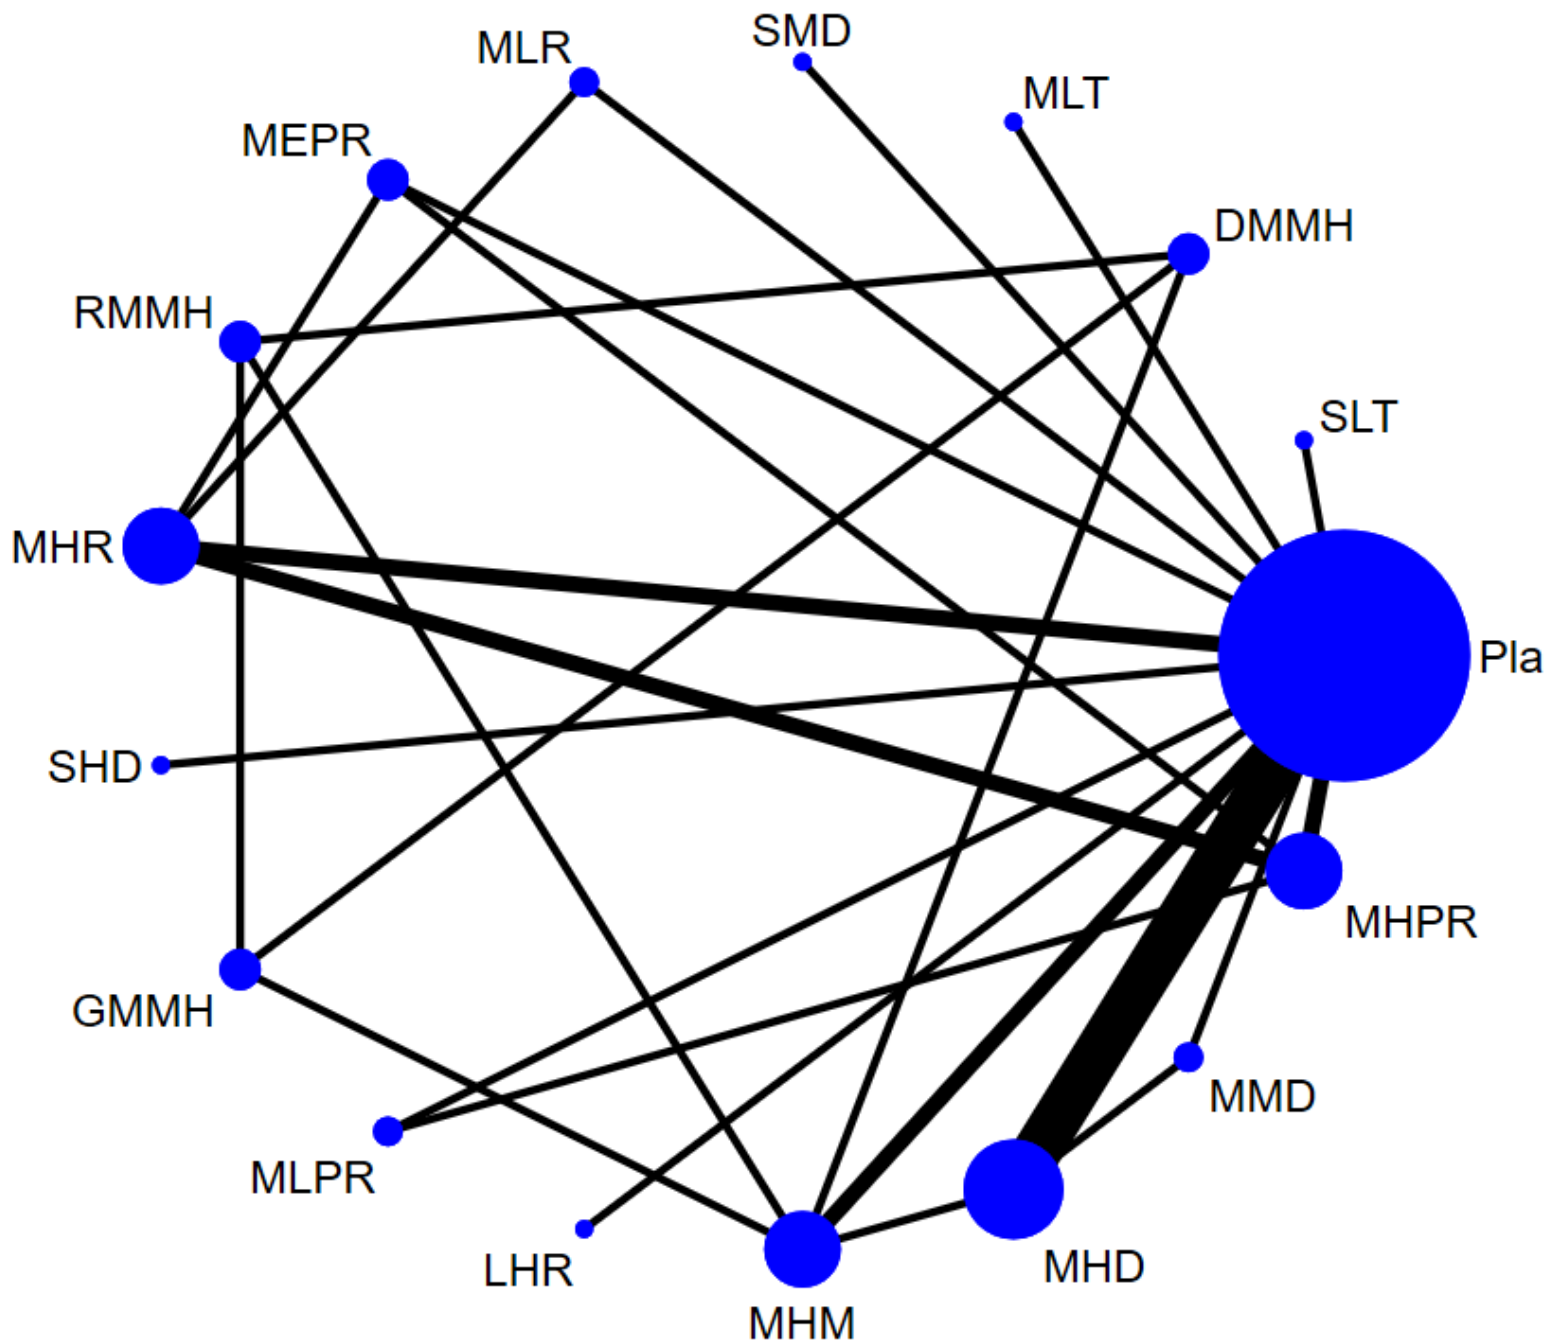

**eFigure 1B network structure of NMA of cognition change: subgroup of exclude concomitant Mx**

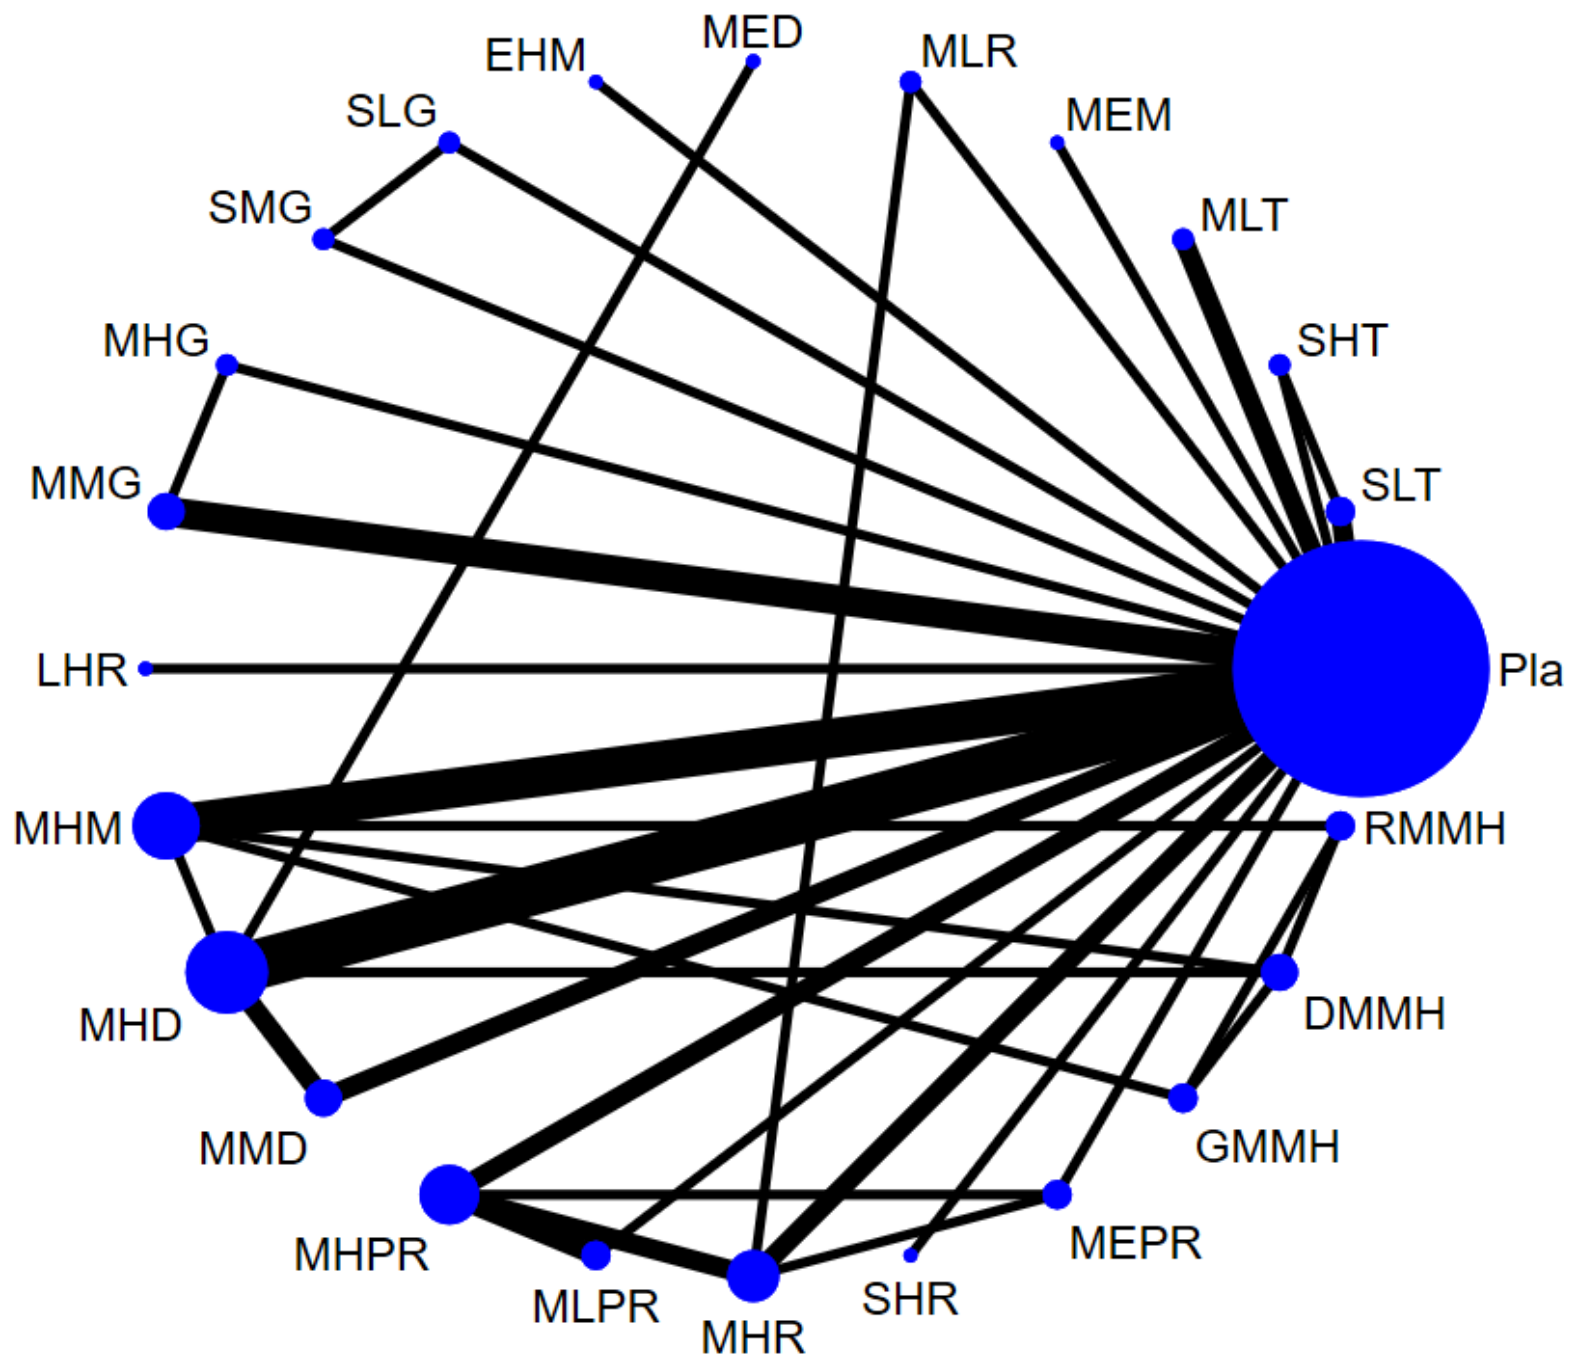

eFigure 1C network structure of NMA of quality of life change

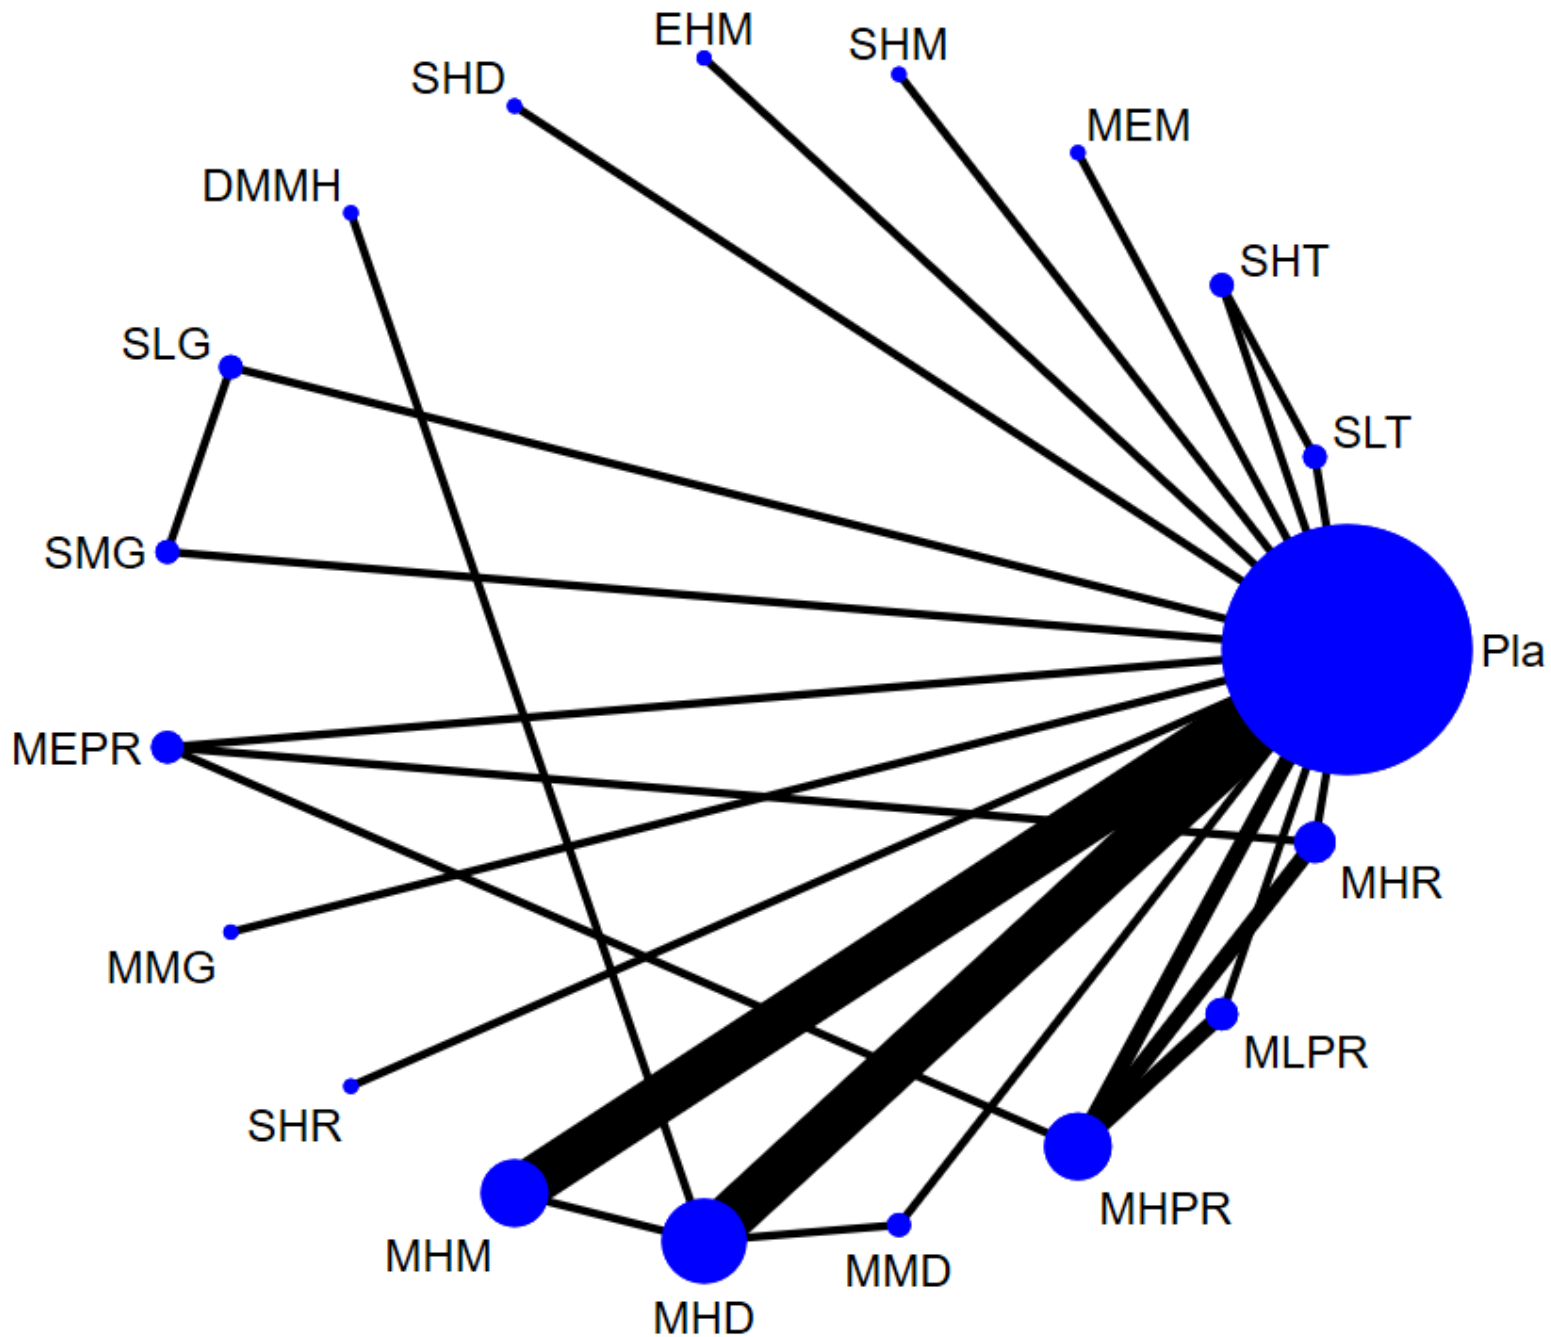

**eFigure 1D network structure of NMA of changes of behavioral disturbance**

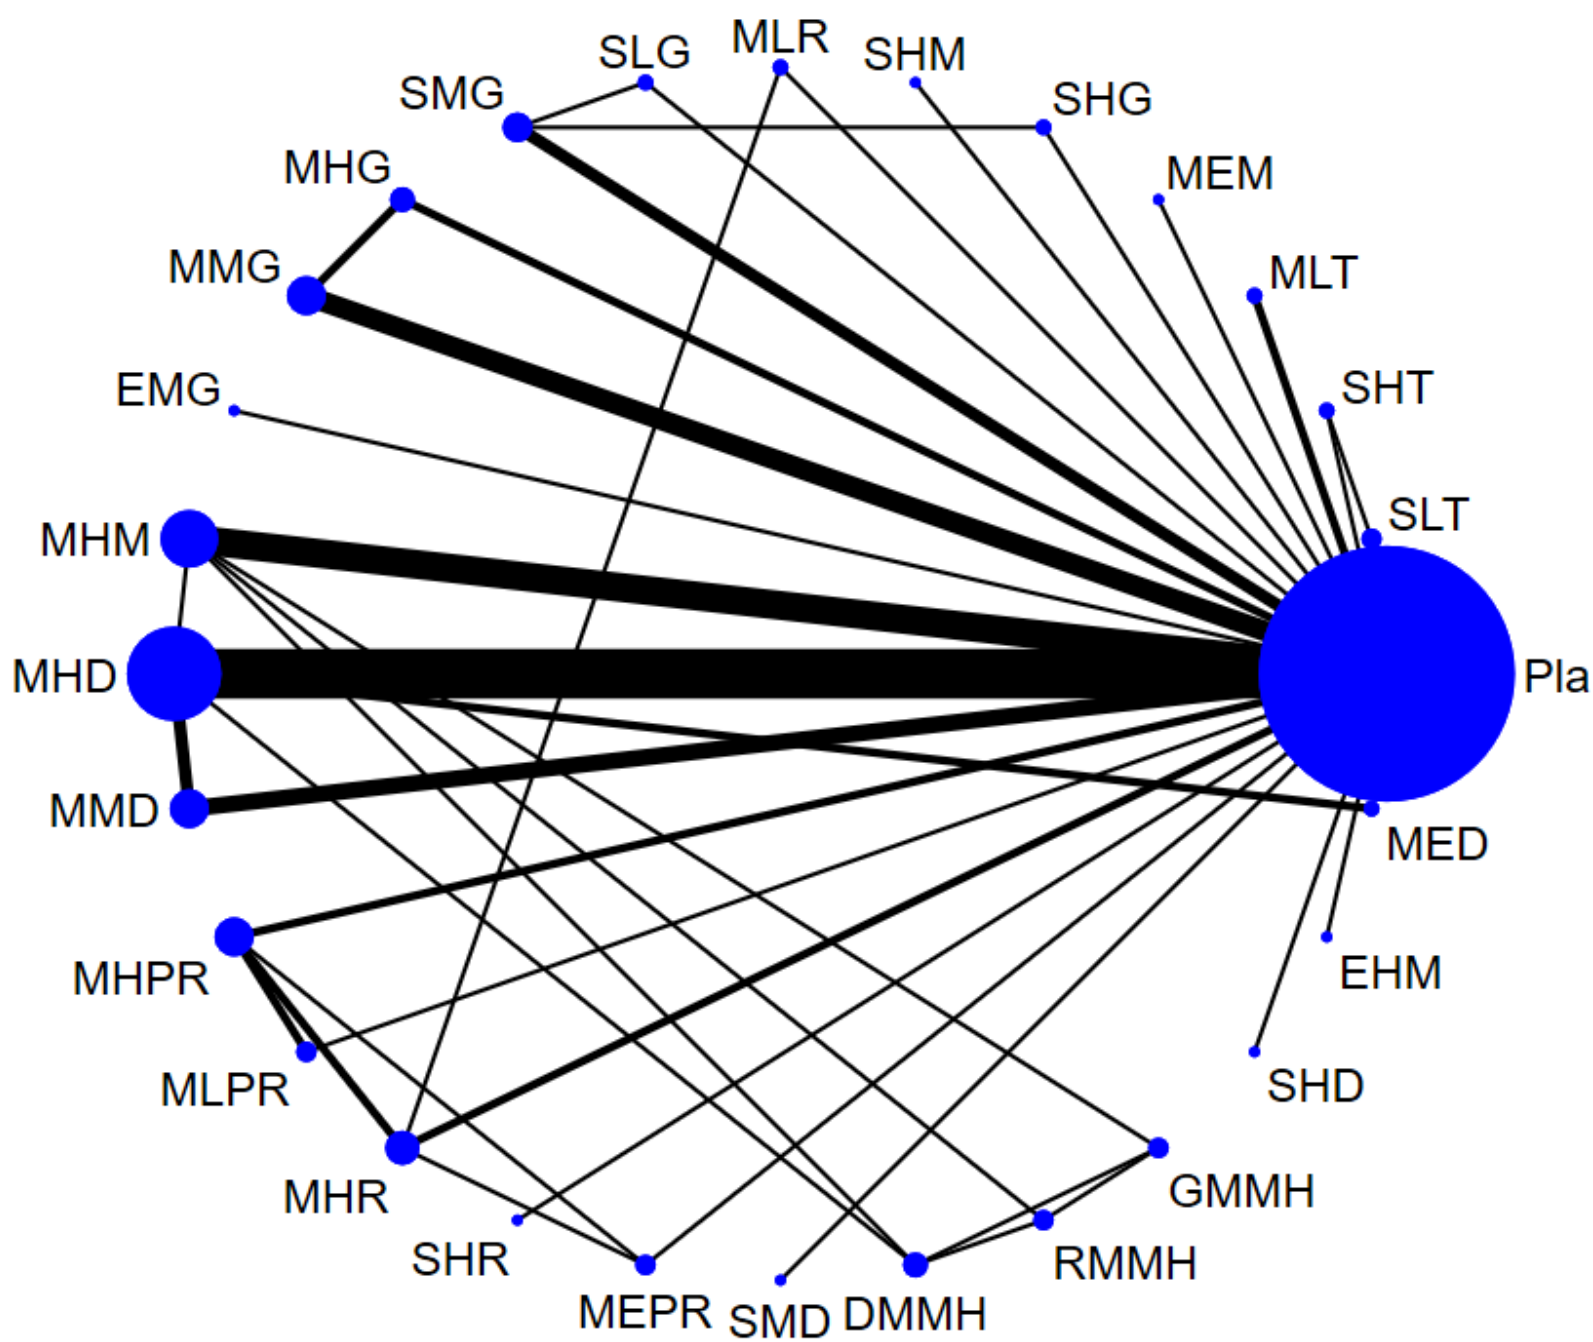

eFigure 1E network structure of NMA of drop-out rate

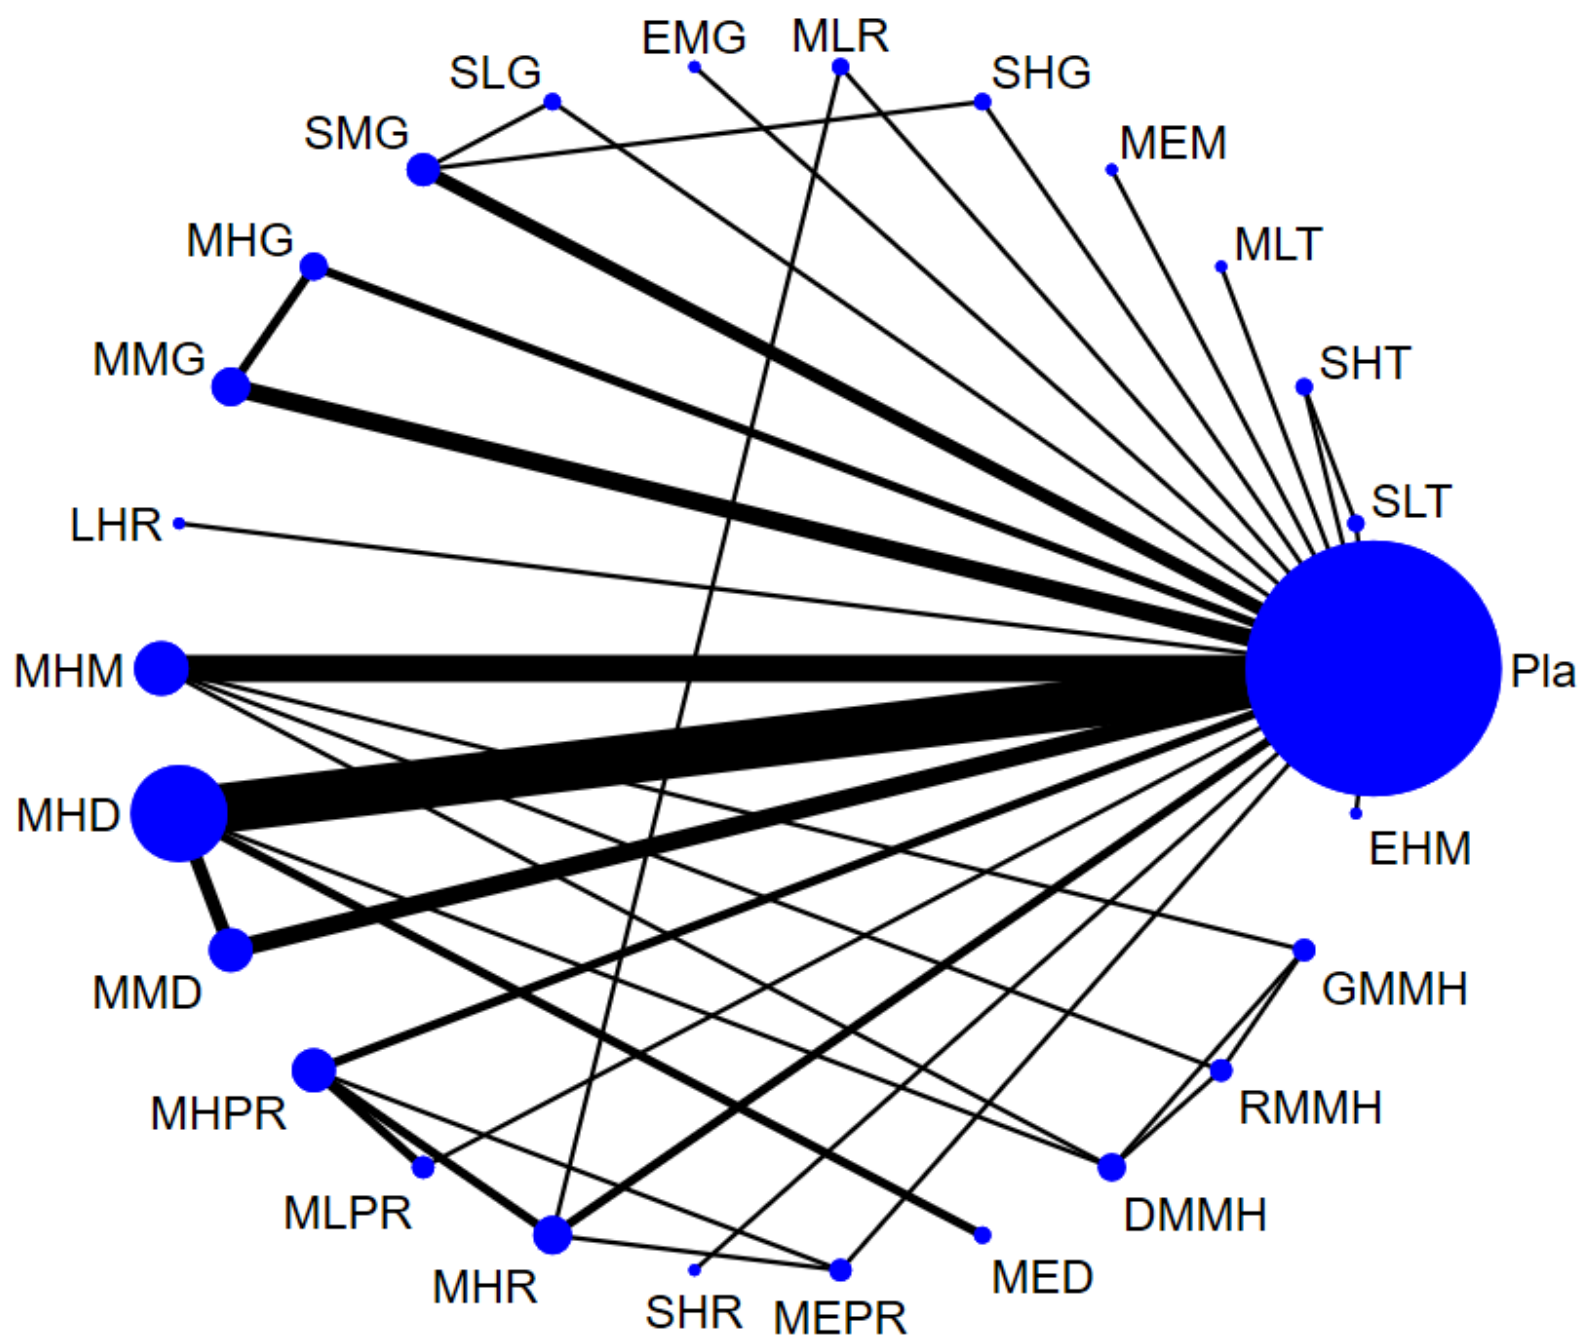

**eFigure 1F network structure of NMA of rate of any adverse event reported**

# Figure legend of eFigure 1A-1F

The lines between nodes represent direct comparisons in various trials, and the size of each circle is proportional to the size of the population involved in each specific treatment. The thickness of the lines is proportional to the number of trials connected to the network.

Abbreviation: CI: confidence interval; DMMH: medium-term high dose memantine plus high dose donepezil; EHM: extreme-long-term high dose memantine; EMG: extreme-long-term medium dose galantamine; ES: effect size; GMMH: medium-term high dose memantine plus low dose galantamine; LHR: long-term high dose rivastigmine; LLT: long-term low dose melatonin; MA: meta-analysis; MD: mean difference; MED: medium-term extreme high dose donepezil; MEM: medium-term extreme high dose memantine; MEPR: medium-term extreme high dose rivastigmine patch; MHD: medium-term high dose donepezil; MHG: medium-term high dose galantamine; MHM: medium-term high dose memantine; MHPR: medium-term high dose rivastigmine patch; MHR: medium-term high dose rivastigmine; MLPR: medium-term low dose rivastigmine patch; MLR: medium-term low dose rivastigmine; MLT: medium-term low dose melatonin; MMD: medium-term donepezil medium dose; MMG: medium-term medium dose galantamine; MMSE: mini-mental status examination; NMA: network meta-analysis; OR: odds ratio; Pla: Placebo; PRISMA: preferred reporting items for systematic reviews and meta-analyses; RCT: randomized controlled trial; RMMH: medium-term high dose memantine plus medium dose rivastigmine; SHD: short-term high dose donepezil; SHG: short-term high dose galantamine; SHM: short-term high dose memantine; SHR: short-term high dose rivastigmine; SHT: short-term high dose melatonin; SLG: short-term low dose galantamine; SLT: short-term low dose melatonin; SMD: short-term medium dose donepezil; SMG: short-term medium dose galantamine; SMT: short-term medium dose melatonin; StMD: standardized mean difference; SUCRA: surface under the cumulative ranking curve



# Cognition measured by MMSE (medium-term treatment)

Reference treatment: Pla

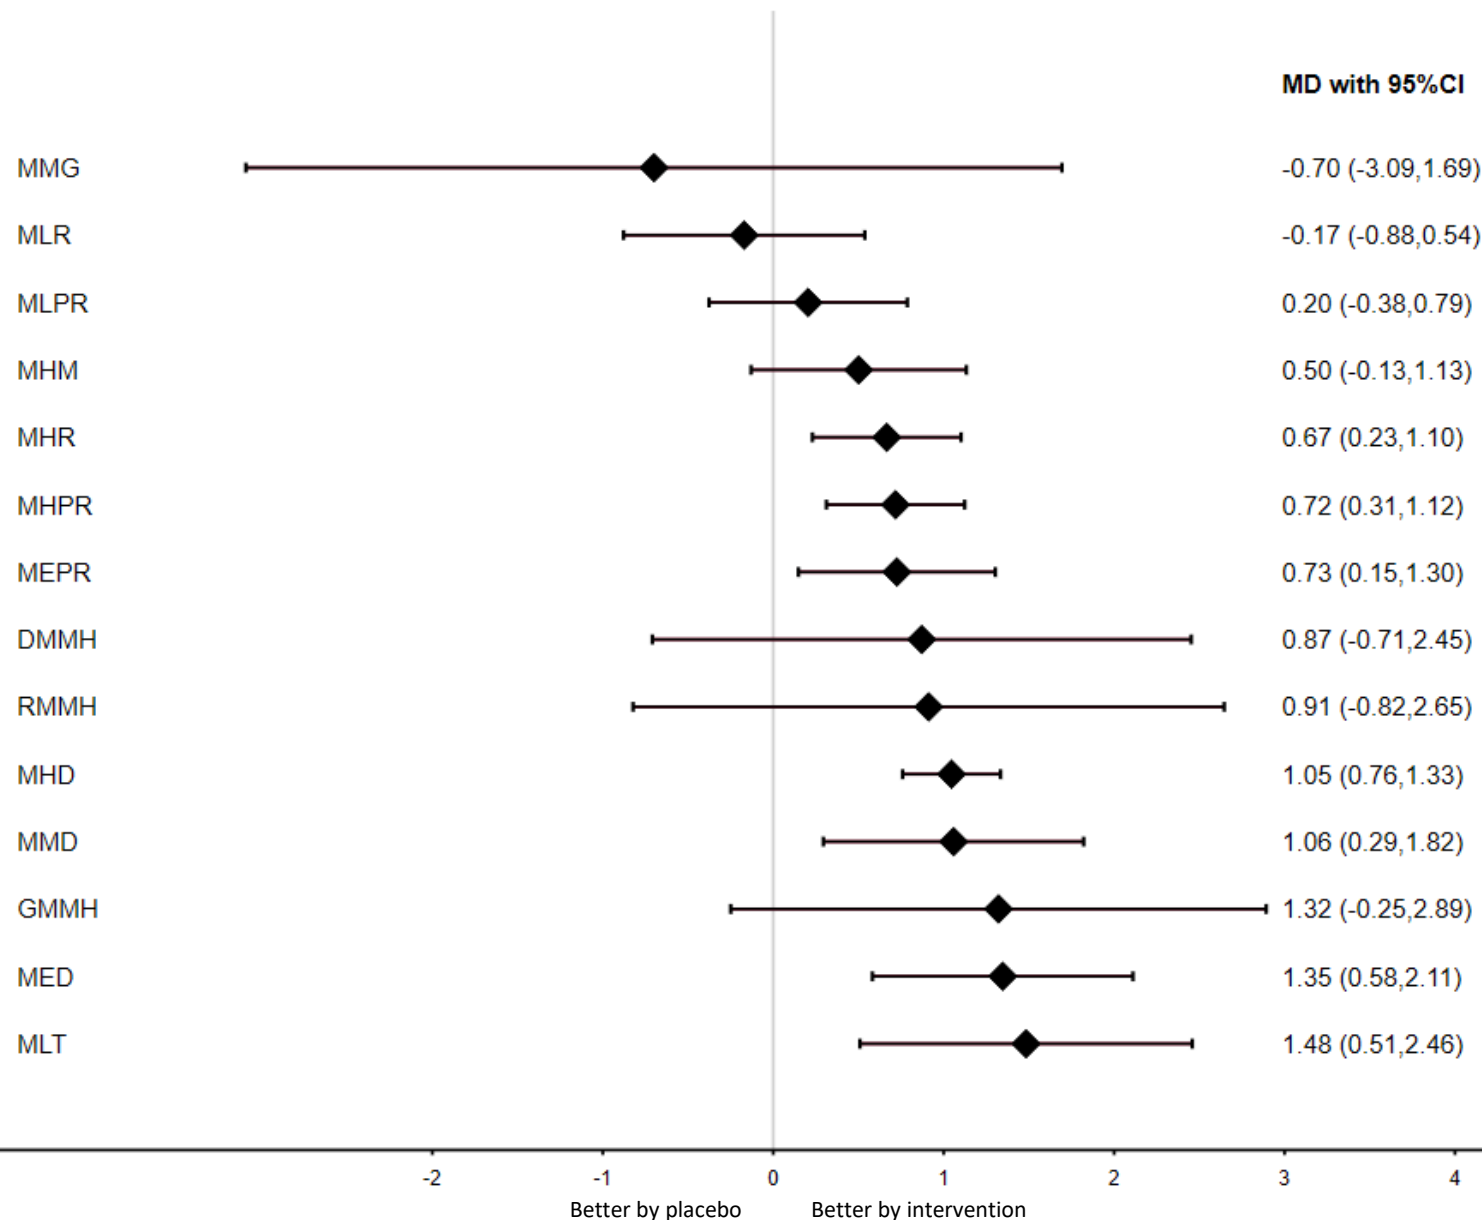

Figure 2A forest plot of NMA of cognition change: subgroup of medium-term treatment duration

# Cognition measured by MMSE (exclude concomitant Mx)

Reference treatment: Pla

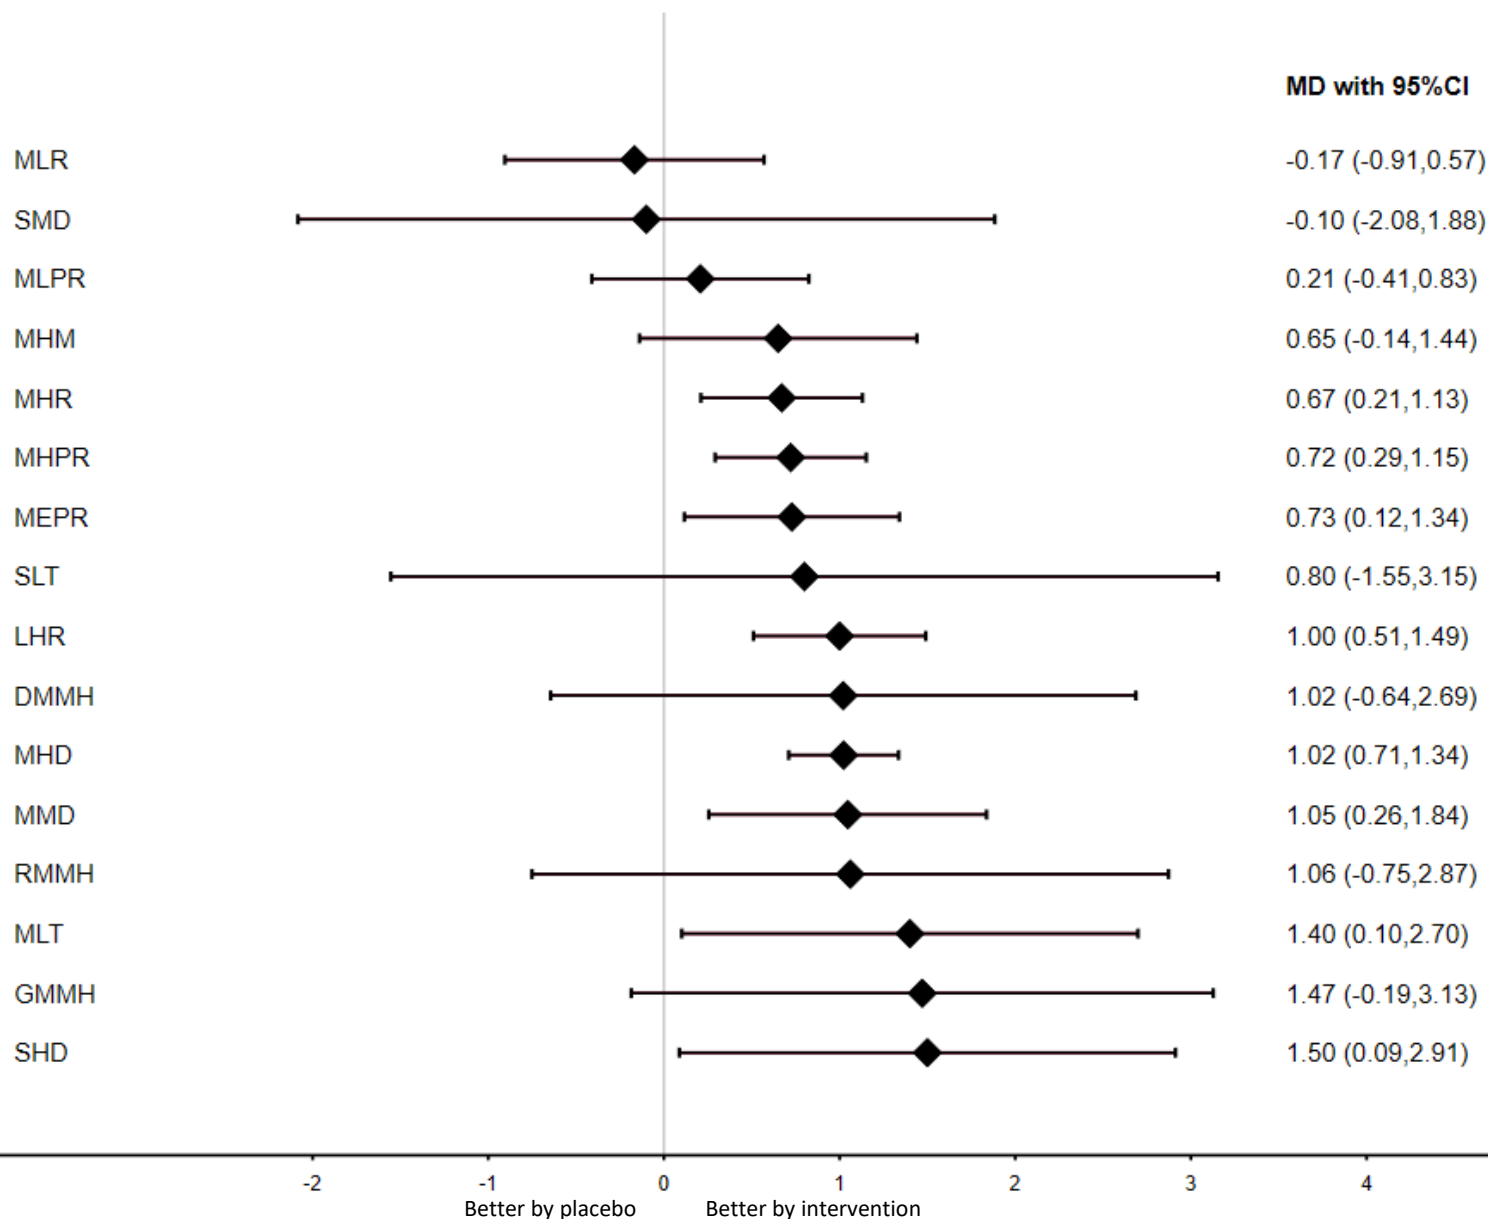

eFigure 2B forest plot of NMA of cognition change: subgroup of exclude concomitant Mx

# Quality of life

## Reference treatment: Pla

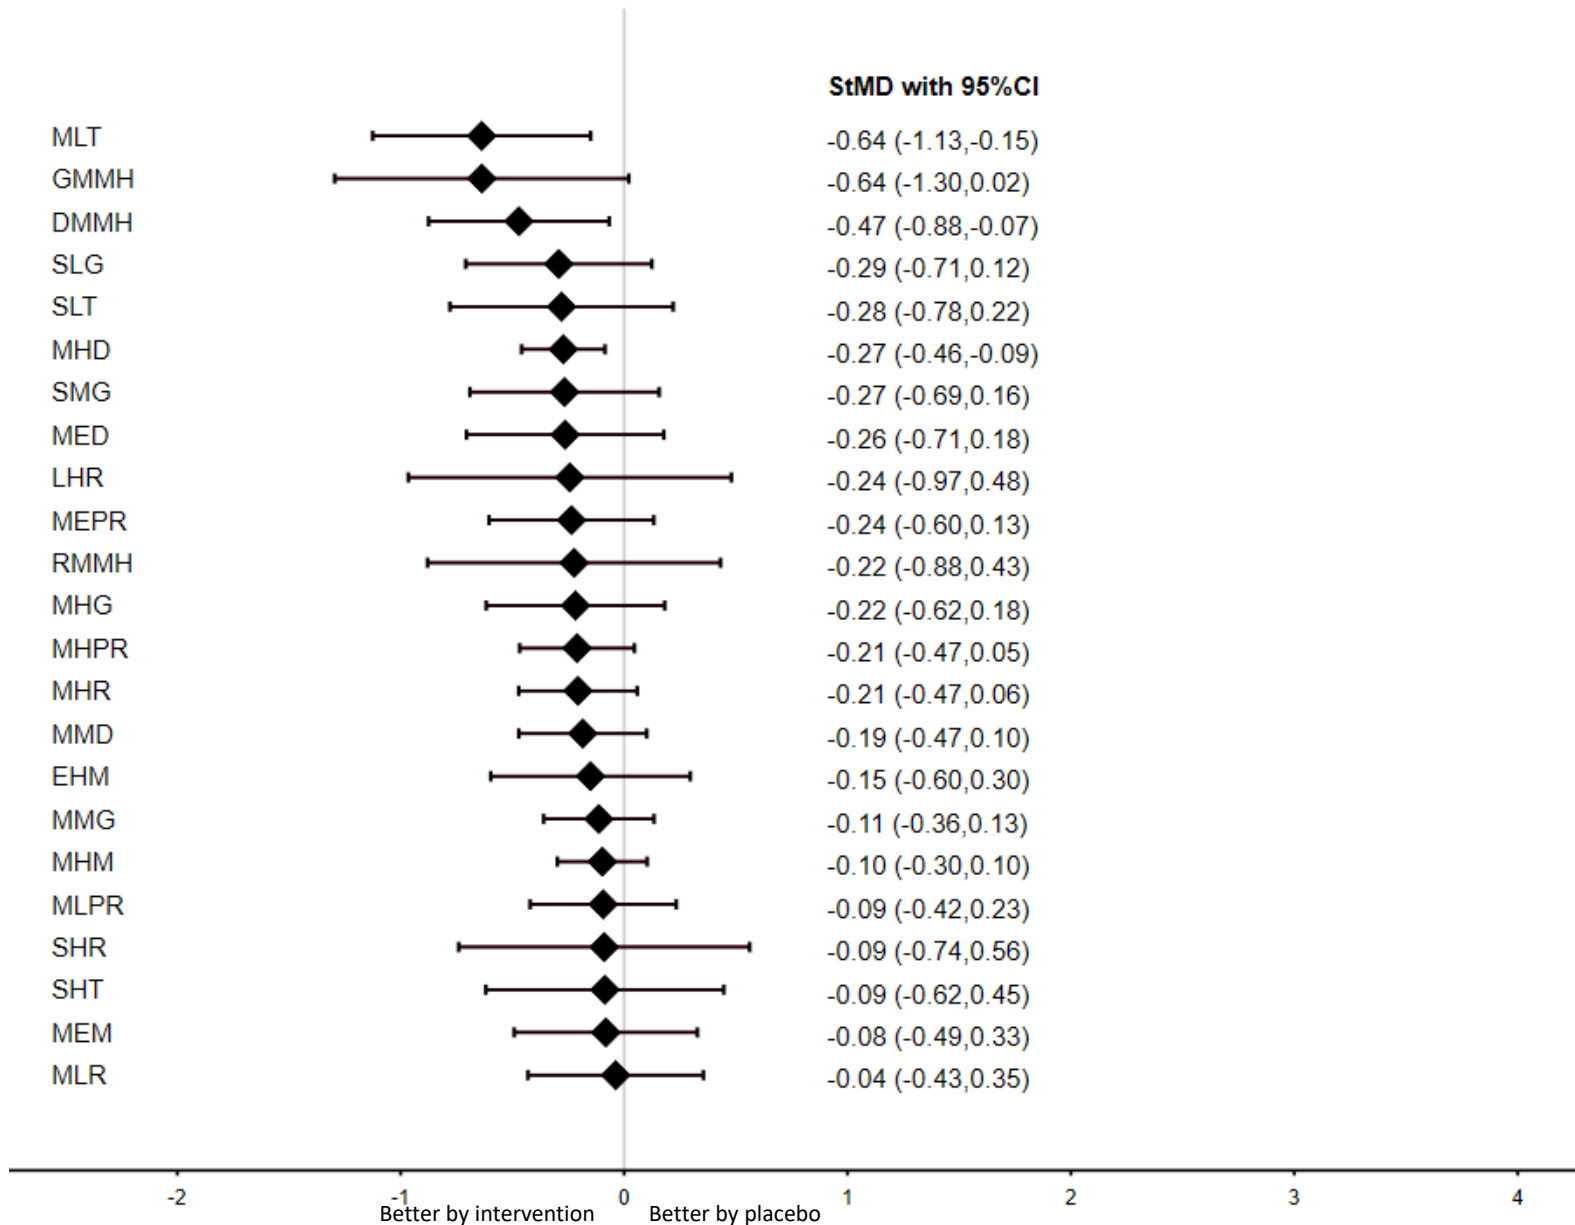

**eFigure 2C forest plot of NMA of quality of life change**

# Behavioral disturbance

Reference treatment: Pla

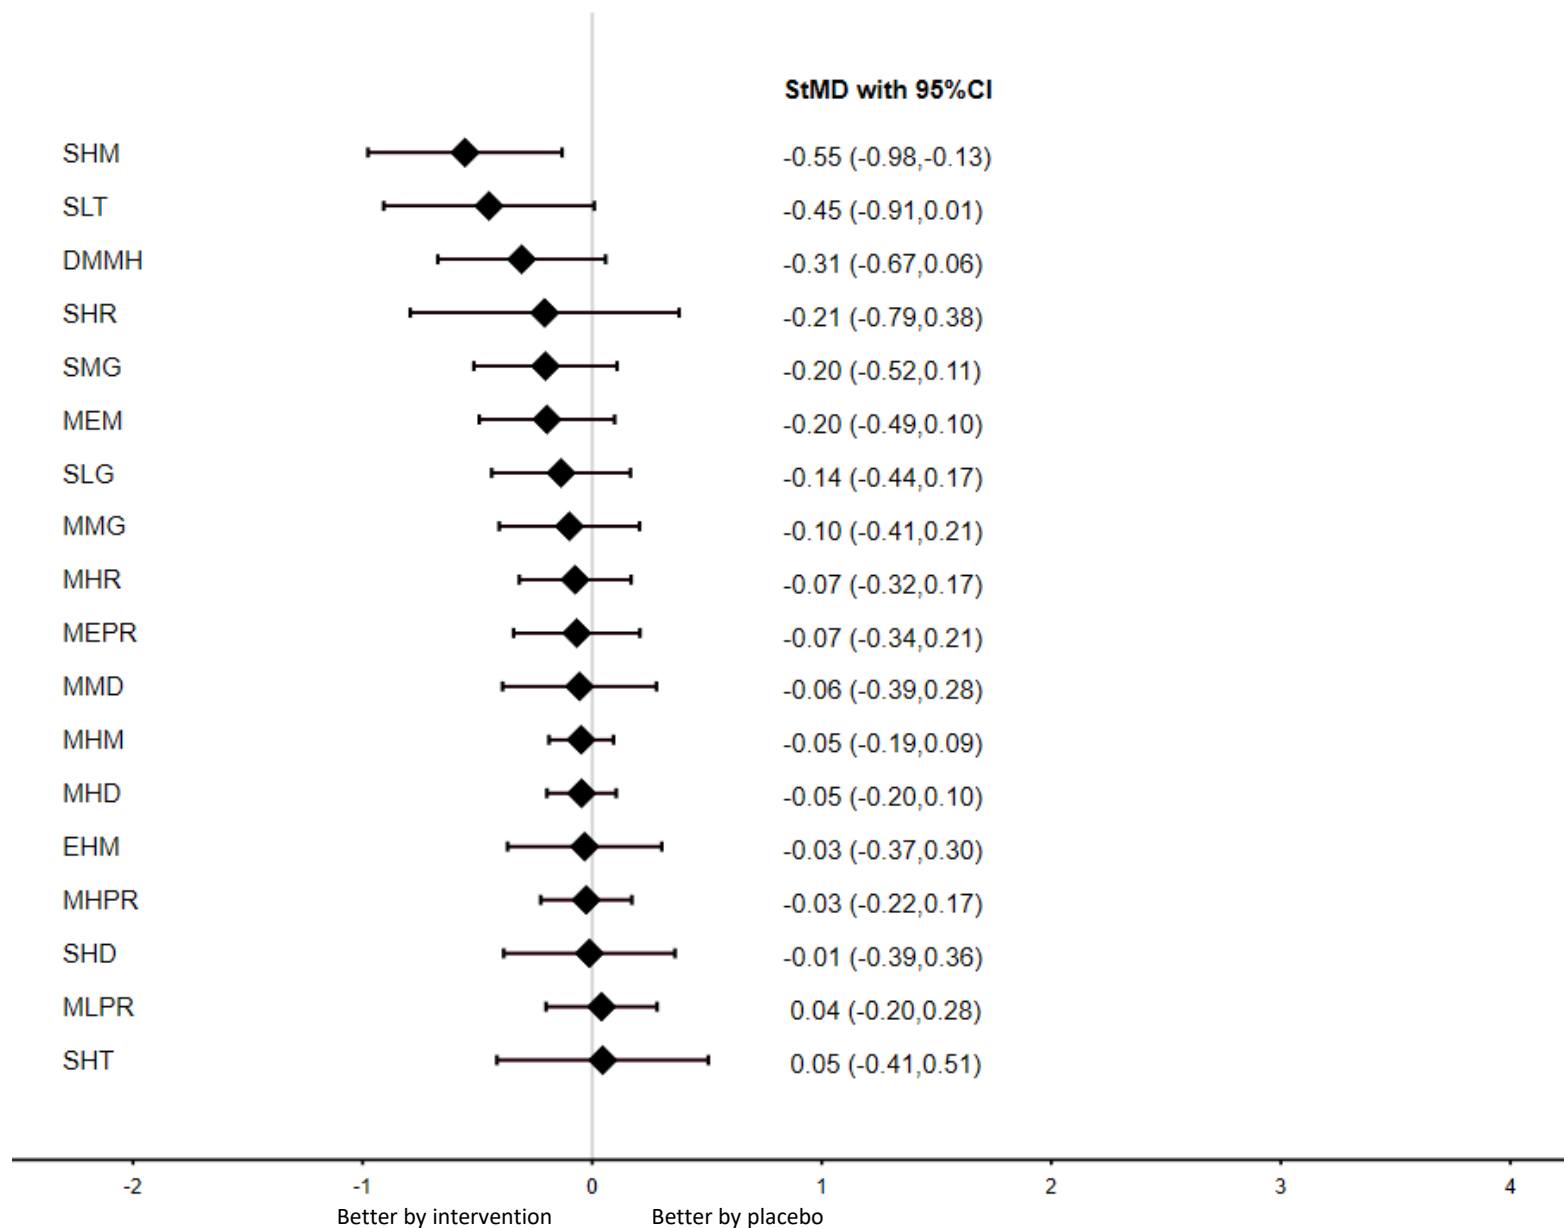

**eFigure 2D forest plot of NMA of changes of behavioral disturbance**

# Drop out rate

Reference treatment: Pla

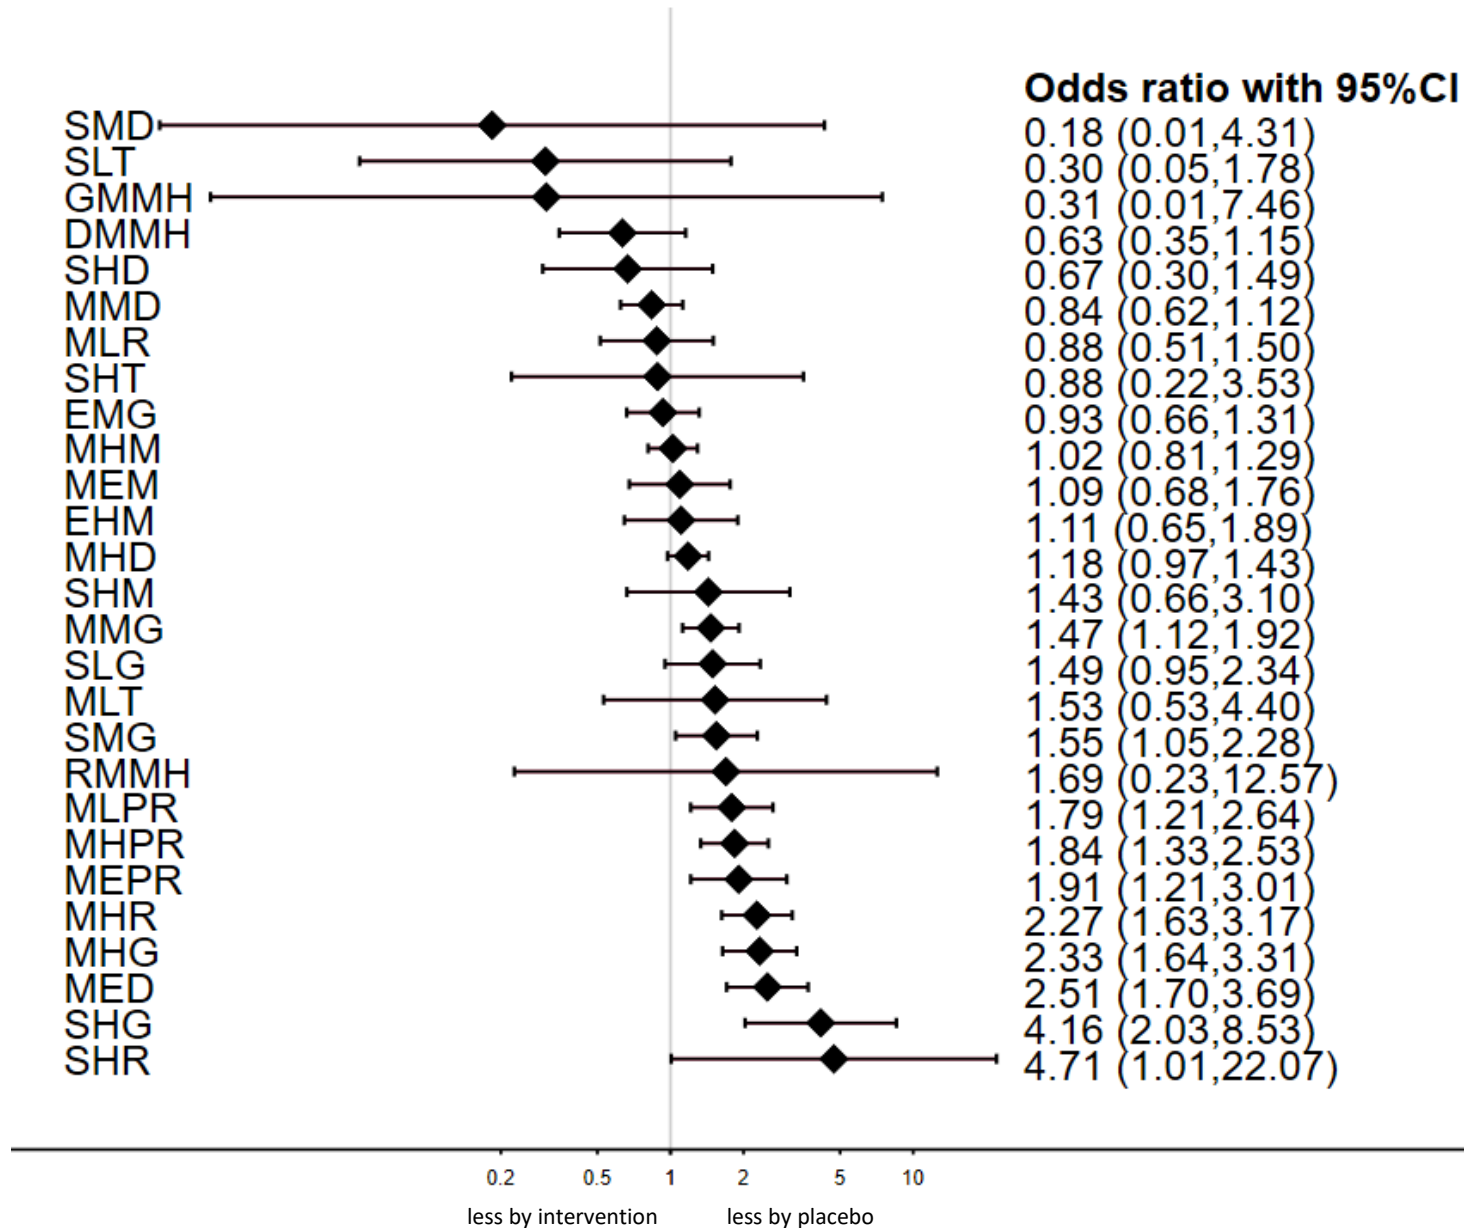

**eFigure 2E forest plot of NMA of drop-out rate**

# Any adverse event rate

Reference treatment: Pla

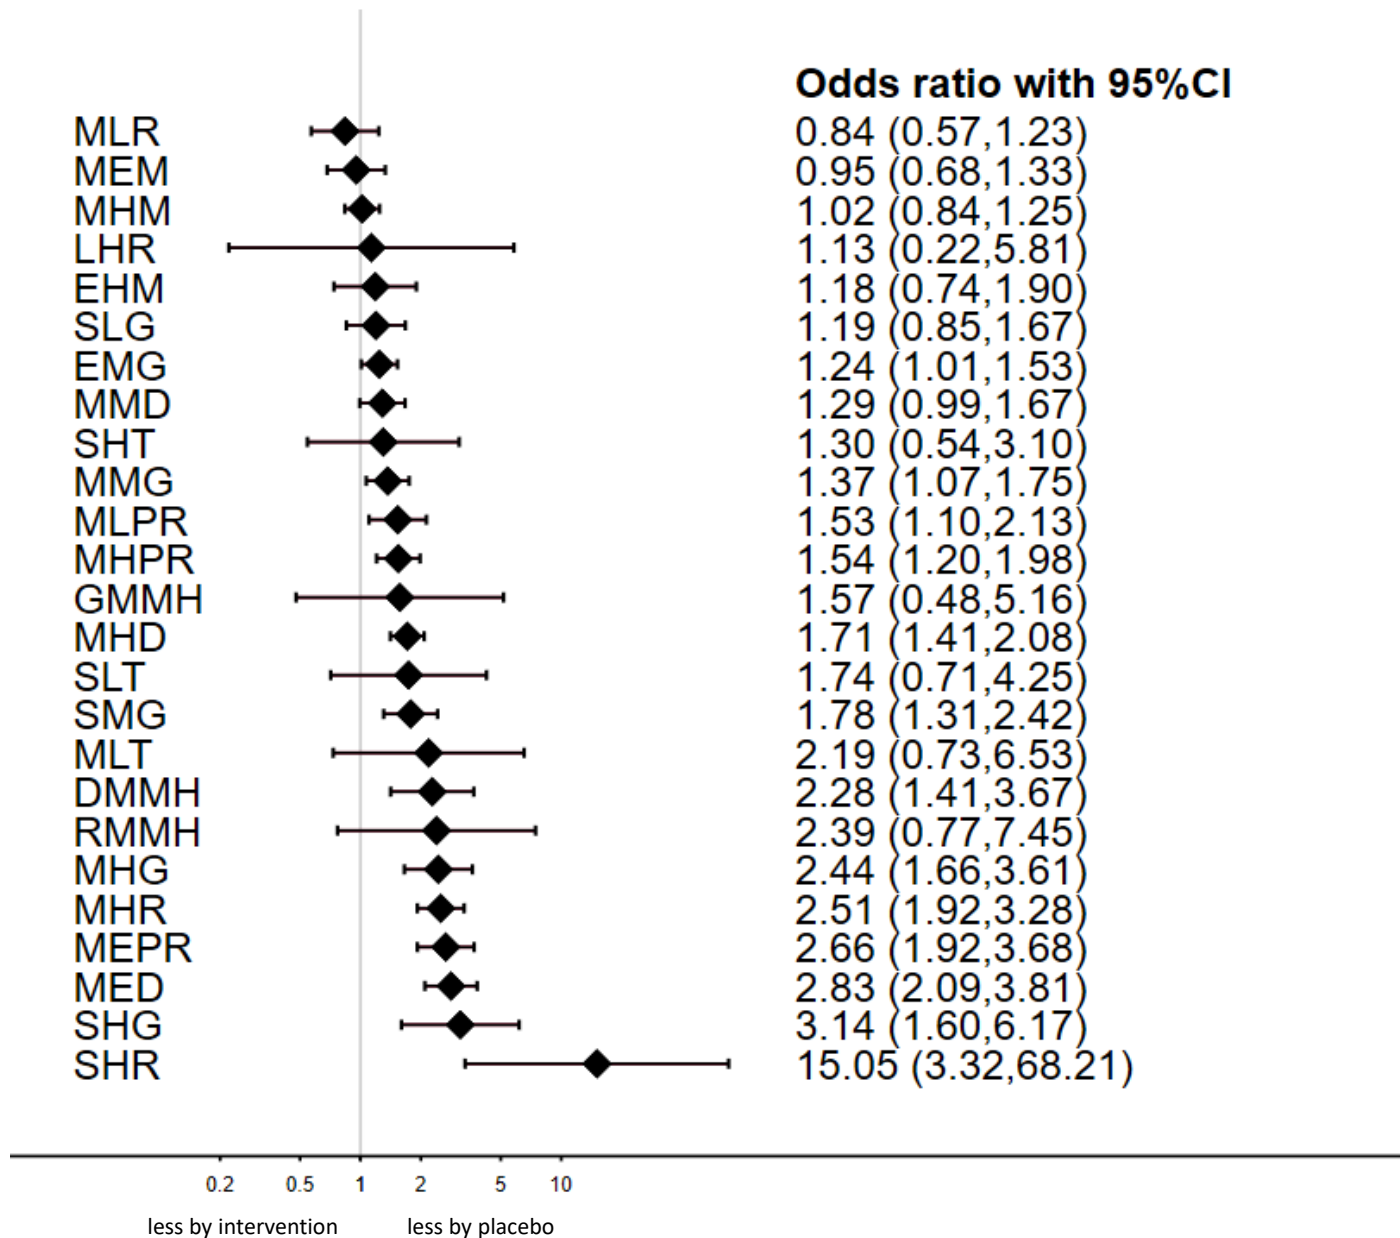

**eFigure 2F forest plot of NMA of rate of any adverse event reported**

# Figure legend of eFigure 2A-2F

Abbreviation: CI: confidence interval; DMMH: medium-term high dose memantine plus high dose donepezil; EHM: extreme-long-term high dose memantine; EMG: extreme-long-term medium dose galantamine; ES: effect size; GMMH: medium-term high dose memantine plus low dose galantamine; LHR: long-term high dose rivastigmine; LLT: long-term low dose melatonin; MA: meta-analysis; MD: mean difference; MED: medium-term extreme high dose donepezil; MEM: medium-term extreme high dose memantine; MEPR: medium-term extreme high dose rivastigmine patch; MHD: medium-term high dose donepezil; MHG: medium-term high dose galantamine; MHM: medium-term high dose memantine; MHPR: medium-term high dose rivastigmine patch; MHR: medium-term high dose rivastigmine; MLPR: medium-term low dose rivastigmine patch; MLR: medium-term low dose rivastigmine; MLT: medium-term low dose melatonin; MMD: medium-term donepezil medium dose; MMG: medium-term medium dose galantamine; MMSE: mini-mental status examination; NMA: network meta-analysis; OR: odds ratio; Pla: Placebo; PRISMA: preferred reporting items for systematic reviews and meta-analyses; RCT: randomized controlled trial; RMMH: medium-term high dose memantine plus medium dose rivastigmine; SHD: short-term high dose donepezil; SHG: short-term high dose galantamine; SHM: short-term high dose memantine; SHR: short-term high dose rivastigmine; SHT: short-term high dose melatonin; SLG: short-term low dose galantamine; SLT: short-term low dose melatonin; SMD: short-term medium dose donepezil; SMG: short-term medium dose galantamine; SMT: short-term medium dose melatonin; StMD: standardized mean difference; SUCRA: surface under the cumulative ranking curve

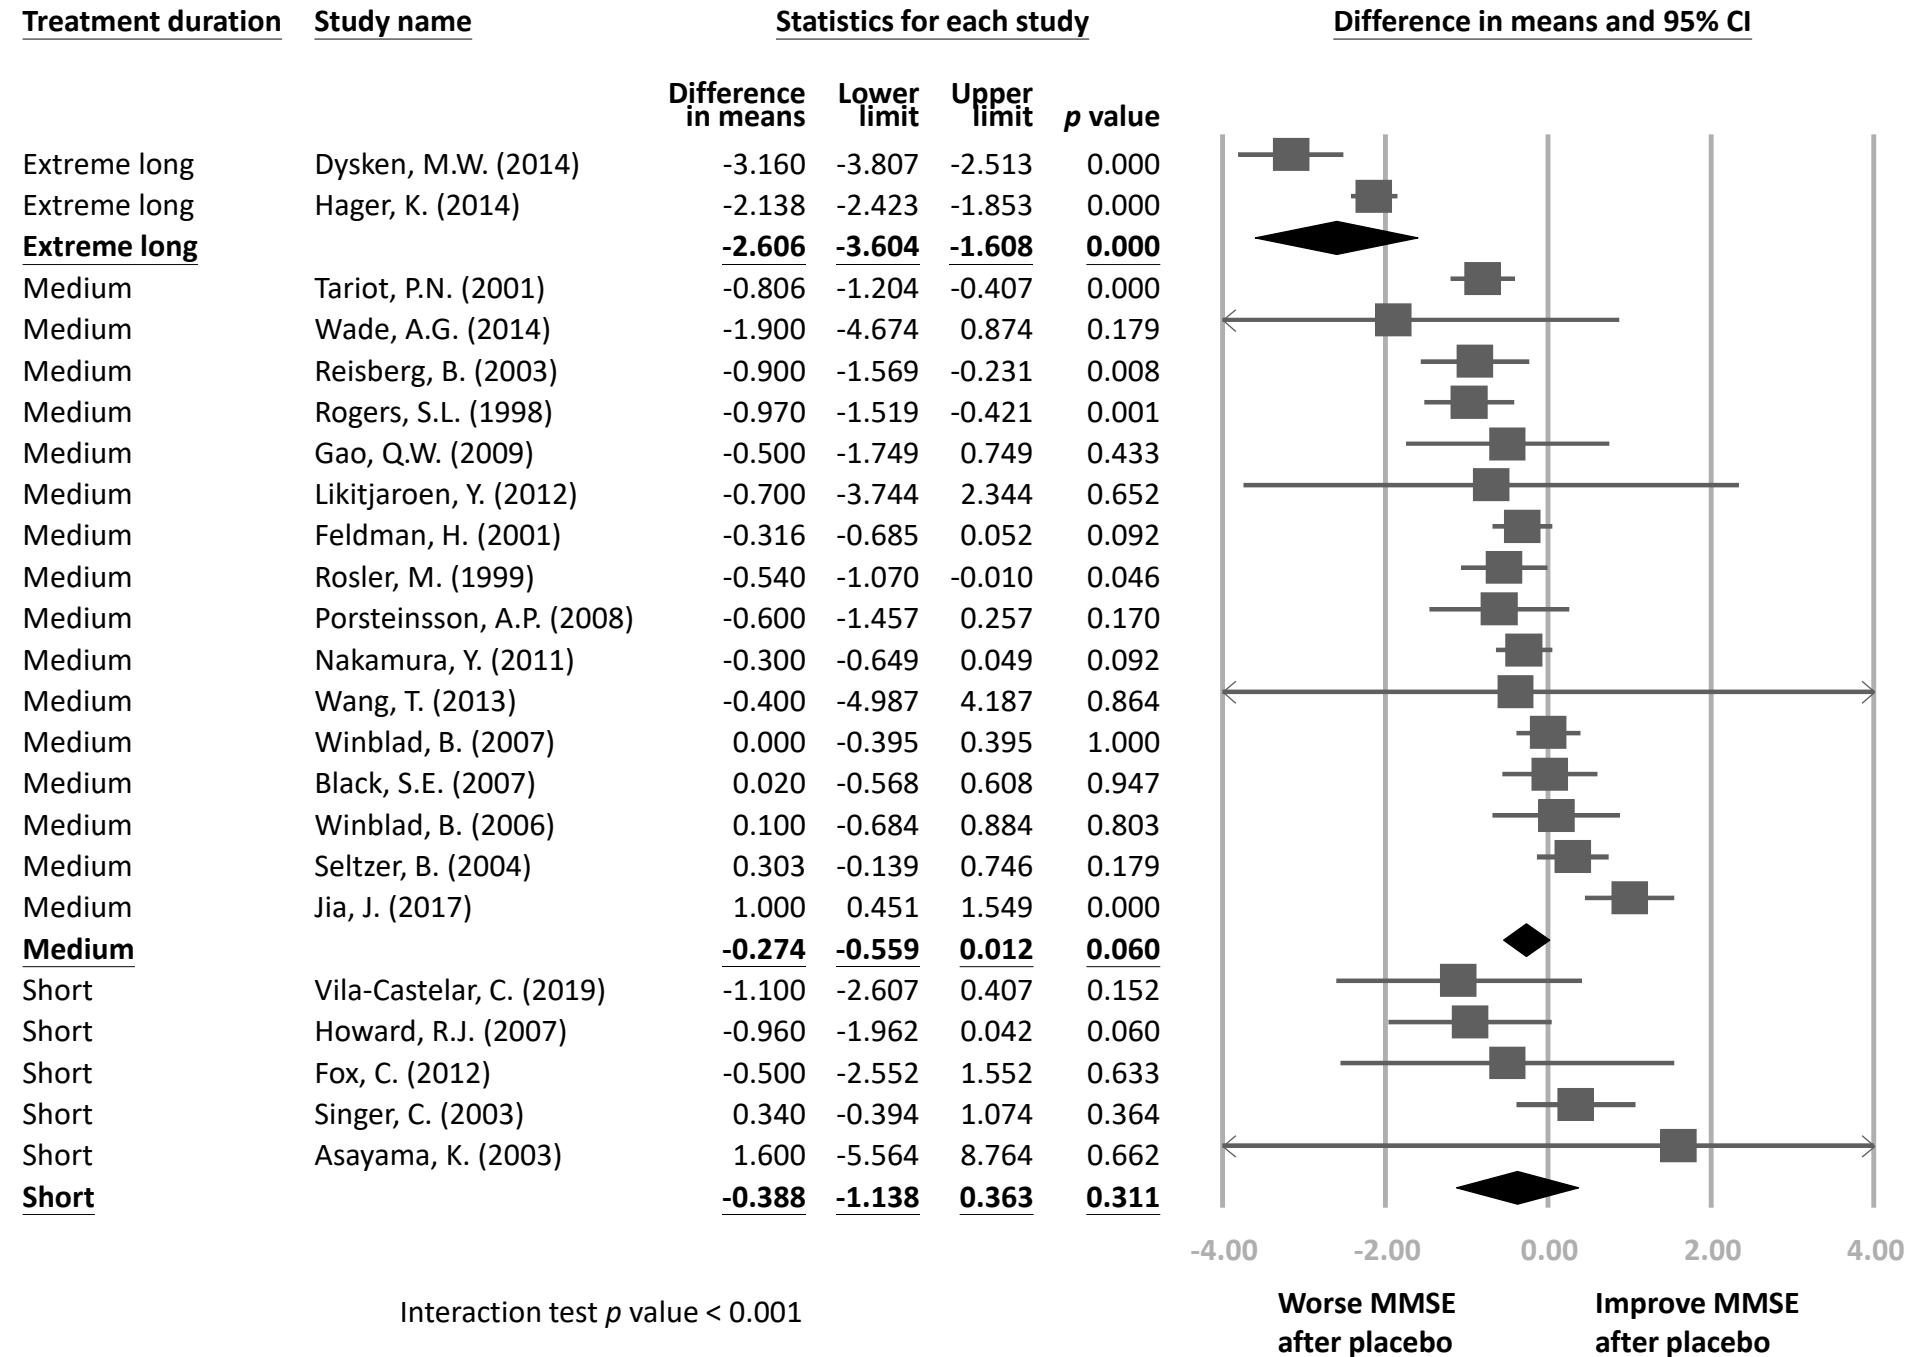

**eFigure 3 transitivity assumption test of primary outcome**



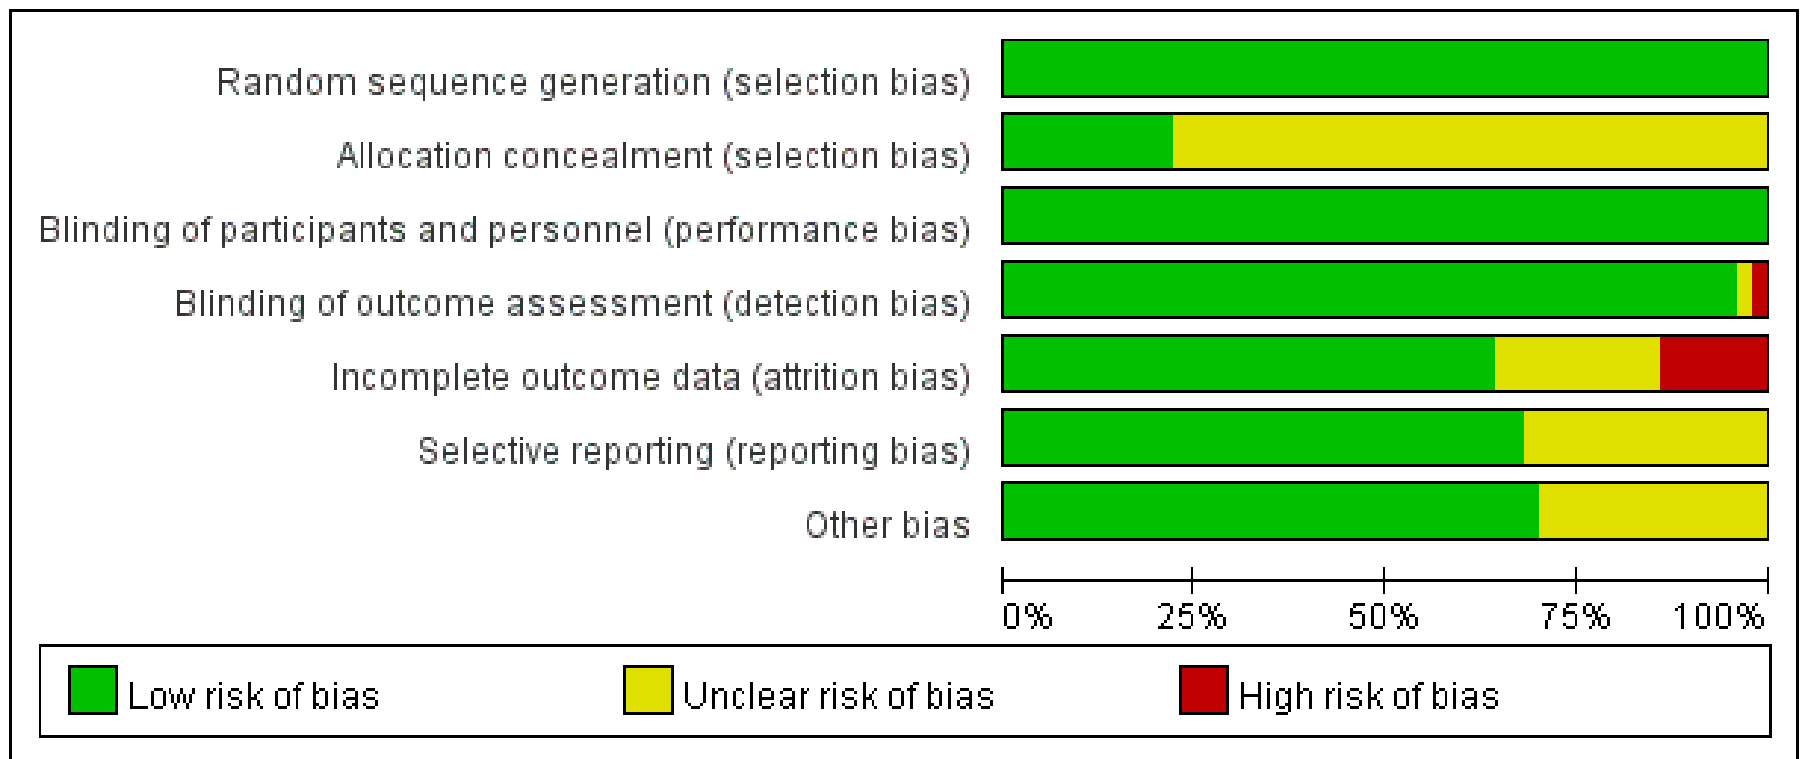

eFigure 4A overview of risk of bias

eFigure 4B detailed risk of bias in each study

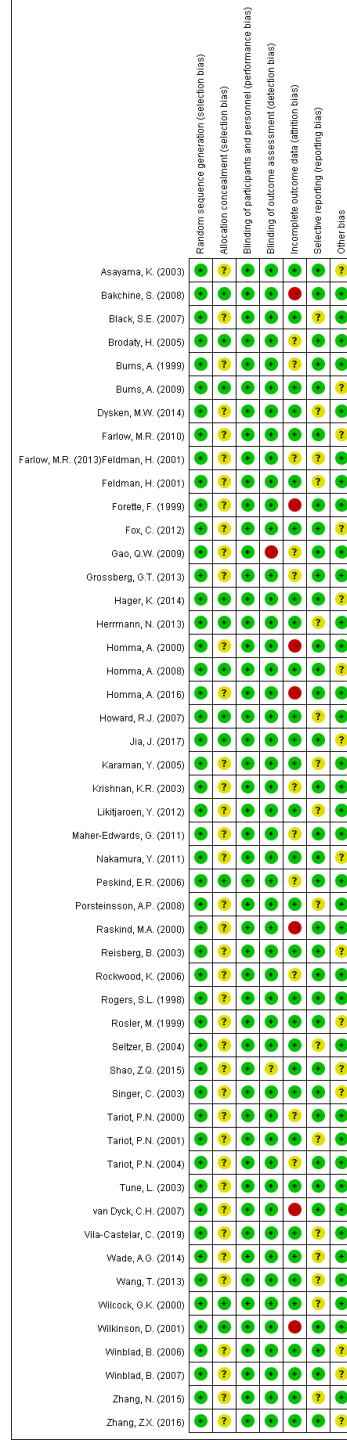

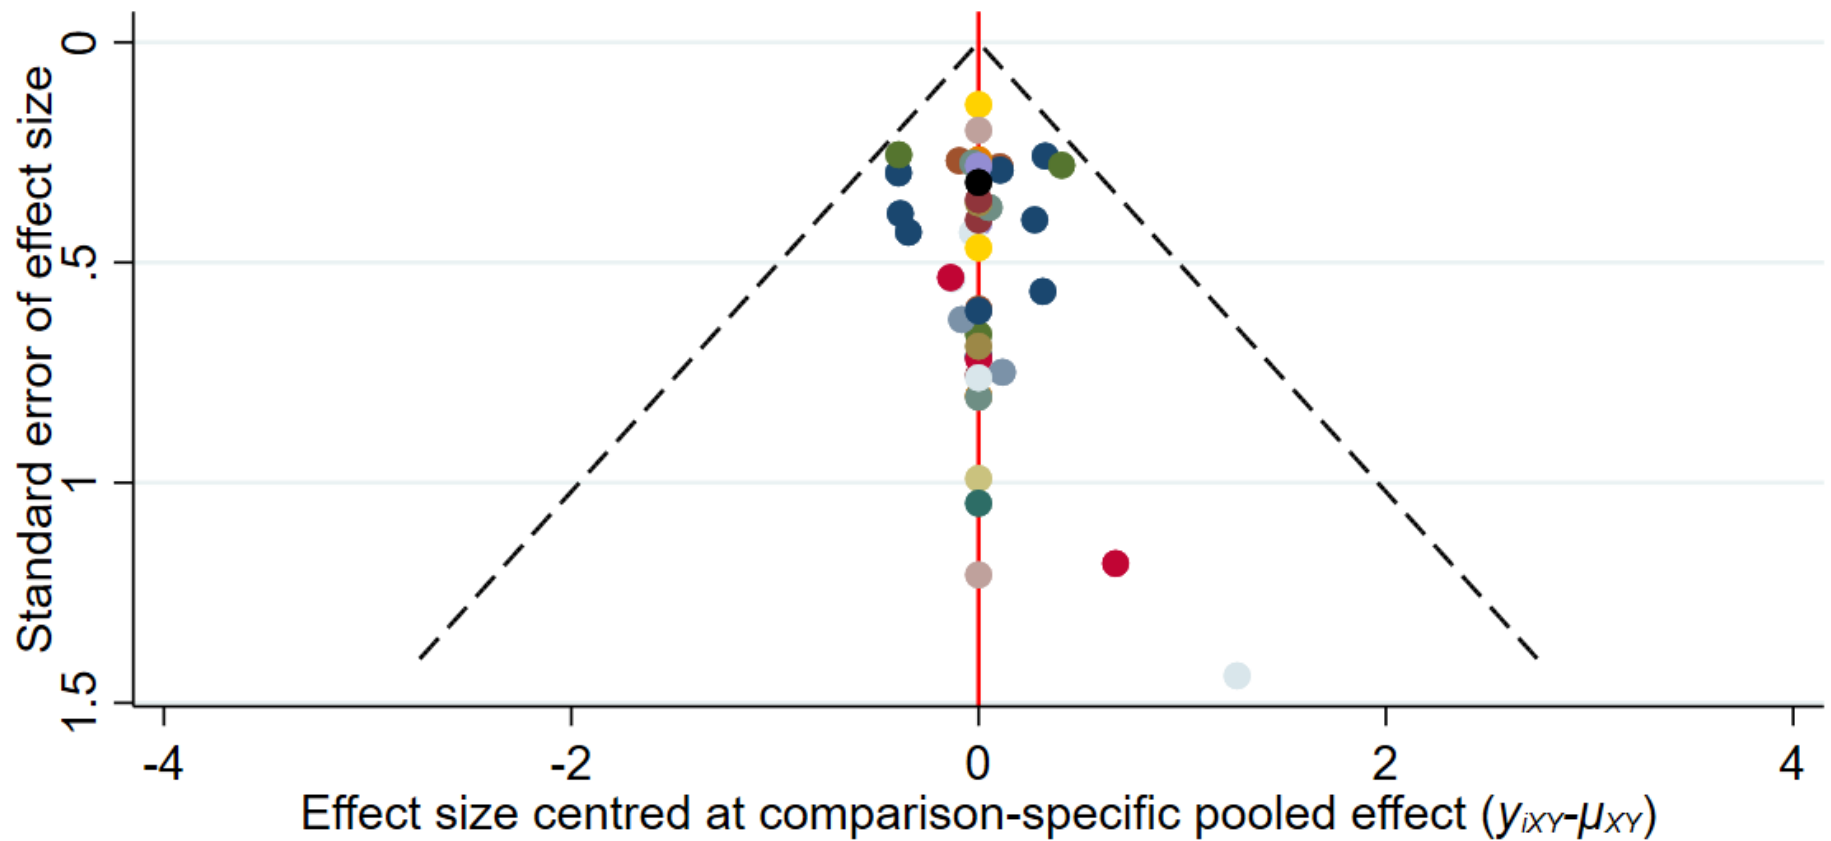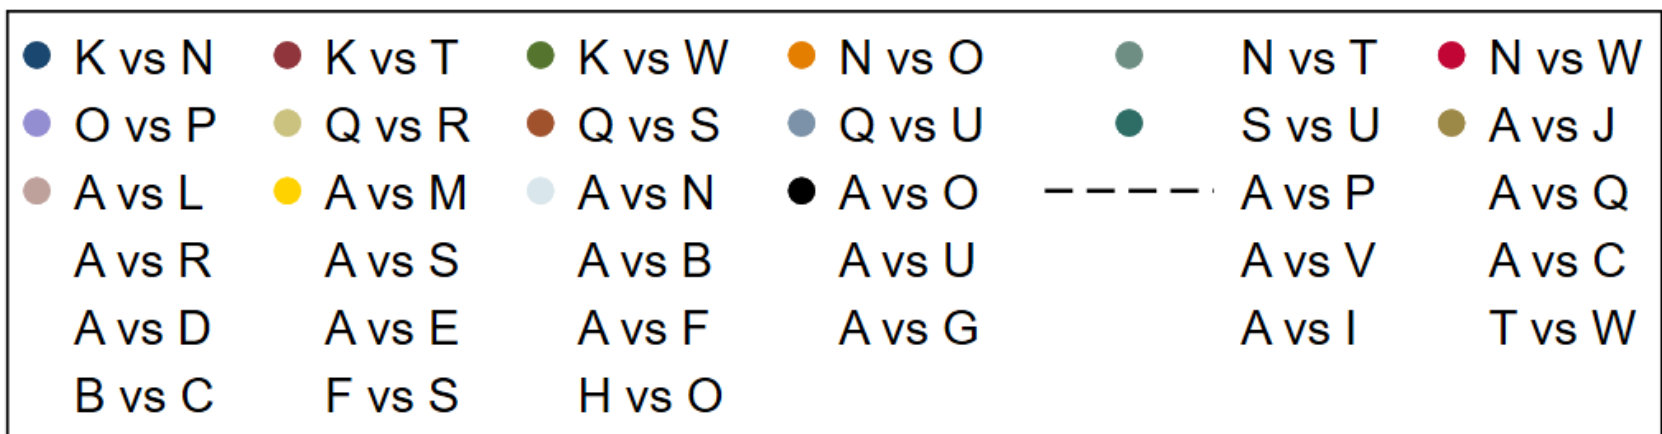

**eFigure 5A Funnel plot of cognition change (measured in MMSE)**

## Treatments used in eFigure 5A

A: Pla  
B: SLT  
C: SHT  
D: MLT  
E: SHM  
F: MLR  
G: EMG  
H: MED  
I: EHM  
J: SHD  
K: GMMH  
L: MMG  
M: LHR  
N: MHM  
O: MHD  
P: MMD  
Q: MHPR  
R: MLPR  
S: MHR  
T: RMMH  
U: MEPR  
V: SMD  
W: DMMH

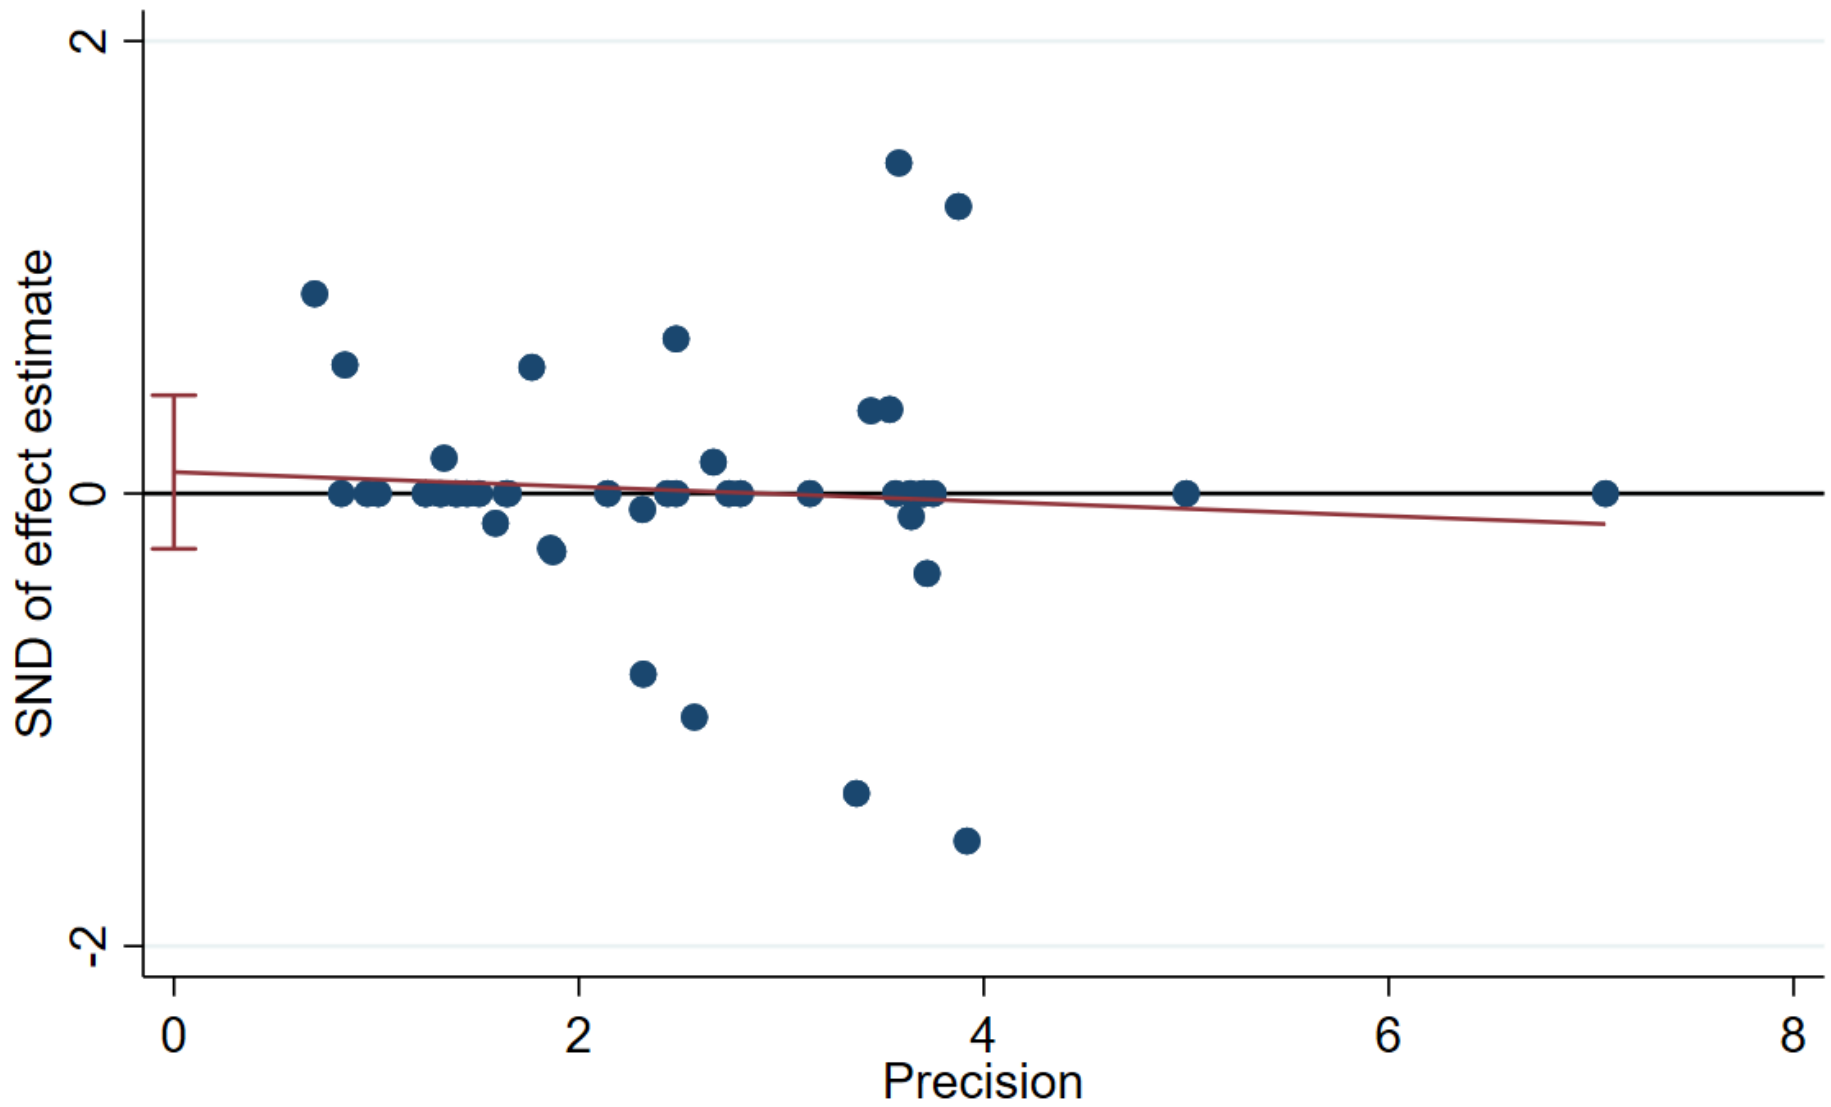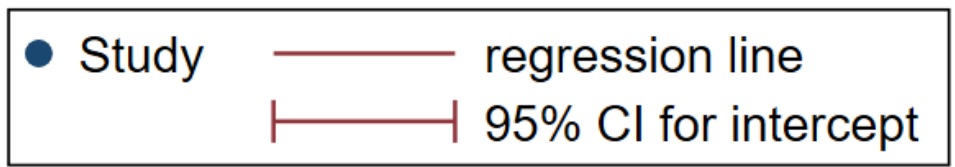

eFigure 5B Egger's regression of cognition change (measured in MMSE)

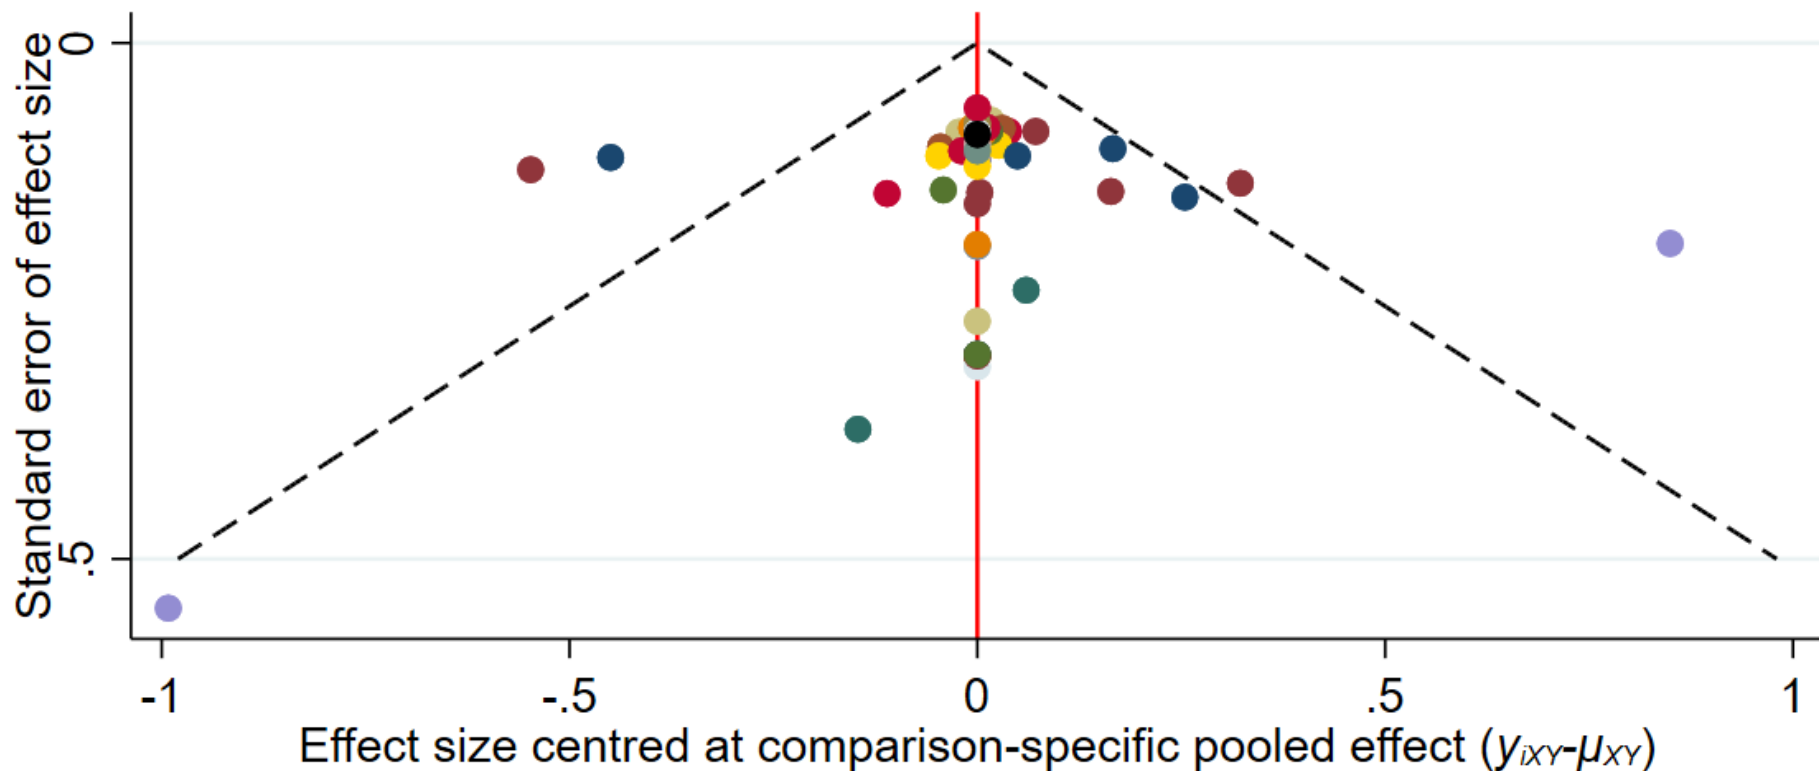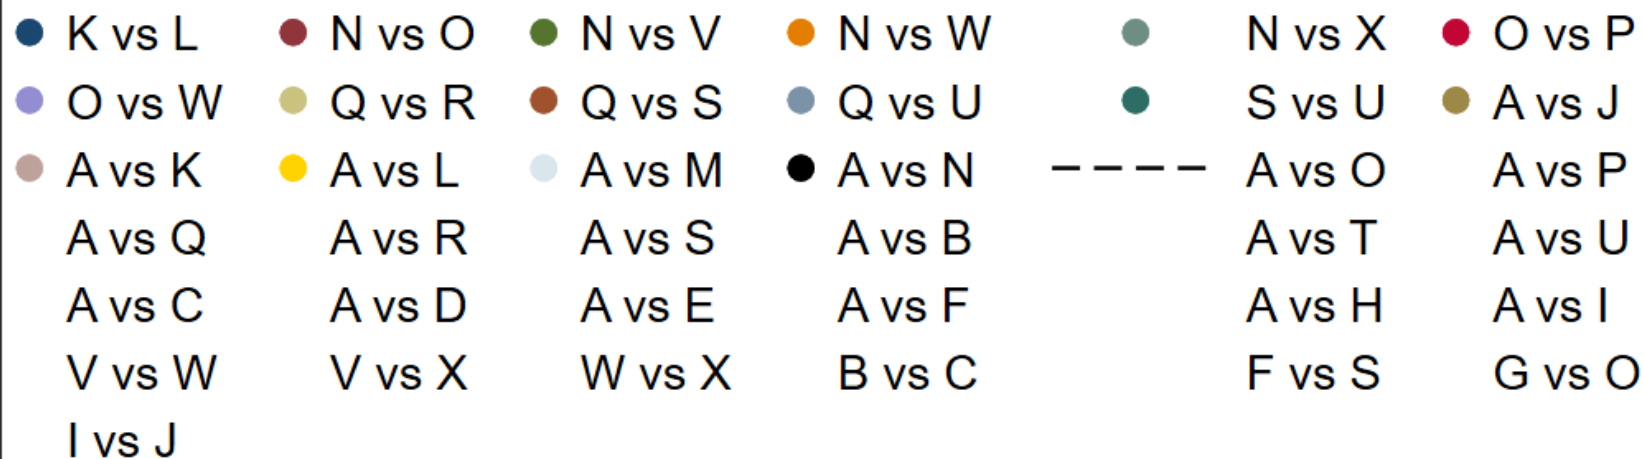

eFigure 5C Funnel plot of changes of quality of life

## Treatments used in eFigure 5C

A: Pla  
B: SLT  
C: SHT  
D: MLT  
E: MEM  
F: MLR  
G: MED  
H: EHM  
I: SLG  
J: SMG  
K: MHG  
L: MMG  
M: LHR  
N: MHM  
O: MHD  
P: MMD  
Q: MHPR  
R: MLPR  
S: MHR  
T: SHR  
U: MEPR  
V: GMMH  
W: DMMH  
X: RMMH

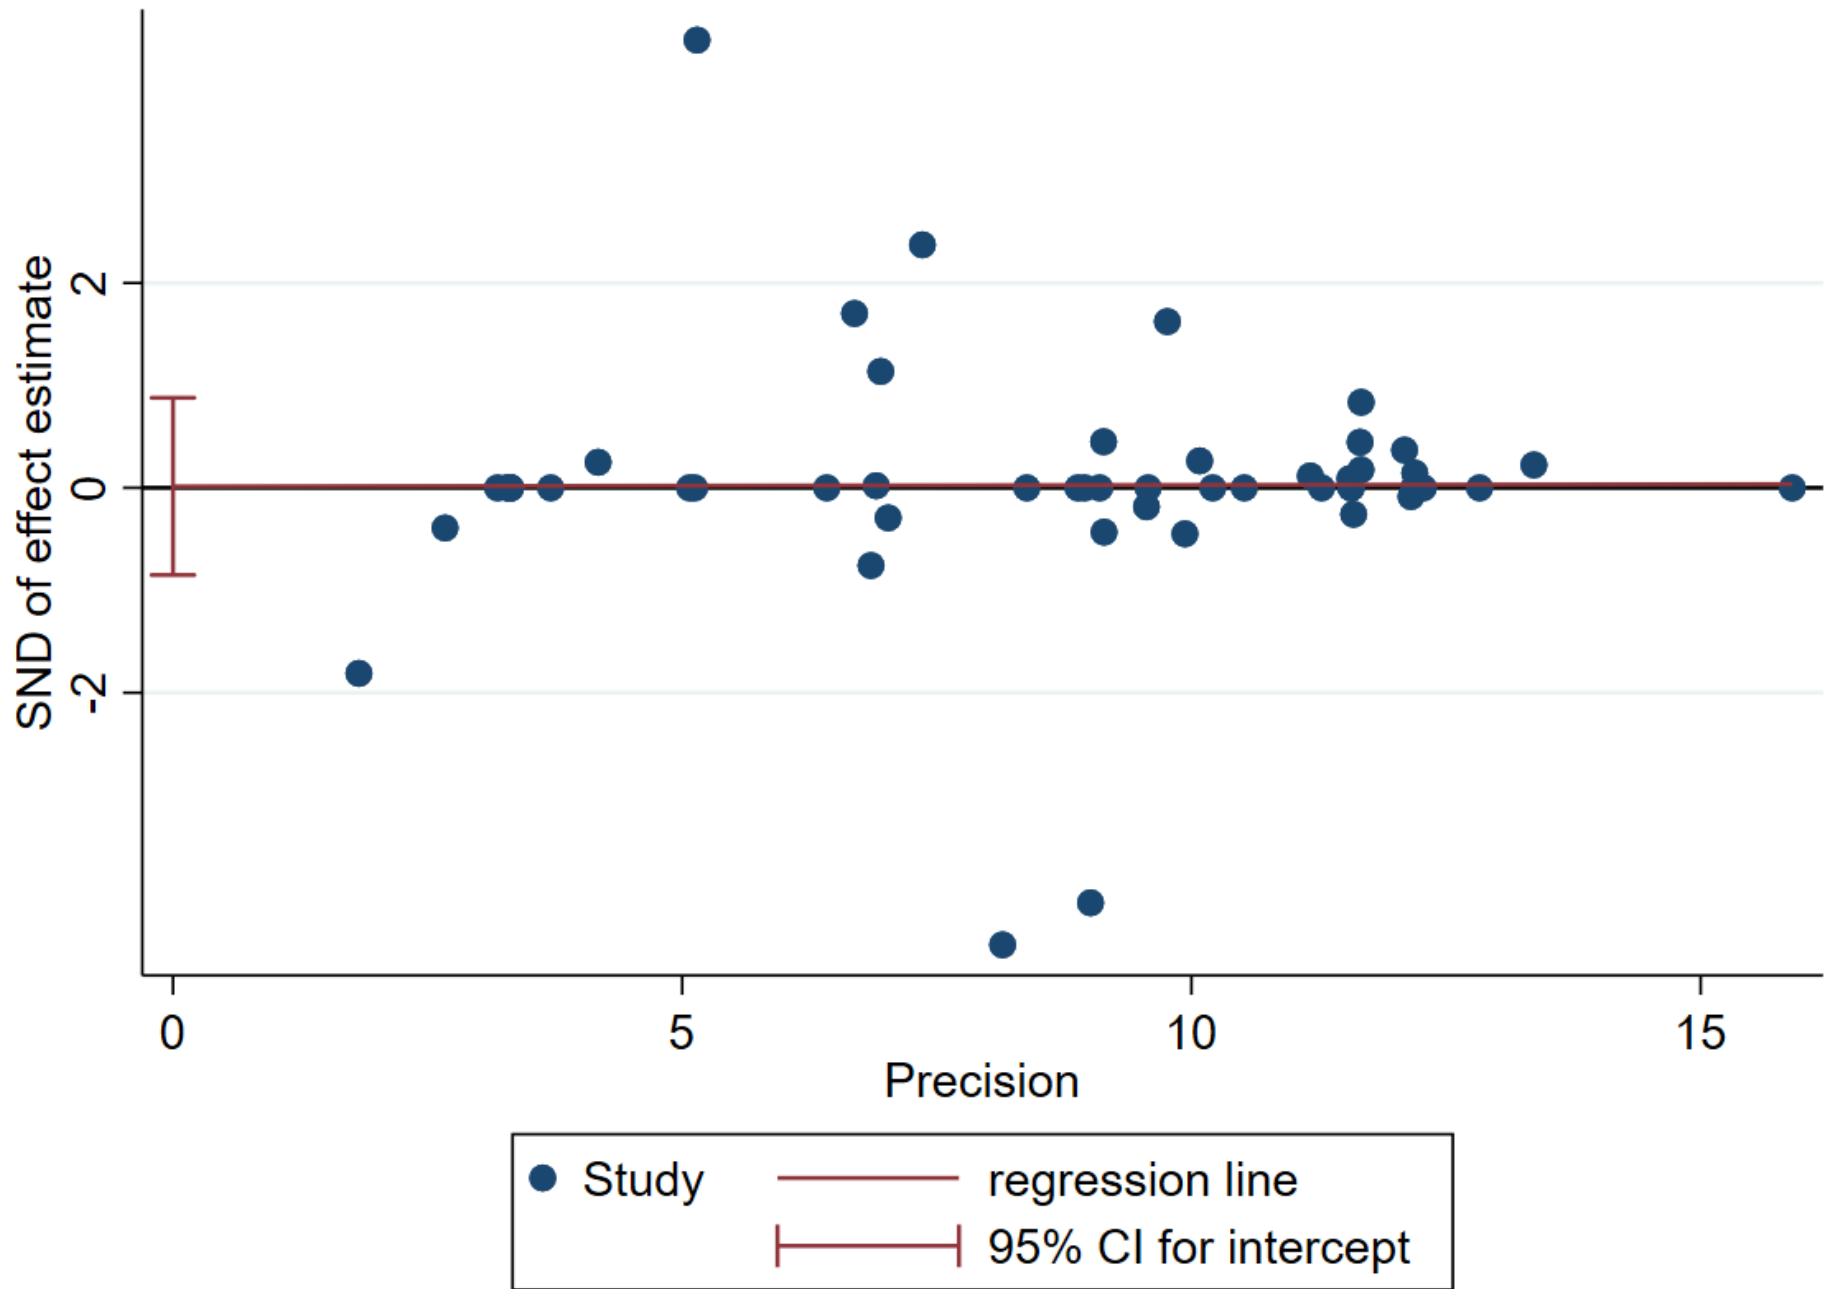

eFigure 5D Egger's regression of changes of quality of life



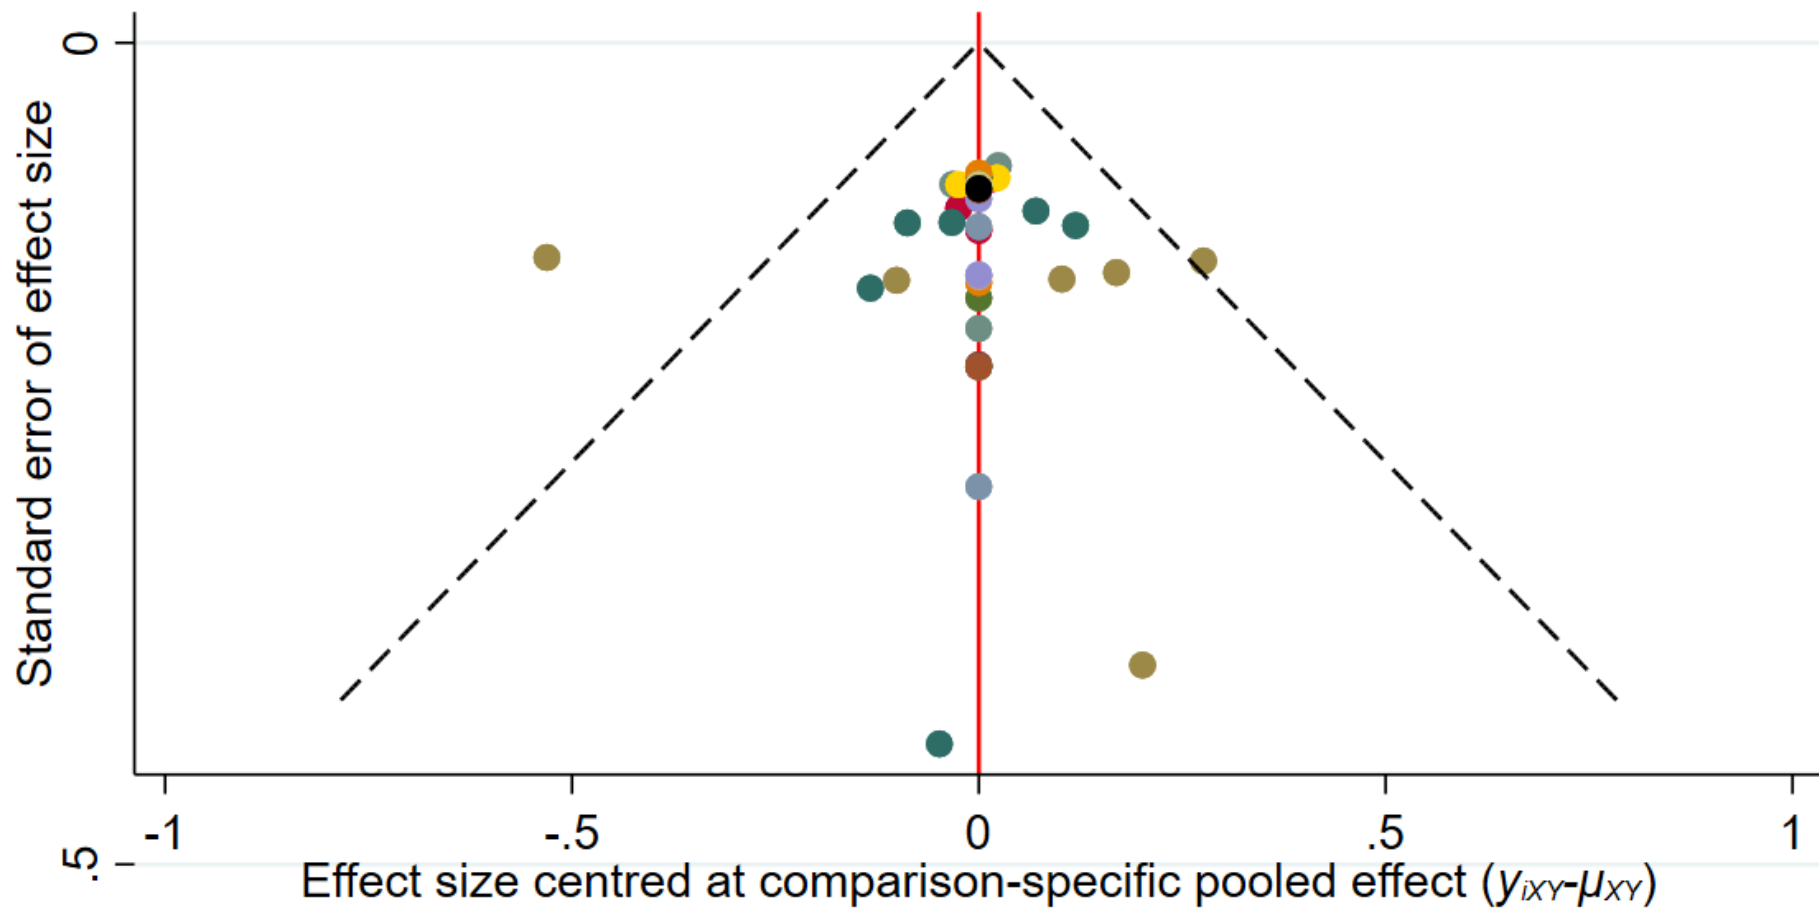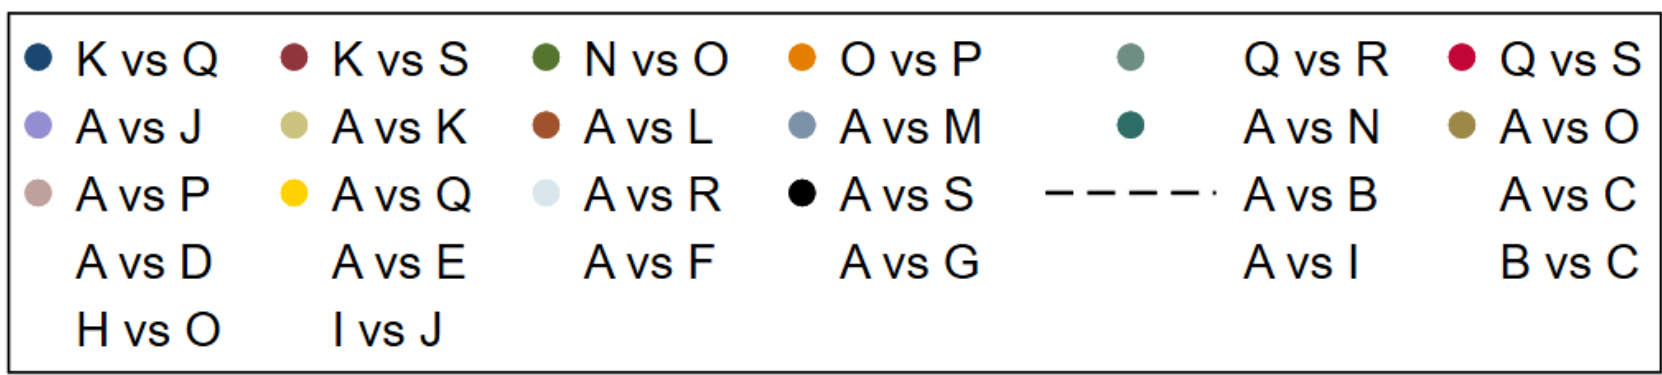

eFigure 5E Funnel plot of changes of behavioral disturbance

## Treatments used in eFigure 5E

A: Pla  
B: SLT  
C: SHT  
D: MEM  
E: SHM  
F: EHM  
G: SHD  
H: DMMH  
I: SLG  
J: SMG  
K: MEPR  
L: MMG  
M: SHR  
N: MHM  
O: MHD  
P: MMD  
Q: MHPR  
R: MLPR  
S: MHR

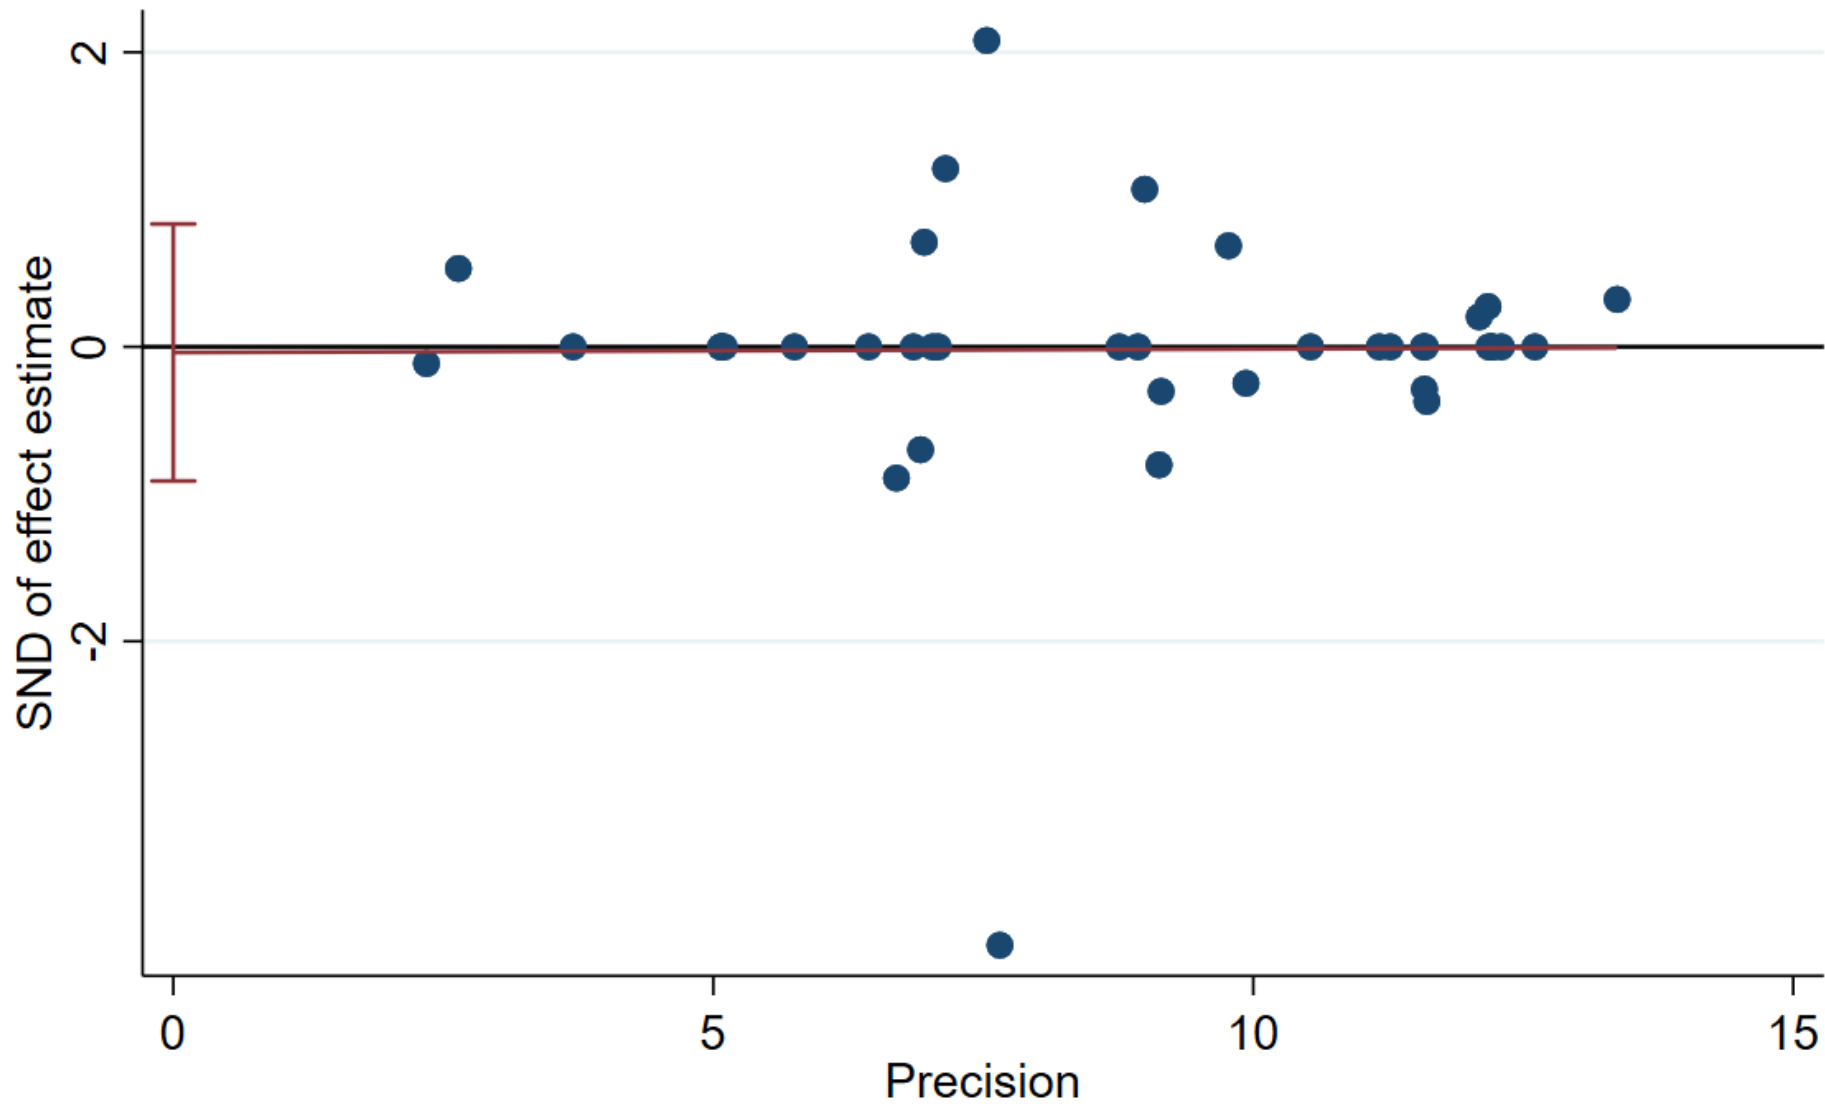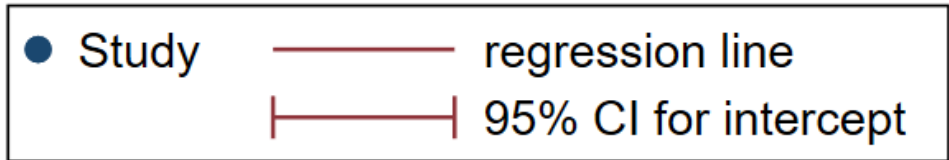

**eFigure 5F Egger's regression of changes of behavioral disturbance**

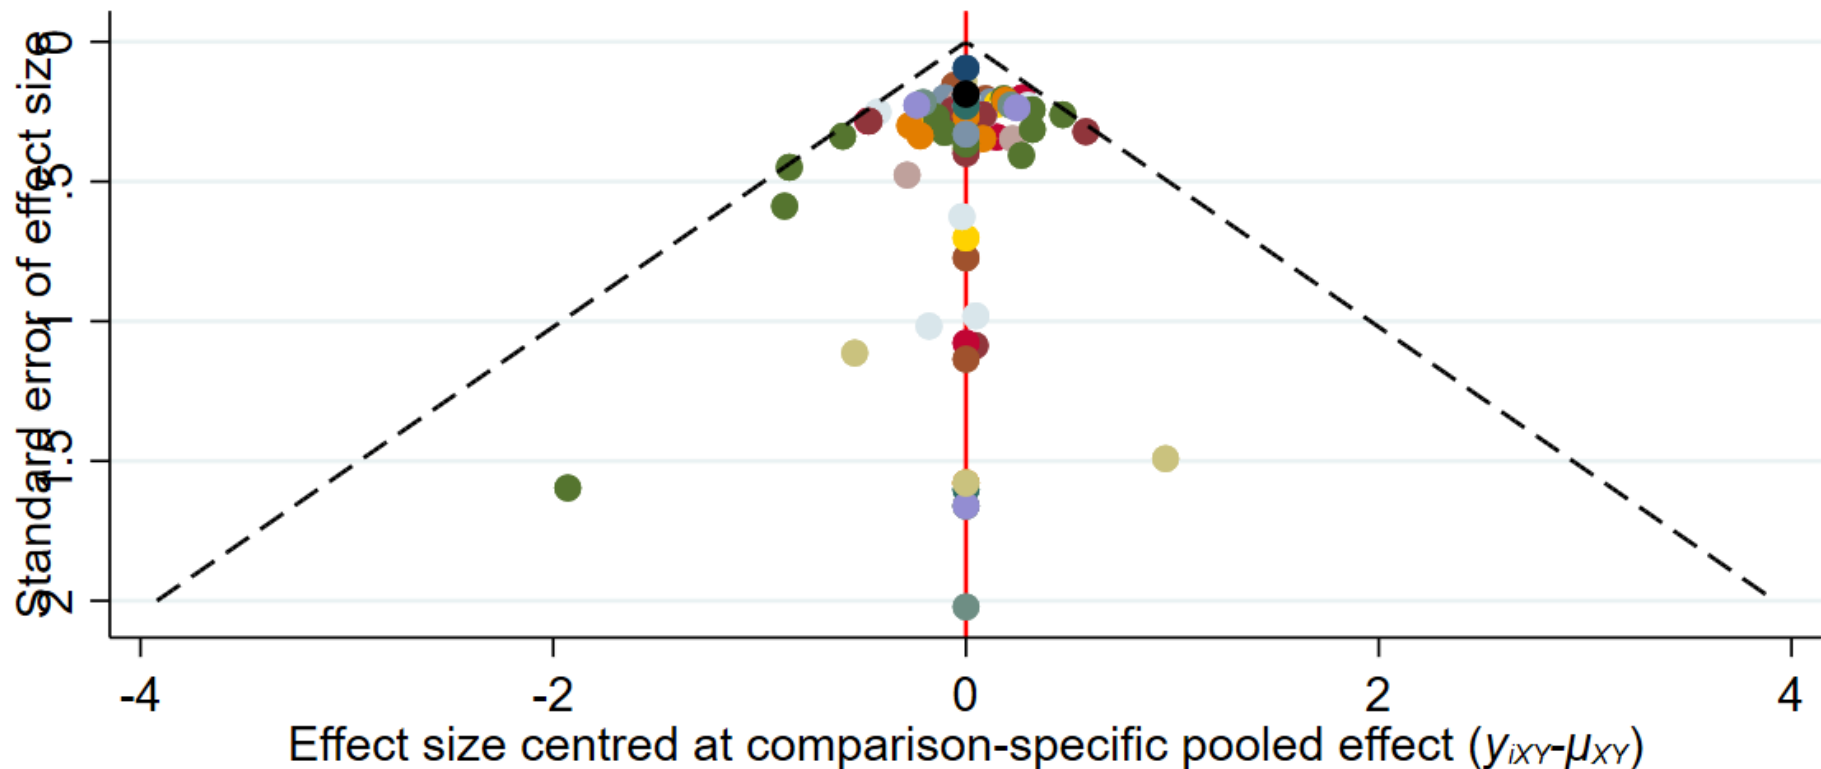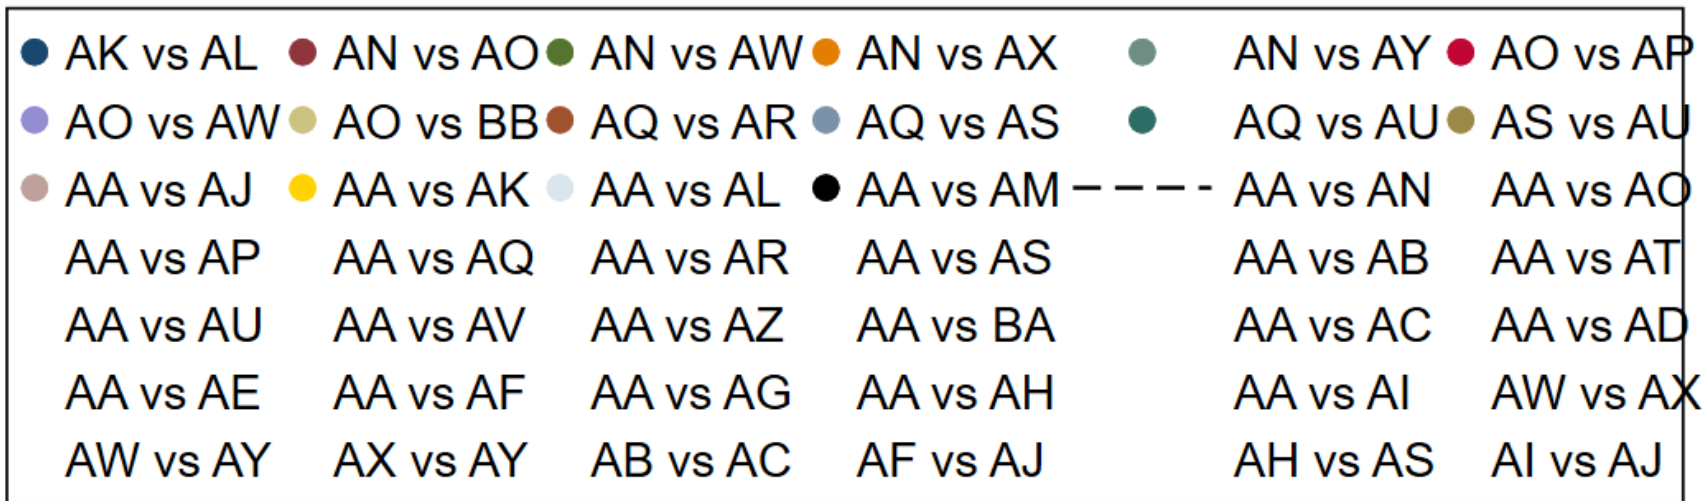

eFigure 5G Funnel plot of drop-out rate

## Treatments used eFigure 5G

AA: Pla  
AB: SLT  
AC: SHT  
AD: MLT  
AE: MEM  
AF: SHG  
AG: SHM  
AH: MLR  
AI: SLG  
AJ: SMG  
AK: MHG  
AL: MMG  
AM: EMG  
AN: MHM  
AO: MHD  
AP: MMD  
AQ: MHPR  
AR: MLPR  
AS: MHR  
AT: SHR  
AU: MEPR  
AV: SMD  
AW: DMMH  
AX: RMMH  
AY: GMMH  
AZ: SHD  
BA: EHM  
BB: MED

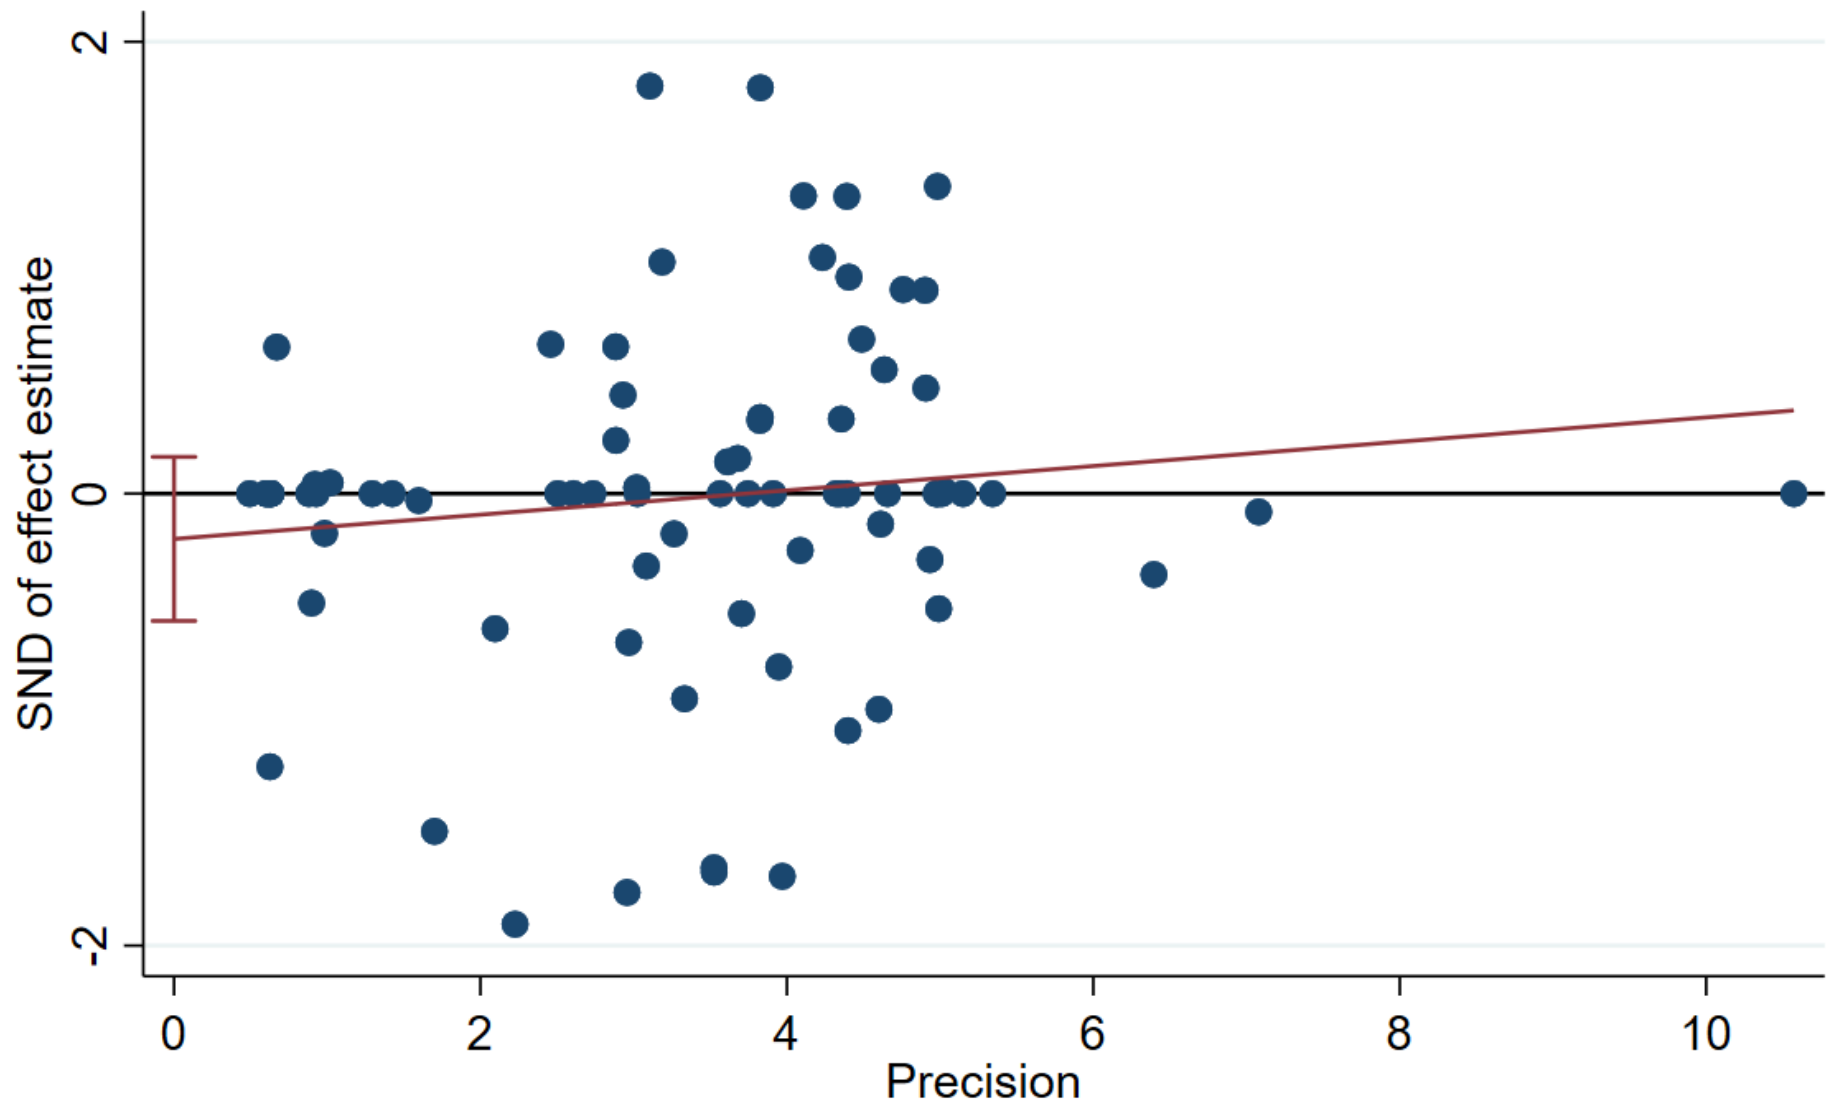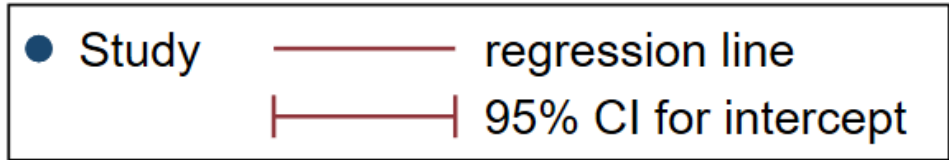

eFigure 5H Egger's regression of drop out rate

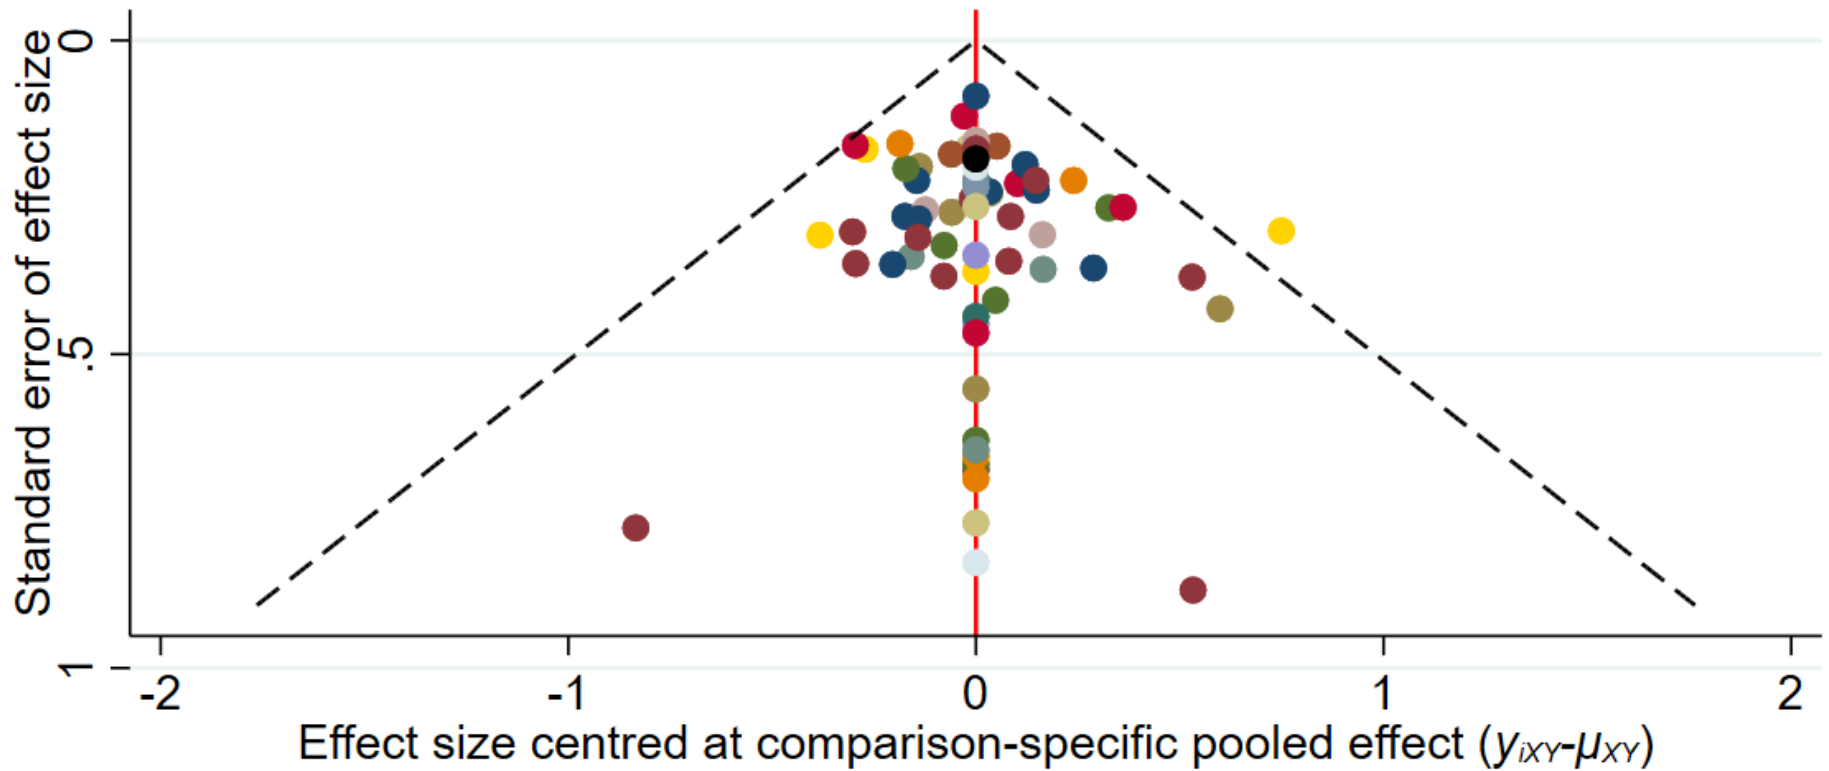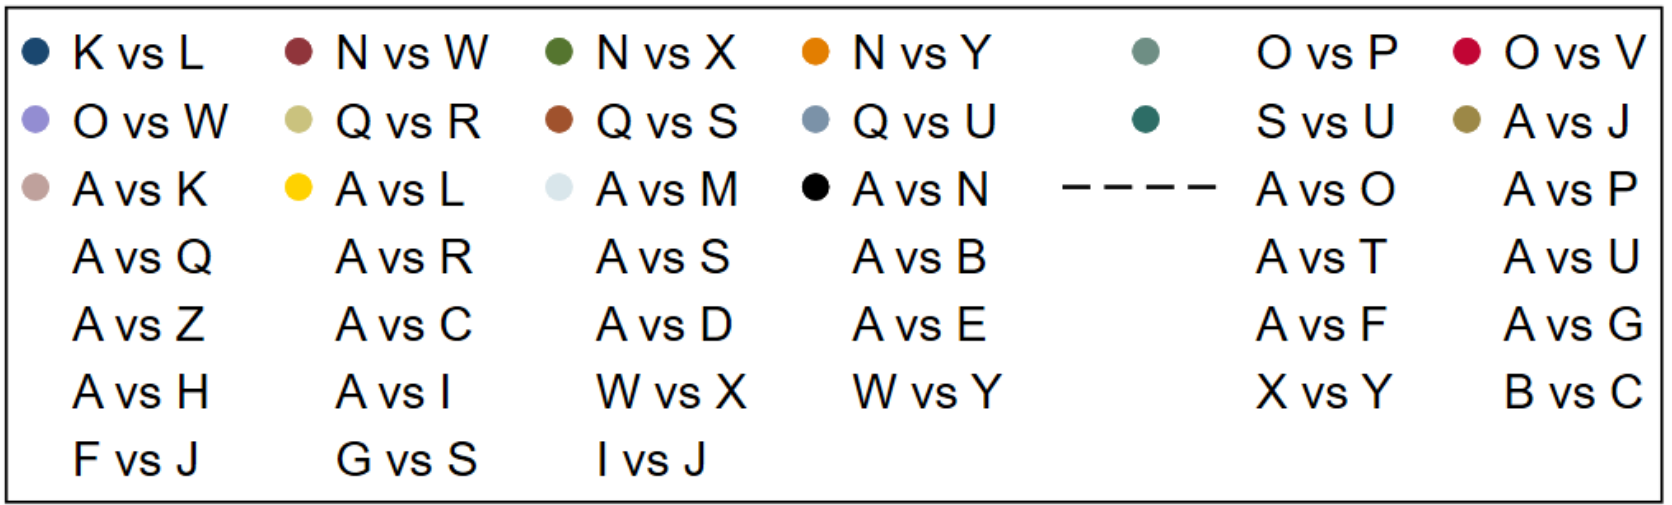

eFigure 5I Funnel plot of rate of any adverse event reported

## Treatments used in eFigure 5I

A: Pla  
B: SLT  
C: SHT  
D: MLT  
E: MEM  
F: SHG  
G: MLR  
H: EMG  
I: SLG  
J: SMG  
K: MHG  
L: MMG  
M: LHR  
N: MHM  
O: MHD  
P: MMD  
Q: MHPR  
R: MLPR  
S: MHR  
T: SHR  
U: MEPR  
V: MED  
W: DMMH  
X: RMMH  
Y: GMMH  
Z: EHM



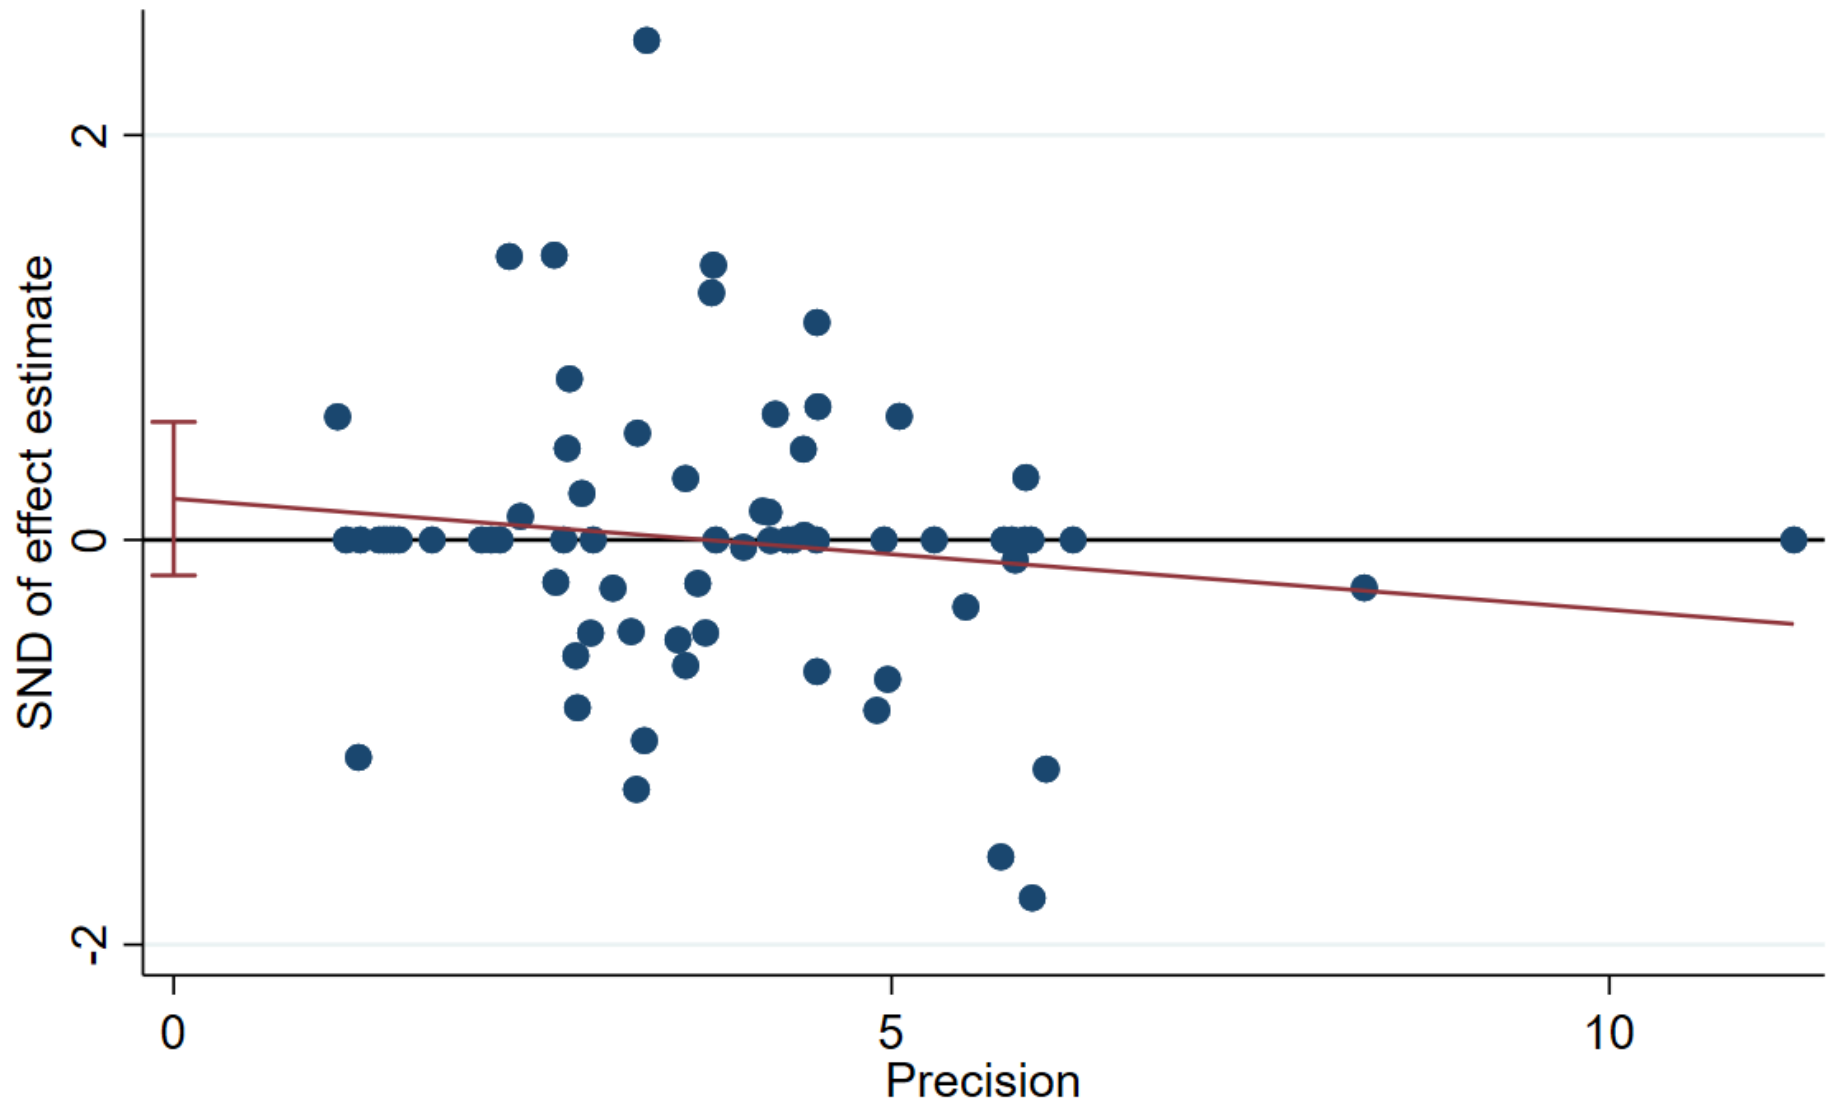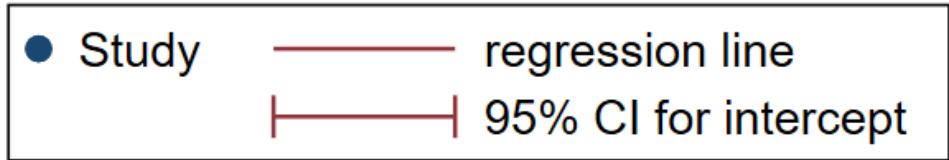

**eFigure 5J Egger's regression of rate of any adverse event reported**

**eTable 1: PRISMA 2020 checklist**

| Section and Topic             | Item # | Checklist item                                                                                                                                                                                                                                                                                       | Page where item is reported |
|-------------------------------|--------|------------------------------------------------------------------------------------------------------------------------------------------------------------------------------------------------------------------------------------------------------------------------------------------------------|-----------------------------|
| <b>TITLE</b>                  |        |                                                                                                                                                                                                                                                                                                      |                             |
| Title                         | 1      | Identify the report as a systematic review.                                                                                                                                                                                                                                                          | 1                           |
| <b>ABSTRACT</b>               |        |                                                                                                                                                                                                                                                                                                      |                             |
| Abstract                      | 2      | See the PRISMA 2020 for Abstracts checklist.                                                                                                                                                                                                                                                         | 4                           |
| <b>INTRODUCTION</b>           |        |                                                                                                                                                                                                                                                                                                      |                             |
| Rationale                     | 3      | Describe the rationale for the review in the context of existing knowledge.                                                                                                                                                                                                                          | 6-7                         |
| Objectives                    | 4      | Provide an explicit statement of the objective(s) or question(s) the review addresses.                                                                                                                                                                                                               | 6-7                         |
| <b>METHODS</b>                |        |                                                                                                                                                                                                                                                                                                      |                             |
| Eligibility criteria          | 5      | Specify the inclusion and exclusion criteria for the review and how studies were grouped for the syntheses.                                                                                                                                                                                          | 8-9                         |
| Information sources           | 6      | Specify all databases, registers, websites, organisations, reference lists and other sources searched or consulted to identify studies. Specify the date when each source was last searched or consulted.                                                                                            | 8-9                         |
| Search strategy               | 7      | Present the full search strategies for all databases, registers and websites, including any filters and limits used.                                                                                                                                                                                 | 8-9                         |
| Selection process             | 8      | Specify the methods used to decide whether a study met the inclusion criteria of the review, including how many reviewers screened each record and each report retrieved, whether they worked independently, and if applicable, details of automation tools used in the process.                     | 8-9                         |
| Data collection process       | 9      | Specify the methods used to collect data from reports, including how many reviewers collected data from each report, whether they worked independently, any processes for obtaining or confirming data from study investigators, and if applicable, details of automation tools used in the process. | 8-9                         |
| Data items                    | 10a    | List and define all outcomes for which data were sought. Specify whether all results that were compatible with each outcome domain in each study were sought (e.g. for all measures, time points, analyses), and if not, the methods used to decide which results to collect.                        | 9-10                        |
|                               | 10b    | List and define all other variables for which data were sought (e.g. participant and intervention characteristics, funding sources). Describe any assumptions made about any missing or unclear information.                                                                                         | 9-10                        |
| Study risk of bias assessment | 11     | Specify the methods used to assess risk of bias in the included studies, including details of the tool(s) used, how many reviewers assessed each study and whether they worked independently, and if applicable, details of automation tools used in the process.                                    | 9-10                        |
| Effect measures               | 12     | Specify for each outcome the effect measure(s) (e.g. risk ratio, mean difference) used in the synthesis or presentation of results.                                                                                                                                                                  | 9-10                        |
| Synthesis methods             | 13a    | Describe the processes used to decide which studies were eligible for each synthesis (e.g. tabulating the study intervention characteristics and comparing against the planned groups for each synthesis (item #5)).                                                                                 | 9-10                        |
|                               | 13b    | Describe any methods required to prepare the data for presentation or synthesis, such as handling of missing summary statistics, or data conversions.                                                                                                                                                | 10-11                       |
|                               | 13c    | Describe any methods used to tabulate or visually display results of individual studies and syntheses.                                                                                                                                                                                               | 10-11                       |
|                               | 13d    | Describe any methods used to synthesize results and provide a rationale for the choice(s). If meta-analysis was performed, describe the model(s), method(s) to identify the presence and extent of statistical heterogeneity, and software package(s) used.                                          | 10-11                       |
|                               | 13e    | Describe any methods used to explore possible causes of heterogeneity among study results (e.g. subgroup analysis, meta-regression).                                                                                                                                                                 | 11-12                       |
|                               | 13f    | Describe any sensitivity analyses conducted to assess robustness of the synthesized results.                                                                                                                                                                                                         | 11-12                       |
| Reporting bias assessment     | 14     | Describe any methods used to assess risk of bias due to missing results in a synthesis (arising from reporting biases).                                                                                                                                                                              | 12-13                       |
| Certainty assessment          | 15     | Describe any methods used to assess certainty (or confidence) in the body of evidence for an outcome.                                                                                                                                                                                                | 12-13                       |
| <b>RESULTS</b>                |        |                                                                                                                                                                                                                                                                                                      |                             |
| Study selection               | 16a    | Describe the results of the search and selection process, from the number of records identified in the search to the number of studies included in the review, ideally using a flow diagram.                                                                                                         | 14-15, Fig 1, eTab 2        |
|                               | 16b    | Cite studies that might appear to meet the inclusion criteria, but which were excluded, and explain why they were excluded.                                                                                                                                                                          | 14-15, eTab 4               |
| Study characteristics         | 17     | Cite each included study and present its characteristics.                                                                                                                                                                                                                                            | 14-15, eTab 5               |

| Section and Topic                              | Item # | Checklist item                                                                                                                                                                                                                                                                       | Page where item is reported |
|------------------------------------------------|--------|--------------------------------------------------------------------------------------------------------------------------------------------------------------------------------------------------------------------------------------------------------------------------------------|-----------------------------|
| Risk of bias in studies                        | 18     | Present assessments of risk of bias for each included study.                                                                                                                                                                                                                         | 14-15, eFig 4               |
| Results of individual studies                  | 19     | For all outcomes, present, for each study: (a) summary statistics for each group (where appropriate) and (b) an effect estimate and its precision (e.g. confidence/credible interval), ideally using structured tables or plots.                                                     | 14-15, eTab 5               |
| Results of syntheses                           | 20a    | For each synthesis, briefly summarise the characteristics and risk of bias among contributing studies.                                                                                                                                                                               | 15-16, Fig 2                |
|                                                | 20b    | Present results of all statistical syntheses conducted. If meta-analysis was done, present for each the summary estimate and its precision (e.g. confidence/credible interval) and measures of statistical heterogeneity. If comparing groups, describe the direction of the effect. | 15-16, Fig 3                |
|                                                | 20c    | Present results of all investigations of possible causes of heterogeneity among study results.                                                                                                                                                                                       | 15-16, eTab 8-9             |
|                                                | 20d    | Present results of all sensitivity analyses conducted to assess the robustness of the synthesized results.                                                                                                                                                                           | 16-17                       |
| Reporting biases                               | 21     | Present assessments of risk of bias due to missing results (arising from reporting biases) for each synthesis assessed.                                                                                                                                                              | 16-17, eFig 5               |
| Certainty of evidence                          | 22     | Present assessments of certainty (or confidence) in the body of evidence for each outcome assessed.                                                                                                                                                                                  | 16-17, eTab 10              |
| <b>DISCUSSION</b>                              |        |                                                                                                                                                                                                                                                                                      |                             |
| Discussion                                     | 23a    | Provide a general interpretation of the results in the context of other evidence.                                                                                                                                                                                                    | 18-20                       |
|                                                | 23b    | Discuss any limitations of the evidence included in the review.                                                                                                                                                                                                                      | 20-21                       |
|                                                | 23c    | Discuss any limitations of the review processes used.                                                                                                                                                                                                                                | 20-21                       |
|                                                | 23d    | Discuss implications of the results for practice, policy, and future research.                                                                                                                                                                                                       | 22                          |
| <b>OTHER INFORMATION</b>                       |        |                                                                                                                                                                                                                                                                                      |                             |
| Registration and protocol                      | 24a    | Provide registration information for the review, including register name and registration number, or state that the review was not registered.                                                                                                                                       | 5                           |
|                                                | 24b    | Indicate where the review protocol can be accessed, or state that a protocol was not prepared.                                                                                                                                                                                       | 5                           |
|                                                | 24c    | Describe and explain any amendments to information provided at registration or in the protocol.                                                                                                                                                                                      | 5                           |
| Support                                        | 25     | Describe sources of financial or non-financial support for the review, and the role of the funders or sponsors in the review.                                                                                                                                                        | 24                          |
| Competing interests                            | 26     | Declare any competing interests of review authors.                                                                                                                                                                                                                                   | 24                          |
| Availability of data, code and other materials | 27     | Report which of the following are publicly available and where they can be found: template data collection forms; data extracted from included studies; data used for all analyses; analytic code; any other materials used in the review.                                           | 24                          |

The current checklist followed the latest PRISMA 2020 guideline [1].

## Reference

[1] Page, M.J.; McKenzie, J.E.; Bossuyt, P.M.; Boutron, I.; Hoffmann, T.C.; Mulrow, C.D.; Shamseer, L.; Tetzlaff, J.M.; Akl, E.A.; Brennan, S.E.; Chou, R.; Glanville, J.; Grimshaw, J.M.; Hrobjartsson, A.; Lalu, M.M.; Li, T.; Loder, E.W.; Mayo-Wilson, E.; McDonald, S.; McGuinness, L.A.; Stewart, L.A.; Thomas, J.; Tricco, A.C.; Welch, V.A.; Whiting, P.; Moher, D. The PRISMA 2020 statement: an updated guideline for reporting systematic reviews. *BMJ*, **2021**, 372, n71.

**eTable 2: the keyword used in each database and search result**

Part of exogeneous melatonergic regimen

| Database         | Keyword                                                                                                                                                                                                                                                                                                                                                                                                                                                                                                                                                                                                                                                                                                                                                                                                                                                                                                                                                                                                                                                                               | Limit | Date      | Result |
|------------------|---------------------------------------------------------------------------------------------------------------------------------------------------------------------------------------------------------------------------------------------------------------------------------------------------------------------------------------------------------------------------------------------------------------------------------------------------------------------------------------------------------------------------------------------------------------------------------------------------------------------------------------------------------------------------------------------------------------------------------------------------------------------------------------------------------------------------------------------------------------------------------------------------------------------------------------------------------------------------------------------------------------------------------------------------------------------------------------|-------|-----------|--------|
| PubMed           | (Disease, Alzheimer OR Alzheimer Sclerosis OR Sclerosis, Alzheimer OR Alzheimer Syndrome OR Syndrome, Alzheimer OR Alzheimer Dementia OR Dementia, Alzheimer OR Alzheimer-Type Dementia OR Alzheimer Type Dementia OR Dementia, Alzheimer-Type OR Primary Senile Degenerative Dementia OR Dementia, Senile OR Senile Dementia OR Dementia, Alzheimer Type OR Alzheimer Type Dementia OR Senile Dementia, Alzheimer Type OR Alzheimer Type Senile Dementia OR Dementia, Primary Senile Degenerative OR Alzheimer's Disease OR Disease, Alzheimer's OR Acute Confusional Senile Dementia OR Senile Dementia, Acute Confusional OR Dementia, Presenile OR Presenile Dementia OR Alzheimer Disease, Late Onset OR Late Onset Alzheimer Disease OR Alzheimer's Disease, Focal Onset OR Focal Onset Alzheimer's Disease OR Familial Alzheimer Disease OR Alzheimer Disease, Early Onset OR Early Onset Alzheimer Disease OR Presenile Alzheimer Dementia) AND (Mélatonine OR melatonin OR tasimelteon OR ramelteon OR agomelatine OR melatonin receptor agonist) AND (random OR randomized) | NA    | 2021/8/19 | 37     |
| ClinicalKey      | (Alzheimer disease OR dementia OR Alzheimer dementia) AND (Mélatonine OR Melatonin) AND (random OR randomized)                                                                                                                                                                                                                                                                                                                                                                                                                                                                                                                                                                                                                                                                                                                                                                                                                                                                                                                                                                        | NA    | 2021/8/19 | 39     |
| Cochrane CENTRAL | (Disease, Alzheimer OR Alzheimer Sclerosis OR Sclerosis, Alzheimer OR Alzheimer Syndrome OR Syndrome, Alzheimer OR Alzheimer Dementia OR Dementia, Alzheimer                                                                                                                                                                                                                                                                                                                                                                                                                                                                                                                                                                                                                                                                                                                                                                                                                                                                                                                          | NA    | 2021/8/19 | 24     |

OR Alzheimer-Type Dementia OR Alzheimer Type Dementia OR Dementia, Alzheimer-Type OR Primary Senile Degenerative Dementia OR Dementia, Senile OR Senile Dementia OR Dementia, Alzheimer Type OR Alzheimer Type Dementia OR Senile Dementia, Alzheimer Type OR Alzheimer Type Senile Dementia OR Dementia, Primary Senile Degenerative OR Alzheimer's Disease OR Disease, Alzheimer's OR Acute Confusional Senile Dementia OR Senile Dementia, Acute Confusional OR Dementia, Presenile OR Presenile Dementia OR Alzheimer Disease, Late Onset OR Late Onset Alzheimer Disease OR Alzheimer's Disease, Focal Onset OR Focal Onset Alzheimer's Disease OR Familial Alzheimer Disease OR Alzheimer Disease, Early Onset OR Early Onset Alzheimer Disease OR Presenile Alzheimer Dementia) AND (Mélatonine OR melatonin OR tasimelteon OR ramelteon OR agomelatine OR melatonin receptor agonist) AND (random OR randomized)

Embase

(Alzheimer disease OR dementia OR Alzheimer dementia) AND (Mélatonine OR Melatonin OR tasimelteon OR ramelteon OR agomelatine OR melatonin receptor agonist) AND (random OR randomized)

NA

2021/8/19 199

ProQuest

(Disease, Alzheimer OR Alzheimer Sclerosis OR Sclerosis, Alzheimer OR Alzheimer Syndrome OR Syndrome, Alzheimer OR Alzheimer Dementia OR Dementia, Alzheimer OR Alzheimer-Type Dementia OR Alzheimer Type Dementia OR Dementia, Alzheimer-Type OR Primary Senile Degenerative Dementia OR Dementia, Senile OR Senile Dementia OR Dementia, Alzheimer Type OR Alzheimer Type Dementia OR Senile Dementia, Alzheimer Type OR Alzheimer Type Senile Dementia OR Dementia, Primary Senile Degenerative OR Alzheimer's Disease OR Disease, Alzheimer's OR Acute

NA

2021/8/19 2143

|                |                                                                                                                                                                                                                                                                                                                                                                                                                                                                                                                                                                                                                                                                                                                                                                                                                                                                                                                                                                                                                                                                                       |                  |           |     |
|----------------|---------------------------------------------------------------------------------------------------------------------------------------------------------------------------------------------------------------------------------------------------------------------------------------------------------------------------------------------------------------------------------------------------------------------------------------------------------------------------------------------------------------------------------------------------------------------------------------------------------------------------------------------------------------------------------------------------------------------------------------------------------------------------------------------------------------------------------------------------------------------------------------------------------------------------------------------------------------------------------------------------------------------------------------------------------------------------------------|------------------|-----------|-----|
|                | Confusional Senile Dementia OR Senile Dementia, Acute Confusional OR Dementia, Presenile OR Presenile Dementia OR Alzheimer Disease, Late Onset OR Late Onset Alzheimer Disease OR Alzheimer's Disease, Focal Onset OR Focal Onset Alzheimer's Disease OR Familial Alzheimer Disease OR Alzheimer Disease, Early Onset OR Early Onset Alzheimer Disease OR Presenile Alzheimer Dementia) AND (Mélatonine OR Melatonin) AND (random OR randomized)                                                                                                                                                                                                                                                                                                                                                                                                                                                                                                                                                                                                                                     |                  |           |     |
| ScienceDirect  | (Alzheimer disease OR dementia OR Alzheimer dementia) AND (Mélatonine OR Melatonin) AND (random OR randomized)                                                                                                                                                                                                                                                                                                                                                                                                                                                                                                                                                                                                                                                                                                                                                                                                                                                                                                                                                                        | research article | 2021/8/19 | 766 |
| Web of Science | (Disease, Alzheimer OR Alzheimer Sclerosis OR Sclerosis, Alzheimer OR Alzheimer Syndrome OR Syndrome, Alzheimer OR Alzheimer Dementia OR Dementia, Alzheimer OR Alzheimer-Type Dementia OR Alzheimer Type Dementia OR Dementia, Alzheimer-Type OR Primary Senile Degenerative Dementia OR Dementia, Senile OR Senile Dementia OR Dementia, Alzheimer Type OR Alzheimer Type Dementia OR Senile Dementia, Alzheimer Type OR Alzheimer Type Senile Dementia OR Dementia, Primary Senile Degenerative OR Alzheimer's Disease OR Disease, Alzheimer's OR Acute Confusional Senile Dementia OR Senile Dementia, Acute Confusional OR Dementia, Presenile OR Presenile Dementia OR Alzheimer Disease, Late Onset OR Late Onset Alzheimer Disease OR Alzheimer's Disease, Focal Onset OR Focal Onset Alzheimer's Disease OR Familial Alzheimer Disease OR Alzheimer Disease, Early Onset OR Early Onset Alzheimer Disease OR Presenile Alzheimer Dementia) AND (Mélatonine OR melatonin OR tasimelteon OR ramelteon OR agomelatine OR melatonin receptor agonist) AND (random OR randomized) | NA               | 2021/8/19 | 83  |

|                    |                                                                                                                                                                                         |    |           |   |
|--------------------|-----------------------------------------------------------------------------------------------------------------------------------------------------------------------------------------|----|-----------|---|
| ClinicalTrials.gov | (Alzheimer disease OR dementia OR Alzheimer dementia) AND (Mélatonine OR Melatonin OR tasimelteon OR ramelteon OR agomelatine OR melatonin receptor agonist) AND (random OR randomized) | NA | 2021/8/19 | 5 |
|--------------------|-----------------------------------------------------------------------------------------------------------------------------------------------------------------------------------------|----|-----------|---|

Part of extra search for FDA approval agents

| Database    | Keyword                                                                                                                                                                                                                                                                                                                                                                                                                                                                                                                                                                                                                                                                                                                                                                                                                                                                                                                                                                                                                                                                                                          | Limit | Date      | Result |
|-------------|------------------------------------------------------------------------------------------------------------------------------------------------------------------------------------------------------------------------------------------------------------------------------------------------------------------------------------------------------------------------------------------------------------------------------------------------------------------------------------------------------------------------------------------------------------------------------------------------------------------------------------------------------------------------------------------------------------------------------------------------------------------------------------------------------------------------------------------------------------------------------------------------------------------------------------------------------------------------------------------------------------------------------------------------------------------------------------------------------------------|-------|-----------|--------|
| PubMed      | (Disease, Alzheimer OR Alzheimer Sclerosis OR Sclerosis, Alzheimer OR Alzheimer Syndrome OR Syndrome, Alzheimer OR Alzheimer Dementia OR Dementia, Alzheimer OR Alzheimer-Type Dementia OR Alzheimer Type Dementia OR Dementia, Alzheimer-Type OR Primary Senile Degenerative Dementia OR Dementia, Senile OR Senile Dementia OR Dementia, Alzheimer Type OR Alzheimer Type Dementia OR Senile Dementia, Alzheimer Type OR Alzheimer Type Senile Dementia OR Dementia, Primary Senile Degenerative OR Alzheimer's Disease OR Disease, Alzheimer's OR Acute Confusional Senile Dementia OR Senile Dementia, Acute Confusional OR Dementia, Presenile OR Presenile Dementia OR Alzheimer Disease, Late Onset OR Late Onset Alzheimer Disease OR Alzheimer's Disease, Focal Onset OR Focal Onset Alzheimer's Disease OR Familial Alzheimer Disease OR Alzheimer Disease, Early Onset OR Early Onset Alzheimer Disease OR Presenile Alzheimer Dementia) AND (donepezil OR Aricept OR galantamine OR Razadyne OR rivastigmine OR Exelon OR memantine OR Namenda OR Namzaric) AND (random OR randomized OR randomised) | NA    | 2021/8/19 | 1146   |
| ClinicalKey | (Disease, Alzheimer OR Alzheimer Sclerosis OR Sclerosis, Alzheimer OR Alzheimer Syndrome OR Syndrome, Alzheimer OR Alzheimer Dementia OR Dementia, Alzheimer                                                                                                                                                                                                                                                                                                                                                                                                                                                                                                                                                                                                                                                                                                                                                                                                                                                                                                                                                     | NA    | 2021/8/19 | 2      |

---

OR Alzheimer-Type Dementia OR Alzheimer Type Dementia OR Dementia, Alzheimer-Type OR Primary Senile Degenerative Dementia OR Dementia, Senile OR Senile Dementia OR Dementia, Alzheimer Type OR Alzheimer Type Dementia OR Senile Dementia, Alzheimer Type OR Alzheimer Type Senile Dementia OR Dementia, Primary Senile Degenerative OR Alzheimer's Disease OR Disease, Alzheimer's OR Acute Confusional Senile Dementia OR Senile Dementia, Acute Confusional OR Dementia, Presenile OR Presenile Dementia OR Alzheimer Disease, Late Onset OR Late Onset Alzheimer Disease OR Alzheimer's Disease, Focal Onset OR Focal Onset Alzheimer's Disease OR Familial Alzheimer Disease OR Alzheimer Disease, Early Onset OR Early Onset Alzheimer Disease OR Presenile Alzheimer Dementia) AND (donepezil OR Aricept OR galantamine OR Razadyne OR rivastigmine OR Exelon OR memantine OR Namenda OR Namzaric) AND (random OR randomized OR randomised)

---

|                  |                                                                                                                                                                                                                                                                                                                                                                                                                                                                                                                                                                                                                                                                                                                                                                                                           |    |           |      |
|------------------|-----------------------------------------------------------------------------------------------------------------------------------------------------------------------------------------------------------------------------------------------------------------------------------------------------------------------------------------------------------------------------------------------------------------------------------------------------------------------------------------------------------------------------------------------------------------------------------------------------------------------------------------------------------------------------------------------------------------------------------------------------------------------------------------------------------|----|-----------|------|
| Cochrane CENTRAL | (Disease, Alzheimer OR Alzheimer Sclerosis OR Sclerosis, Alzheimer OR Alzheimer Syndrome OR Syndrome, Alzheimer OR Alzheimer Dementia OR Dementia, Alzheimer OR Alzheimer-Type Dementia OR Alzheimer Type Dementia OR Dementia, Alzheimer-Type OR Primary Senile Degenerative Dementia OR Dementia, Senile OR Senile Dementia OR Dementia, Alzheimer Type OR Alzheimer Type Dementia OR Senile Dementia, Alzheimer Type OR Alzheimer Type Senile Dementia OR Dementia, Primary Senile Degenerative OR Alzheimer's Disease OR Disease, Alzheimer's OR Acute Confusional Senile Dementia OR Senile Dementia, Acute Confusional OR Dementia, Presenile OR Presenile Dementia OR Alzheimer Disease, Late Onset OR Late Onset Alzheimer Disease OR Alzheimer's Disease, Focal Onset OR Focal Onset Alzheimer's | NA | 2021/8/19 | 1383 |
|------------------|-----------------------------------------------------------------------------------------------------------------------------------------------------------------------------------------------------------------------------------------------------------------------------------------------------------------------------------------------------------------------------------------------------------------------------------------------------------------------------------------------------------------------------------------------------------------------------------------------------------------------------------------------------------------------------------------------------------------------------------------------------------------------------------------------------------|----|-----------|------|

---



|               |                                                                                                                                                                                                                                                                                                                                                                                                                                                                                                                                                                                                                                                                                                                                                                                                                                                                                                                                                                                                                                                                                                                  |          |           |      |
|---------------|------------------------------------------------------------------------------------------------------------------------------------------------------------------------------------------------------------------------------------------------------------------------------------------------------------------------------------------------------------------------------------------------------------------------------------------------------------------------------------------------------------------------------------------------------------------------------------------------------------------------------------------------------------------------------------------------------------------------------------------------------------------------------------------------------------------------------------------------------------------------------------------------------------------------------------------------------------------------------------------------------------------------------------------------------------------------------------------------------------------|----------|-----------|------|
|               | Disease OR Familial Alzheimer Disease OR Alzheimer Disease, Early Onset OR Early Onset Alzheimer Disease OR Presenile Alzheimer Dementia) AND (donepezil OR Aricept OR galantamine OR Razadyne OR rivastigmine OR Exelon OR memantine OR Namenda OR Namzaric) AND (random OR randomized OR randomised)                                                                                                                                                                                                                                                                                                                                                                                                                                                                                                                                                                                                                                                                                                                                                                                                           |          |           |      |
| Embase        | (Alzheimer disease OR dementia OR Alzheimer dementia) AND (donepezil OR Aricept OR galantamine OR Razadyne OR rivastigmine OR Exelon OR memantine OR Namenda OR Namzaric) AND (random OR randomized OR randomised)                                                                                                                                                                                                                                                                                                                                                                                                                                                                                                                                                                                                                                                                                                                                                                                                                                                                                               | NA       | 2021/8/19 | 2672 |
| ProQuest      | (Disease, Alzheimer OR Alzheimer Sclerosis OR Sclerosis, Alzheimer OR Alzheimer Syndrome OR Syndrome, Alzheimer OR Alzheimer Dementia OR Dementia, Alzheimer OR Alzheimer-Type Dementia OR Alzheimer Type Dementia OR Dementia, Alzheimer-Type OR Primary Senile Degenerative Dementia OR Dementia, Senile OR Senile Dementia OR Dementia, Alzheimer Type OR Alzheimer Type Dementia OR Senile Dementia, Alzheimer Type OR Alzheimer Type Senile Dementia OR Dementia, Primary Senile Degenerative OR Alzheimer's Disease OR Disease, Alzheimer's OR Acute Confusional Senile Dementia OR Senile Dementia, Acute Confusional OR Dementia, Presenile OR Presenile Dementia OR Alzheimer Disease, Late Onset OR Late Onset Alzheimer Disease OR Alzheimer's Disease, Focal Onset OR Focal Onset Alzheimer's Disease OR Familial Alzheimer Disease OR Alzheimer Disease, Early Onset OR Early Onset Alzheimer Disease OR Presenile Alzheimer Dementia) AND (donepezil OR Aricept OR galantamine OR Razadyne OR rivastigmine OR Exelon OR memantine OR Namenda OR Namzaric) AND (random OR randomized OR randomised) | NA       | 2021/8/19 | 2971 |
| ScienceDirect | (Alzheimer) AND (donepezil OR galantamine OR rivastigmine OR memantine) AND                                                                                                                                                                                                                                                                                                                                                                                                                                                                                                                                                                                                                                                                                                                                                                                                                                                                                                                                                                                                                                      | research | 2021/8/19 | 2290 |

|                    |                                                                                                                                                                                                                    |         |           |     |
|--------------------|--------------------------------------------------------------------------------------------------------------------------------------------------------------------------------------------------------------------|---------|-----------|-----|
|                    | (random)                                                                                                                                                                                                           | article |           |     |
| Web of Science     | (Alzheimer) AND (donepezil OR galantamine OR rivastigmine OR memantine) AND (random)                                                                                                                               | NA      | 2021/8/19 | 51  |
| ClinicalTrials.gov | (Alzheimer disease OR dementia OR Alzheimer dementia) AND (donepezil OR Aricept OR galantamine OR Razadyne OR rivastigmine OR Exelon OR memantine OR Namenda OR Namzaric) AND (random OR randomized OR randomised) | NA      | 2021/8/19 | 105 |

Abbreviation: NA: not apply

**eTable 3: subgroup of different dosage of individual regimen**

| Regimen              | Subgroup          | Range                                                 |
|----------------------|-------------------|-------------------------------------------------------|
| Galantamine          | low dose          | less or equal to 16mg/day                             |
|                      | medium dose       | more than 16 mg/day but less or equal to 24 mg/day    |
|                      | high dose         | more than 24 mg/day                                   |
| Rivastigmine capsule | low dose          | less or equal to 4 mg/day                             |
|                      | medium dose       | more than 4 mg/day but less or equal to 6 mg/day      |
|                      | high dose         | more than 6 mg/day but less or equal to 12 mg/day     |
| Rivastigmine patch   | low dose          | less or equal to 4.6 mg/day                           |
|                      | high dose         | more than 4.6 mg/day but less or equal to 13.3 mg/day |
|                      | extreme high dose | more than 13.3 mg/day                                 |
| Memantine            | high dose         | less or equal to 20 mg/day                            |
|                      | extreme high dose | more than 20 mg/day                                   |
| Donepezil            | medium dose       | less or equal to 5 mg/day                             |
|                      | high dose         | more than 5 mg/day but less or equal to 10 mg/day     |
|                      | extreme high dose | more than 10 mg/day                                   |
| Melatonin            | low dose          | less or equal to 3 mg/day                             |
|                      | medium dose       | more than 5 mg/day but less than 10 mg/day            |
|                      | high dose         | at least 10 mg/day                                    |

Subgrouping according to Dou KX, et al (2018)[1]

**Reference:**

[1] Dou, K.X.; Tan, M.S.; Tan, C.C.; Cao, X.P.; Hou, X.H.; Guo, Q.H.; Tan, L.; Mok, V.; Yu, J.T. Comparative safety and effectiveness of cholinesterase inhibitors and memantine for Alzheimer's disease: a network meta-analysis of 41 randomized controlled trials. *Alzheimers Res Ther*, **2018**, *10*(1), 126.

**eTable 4: Excluded studies and reason**

| Reason (numbers)<br>References                                                                         | Numbers | References |
|--------------------------------------------------------------------------------------------------------|---------|------------|
| All patients had received donepezil at baseline and selected patients with poor response to donepezil  | 1       | [1]        |
| Applied wide range dosage of rivastigmine but not a specific dosage (range 2-12 mg/day in this study)  | 2       | [2, 3]     |
| Comparison of different titration method but not different medication                                  | 1       | [4]        |
| Duplicate sample source                                                                                | 4       | [5-8]      |
| Exclude patients with definite dementia                                                                | 6       | [9-14]     |
| Investigate additional citalopram to memantine but not to compare medication of interest               | 1       | [15]       |
| Investigate to withdraw medication but not prescription of medication                                  | 3       | [16-18]    |
| Lack of adequate control                                                                               | 1       | [19]       |
| Meta-analysis                                                                                          | 10      | [20-31]    |
| Mixed different and wide-range dosage of memantine into one group                                      | 1       | [32]       |
| Network meta-analysis                                                                                  | 3       | [33-35]    |
| Not randomized controlled trials                                                                       | 4       | [36-39]    |
| Not randomized to the different galantamine dose group                                                 | 1       | [40]       |
| Not related to medication of interest                                                                  | 18      | [41-58]    |
| Not related to target outcome                                                                          | 5       | [59-63]    |
| Only provide baseline demographic data of cognition but not provide the post-treatment cognition level | 1       | [64]       |
| Review article                                                                                         | 5       | [65-70]    |
| Selected patients with poor response to rivastigmine patch                                             | 1       | [71]       |

## References:

- [1] Johannsen, P.; Salmon, E.; Hampel, H.; Xu, Y.; Richardson, S.; Qvitzau, S.; Schindler, R.; Group, A.S. Assessing therapeutic efficacy in a progressive disease: a study of donepezil in Alzheimer's disease. *CNS Drugs*, **2006**, *20*(4), 311-325.
- [2] Feldman, H.H.; Lane, R.; Study, G. Rivastigmine: a placebo controlled trial of twice daily and three times daily regimens in patients with Alzheimer's disease. *J Neurol Neurosurg Psychiatry*, **2007**, *78*(10), 1056-1063.
- [3] Bullock, R.; Touchon, J.; Bergman, H.; Gambina, G.; He, Y.; Rapatz, G.; Nagel, J.; Lane, R. Rivastigmine and donepezil treatment in moderate to moderately-severe Alzheimer's disease over a 2-year period. *Curr Med Res Opin*, **2005**, *21*(8), 1317-1327.
- [4] Hong, Y.J.; Han, H.J.; Youn, Y.C.; Park, K.W.; Yang, D.W.; Kim, S.; Kim, H.J.; Kim, J.E.; Lee, J.H.; study, O. Safety and tolerability of donepezil 23 mg with or without intermediate dose titration in patients with Alzheimer's disease taking donepezil 10 mg: a multicenter, randomized, open-label, parallel-design, three-arm, prospective trial. *Alzheimers Res Ther*, **2019**, *11*(1), 37.
- [5] Grossberg, G.T.; Alva, G.; Hendrix, S.; Ellison, N.; Kane, M.C.; Edwards, J. Memantine ER Maintains Patient Response in Moderate to Severe Alzheimer's Disease: Post Hoc Analyses From a Randomized, Controlled, Clinical Trial of Patients Treated With Cholinesterase Inhibitors. *Alzheimer Dis Assoc Disord*, **2018**, *32*(3), 173-178.
- [6] Winblad, B.; Grossberg, G.; Frolich, L.; Farlow, M.; Zechner, S.; Nagel, J.; Lane, R. IDEAL: a 6-month, double-blind, placebo-controlled study of the first skin patch for Alzheimer disease. *Neurology*, **2007**, *69*(4 Suppl 1), S14-22.
- [7] Reisberg, B.; Doody, R.; Stoffler, A.; Schmitt, F.; Ferris, S.; Mobius, H.J. A 24-week open-label extension study of memantine in moderate to severe Alzheimer disease. *Arch Neurol*, **2006**, *63*(1), 49-54.
- [8] Rogers, S.L.; Doody, R.S.; Mohs, R.C.; Friedhoff, L.T. Donepezil improves cognition and global function in Alzheimer disease: a 15-week, double-blind, placebo-controlled study. Donepezil Study Group. *Arch Intern Med*, **1998**, *158*(9), 1021-1031.
- [9] Montero-Odasso, M.; Speechley, M.; Chertkow, H.; Sarquis-Adamson, Y.; Wells, J.; Borrie, M.; Vanderhaeghe, L.; Zou, G.Y.; Fraser, S.; Bherer,

- L.; Muir-Hunter, S.W. Donepezil for gait and falls in mild cognitive impairment: a randomized controlled trial. *Eur J Neurol*, **2019**, *26*(4), 651-659.
- [10] Fan, Y.; Yuan, L.; Ji, M.; Yang, J.; Gao, D. The effect of melatonin on early postoperative cognitive decline in elderly patients undergoing hip arthroplasty: A randomized controlled trial. *J Clin Anesth*, **2017**, *39*, 77-81.
- [11] Rondanelli, M.; Opizzi, A.; Faliva, M.; Mozzoni, M.; Antonello, N.; Cazzola, R.; Savare, R.; Cerutti, R.; Grossi, E.; Cestaro, B. Effects of a diet integration with an oily emulsion of DHA-phospholipids containing melatonin and tryptophan in elderly patients suffering from mild cognitive impairment. *Nutr Neurosci*, **2012**, *15*(2), 46-54.
- [12] Garzon, C.; Guerrero, J.M.; Aramburu, O.; Guzman, T. Effect of melatonin administration on sleep, behavioral disorders and hypnotic drug discontinuation in the elderly: a randomized, double-blind, placebo-controlled study. *Aging Clin Exp Res*, **2009**, *21*(1), 38-42.
- [13] Petersen, R.C.; Thomas, R.G.; Grundman, M.; Bennett, D.; Doody, R.; Ferris, S.; Galasko, D.; Jin, S.; Kaye, J.; Levey, A.; Pfeiffer, E.; Sano, M.; van Dyck, C.H.; Thal, L.J.; Alzheimer's Disease Cooperative Study, G. Vitamin E and donepezil for the treatment of mild cognitive impairment. *N Engl J Med*, **2005**, *352*(23), 2379-2388.
- [14] Hamdieh, M.; Abbasinazari, M.; Badri, T.; Saberi-Isfeedvajani, M.; Arzani, G. The impact of melatonin on the alleviation of cognitive impairment during electroconvulsive therapy: A double-blind controlled trial. *Neurology, Psychiatry and Brain Research*, **2017**, *24*, 30-34.
- [15] Zhou, T.; Wang, J.; Xin, C.; Kong, L.; Wang, C. Effect of memantine combined with citalopram on cognition of BPSD and moderate Alzheimer's disease: A clinical trial. *Exp Ther Med*, **2019**, *17*(3), 1625-1630.
- [16] Soler, A.; Amer, G.; Leiva, A.; Ripoll, J.; Llorente, M.A.; Leiva, A.; Taltavull, J.M.; Molina, R.; Llobera, J. Continuation versus discontinuation of treatment for severe dementia: randomized, pragmatic, open-label, clinical trial to evaluate the efficacy of continuing drug treatment in patients with severe dementia (STOP-DEM). *BMC Geriatr*, **2019**, *19*(1), 101.
- [17] Hong, Y.J.; Choi, S.H.; Jeong, J.H.; Park, K.W.; Na, H.R. Effectiveness of Anti-Dementia Drugs in Extremely Severe Alzheimer's Disease: A 12-Week, Multicenter, Randomized, Single-Blind Study. *J Alzheimers Dis*, **2018**, *63*(3), 1035-1044.
- [18] Howard, R.; McShane, R.; Lindesay, J.; Ritchie, C.; Baldwin, A.; Barber, R.; Burns, A.; Denning, T.; Findlay, D.; Holmes, C.; Hughes, A.; Jacoby, R.; Jones, R.; Jones, R.; McKeith, I.; Macharouthu, A.; O'Brien, J.; Passmore, P.; Sheehan, B.; Juszcak, E.; Katona, C.; Hills, R.; Knapp, M.; Ballard, C.; Brown, R.; Banerjee, S.; Onions, C.; Griffin, M.; Adams, J.; Gray, R.; Johnson, T.; Bentham, P.; Phillips, P. Donepezil and memantine for

moderate-to-severe Alzheimer's disease. *N Engl J Med*, **2012**, 366(10), 893-903.

[19] Connelly, P.J.; Prentice, N.P.; Cousland, G.; Bonham, J. A randomised double-blind placebo-controlled trial of folic acid supplementation of cholinesterase inhibitors in Alzheimer's disease. *Int J Geriatr Psychiatry*, **2008**, 23(2), 155-160.

[20] Glinz, D.; Gloy, V.L.; Monsch, A.U.; Kressig, R.W.; Patel, C.; McCord, K.A.; Ademi, Z.; Tomonaga, Y.; Schwenkglens, M.; Bucher, H.C.; Raatz, H. Acetylcholinesterase inhibitors combined with memantine for moderate to severe Alzheimer's disease: a meta-analysis. *Swiss Med Wkly*, **2019**, 149, w20093.

[21] Li, D.D.; Zhang, Y.H.; Zhang, W.; Zhao, P. Meta-Analysis of Randomized Controlled Trials on the Efficacy and Safety of Donepezil, Galantamine, Rivastigmine, and Memantine for the Treatment of Alzheimer's Disease. *Front Neurosci*, **2019**, 13, 472.

[22] McShane, R.; Westby, M.J.; Roberts, E.; Minakaran, N.; Schneider, L.; Farrimond, L.E.; Maayan, N.; Ware, J.; Debarros, J. Memantine for dementia. *Cochrane Database Syst Rev*, **2019**, 3, CD003154.

[23] Birks, J.S.; Harvey, R.J. Donepezil for dementia due to Alzheimer's disease. *Cochrane Database Syst Rev*, **2018**, 6, CD001190.

[24] Kishi, T.; Matsunaga, S.; Iwata, N. The effects of memantine on behavioral disturbances in patients with Alzheimer's disease: a meta-analysis. *Neuropsychiatr Dis Treat*, **2017**, 13, 1909-1928.

[25] McCleery, J.; Cohen, D.A.; Sharpley, A.L. Pharmacotherapies for sleep disturbances in dementia. *Cochrane Database Syst Rev*, **2016**, 11, CD009178.

[26] Wang, Y.Y.; Zheng, W.; Ng, C.H.; Ungvari, G.S.; Wei, W.; Xiang, Y.T. Meta-analysis of randomized, double-blind, placebo-controlled trials of melatonin in Alzheimer's disease. *Int J Geriatr Psychiatry*, **2017**, 32(1), 50-57.

[27] Zhang, W.; Chen, X.Y.; Su, S.W.; Jia, Q.Z.; Ding, T.; Zhu, Z.N.; Zhang, T. Exogenous melatonin for sleep disorders in neurodegenerative diseases: a meta-analysis of randomized clinical trials. *Neurol Sci*, **2016**, 37(1), 57-65.

[28] Xu, J.; Wang, L.L.; Dammer, E.B.; Li, C.B.; Xu, G.; Chen, S.D.; Wang, G. Melatonin for sleep disorders and cognition in dementia: a meta-analysis of randomized controlled trials. *Am J Alzheimers Dis Other Demen*, **2015**, 30(5), 439-447.

[29] McCleery, J.; Cohen, D.A.; Sharpley, A.L. Pharmacotherapies for sleep disturbances in Alzheimer's disease. *Cochrane Database Syst Rev*, **2014**, (3), CD009178.

- [30] Sumsuzzman, D.M.; Choi, J.; Jin, Y.; Hong, Y. Neurocognitive effects of melatonin treatment in healthy adults and individuals with Alzheimer's disease and insomnia: A systematic review and meta-analysis of randomized controlled trials. *Neurosci Biobehav Rev*, **2021**, *127*, 459-473.
- [31] McCleery, J.; Sharpley, A.L. Pharmacotherapies for sleep disturbances in dementia. *Cochrane Database Syst Rev*, **2020**, *11*, CD009178.
- [32] Nakamura, Y.; Kitamura, S.; Homma, A.; Shiosakai, K.; Matsui, D. Efficacy and safety of memantine in patients with moderate-to-severe Alzheimer's disease: results of a pooled analysis of two randomized, double-blind, placebo-controlled trials in Japan. *Expert Opin Pharmacother*, **2014**, *15*(7), 913-925.
- [33] Cui, C.C.; Sun, Y.; Wang, X.Y.; Zhang, Y.; Xing, Y. The effect of anti-dementia drugs on Alzheimer disease-induced cognitive impairment: A network meta-analysis. *Medicine (Baltimore)*, **2019**, *98*(27), e16091.
- [34] Thancharoen, O.; Limwattananon, C.; Waleekhachonloet, O.; Rattanachotphanit, T.; Limwattananon, P.; Limpawattana, P. Ginkgo biloba Extract (EGb761), Cholinesterase Inhibitors, and Memantine for the Treatment of Mild-to-Moderate Alzheimer's Disease: A Network Meta-Analysis. *Drugs Aging*, **2019**, *36*(5), 435-452.
- [35] Dou, K.X.; Tan, M.S.; Tan, C.C.; Cao, X.P.; Hou, X.H.; Guo, Q.H.; Tan, L.; Mok, V.; Yu, J.T. Comparative safety and effectiveness of cholinesterase inhibitors and memantine for Alzheimer's disease: a network meta-analysis of 41 randomized controlled trials. *Alzheimers Res Ther*, **2018**, *10*(1), 126.
- [36] Manni, R.; Cremascoli, R.; Perretti, C.; De Icco, R.; Picascia, M.; Ghezzi, C.; Cerri, S.; Sinforiani, E.; Terzaghi, M. Evening melatonin timing secretion in real life conditions in patients with Alzheimer disease of mild to moderate severity. *Sleep Med*, **2019**, *63*, 122-126.
- [37] Huisa, B.N.; Thomas, R.G.; Jin, S.; Oltersdorf, T.; Taylor, C.; Feldman, H.H. Memantine and Acetylcholinesterase Inhibitor Use in Alzheimer's Disease Clinical Trials: Potential for Confounding by Indication. *J Alzheimers Dis*, **2019**, *67*(2), 707-713.
- [38] Devore, E.E.; Harrison, S.L.; Stone, K.L.; Holton, K.F.; Barrett-Connor, E.; Ancoli-Israel, S.; Yaffe, K.; Ensrud, K.; Cawthon, P.M.; Redline, S.; Orwoll, E.; Schernhammer, E.S.; Osteoporotic Fractures in Men Study Research, G. Association of urinary melatonin levels and aging-related outcomes in older men. *Sleep Med*, **2016**, *23*, 73-80.
- [39] Santoro, A.; Siviero, P.; Minicuci, N.; Bellavista, E.; Mishto, M.; Olivieri, F.; Marchegiani, F.; Chiamenti, A.M.; Benussi, L.; Ghidoni, R.;



- Nacmias, B.; Bagnoli, S.; Ginestroni, A.; Scarpino, O.; Feraco, E.; Gianni, W.; Cruciani, G.; Paganelli, R.; Di Iorio, A.; Scognamiglio, M.; Grimaldi, L.M.; Gabelli, C.; Sorbi, S.; Binetti, G.; Crepaldi, G.; Franceschi, C. Effects of donepezil, galantamine and rivastigmine in 938 Italian patients with Alzheimer's disease: a prospective, observational study. *CNS Drugs*, **2010**, *24*(2), 163-176.
- [40] Rockwood, K.; Mintzer, J.; Truyen, L.; Wessel, T.; Wilkinson, D. Effects of a flexible galantamine dose in Alzheimer's disease: a randomised, controlled trial. *J Neurol Neurosurg Psychiatry*, **2001**, *71*(5), 589-595.
- [41] Fullerton, T.; Binneman, B.; David, W.; Delnomdedieu, M.; Kupiec, J.; Lockwood, P.; Mancuso, J.; Miceli, J.; Bell, J. A Phase 2 clinical trial of PF-05212377 (SAM-760) in subjects with mild to moderate Alzheimer's disease with existing neuropsychiatric symptoms on a stable daily dose of donepezil. *Alzheimers Res Ther*, **2018**, *10*(1), 38.
- [42] Gault, L.M.; Lenz, R.A.; Ritchie, C.W.; Meier, A.; Othman, A.A.; Tang, Q.; Berry, S.; Pritchett, Y.; Robieson, W.Z. ABT-126 monotherapy in mild-to-moderate Alzheimer's dementia: randomized double-blind, placebo and active controlled adaptive trial and open-label extension. *Alzheimers Res Ther*, **2016**, *8*(1), 44.
- [43] Gault, L.M.; Ritchie, C.W.; Robieson, W.Z.; Pritchett, Y.; Othman, A.A.; Lenz, R.A. A phase 2 randomized, controlled trial of the alpha7 agonist ABT-126 in mild-to-moderate Alzheimer's dementia. *Alzheimers Dement (N Y)*, **2015**, *1*(1), 81-90.
- [44] Haig, G.M.; Pritchett, Y.; Meier, A.; Othman, A.A.; Hall, C.; Gault, L.M.; Lenz, R.A. A randomized study of H3 antagonist ABT-288 in mild-to-moderate Alzheimer's dementia. *J Alzheimers Dis*, **2014**, *42*(3), 959-971.
- [45] Sano, M.; Bell, K.L.; Galasko, D.; Galvin, J.E.; Thomas, R.G.; van Dyck, C.H.; Aisen, P.S. A randomized, double-blind, placebo-controlled trial of simvastatin to treat Alzheimer disease. *Neurology*, **2011**, *77*(6), 556-563.
- [46] Maher-Edwards, G.; Zvartau-Hind, M.; Hunter, A.J.; Gold, M.; Hopton, G.; Jacobs, G.; Davy, M.; Williams, P. Double-blind, controlled phase II study of a 5-HT<sub>6</sub> receptor antagonist, SB-742457, in Alzheimer's disease. *Curr Alzheimer Res*, **2010**, *7*(5), 374-385.
- [47] Doody, R.S.; Gavrilova, S.I.; Sano, M.; Thomas, R.G.; Aisen, P.S.; Bachurin, S.O.; Seely, L.; Hung, D.; dimebon, i. Effect of dimebon on cognition, activities of daily living, behaviour, and global function in patients with mild-to-moderate Alzheimer's disease: a randomised, double-blind, placebo-controlled study. *Lancet*, **2008**, *372*(9634), 207-215.
- [48] Mintzer, J.E.; Tune, L.E.; Breder, C.D.; Swanink, R.; Marcus, R.N.; McQuade, R.D.; Forbes, A. Aripiprazole for the treatment of psychoses in

institutionalized patients with Alzheimer dementia: a multicenter, randomized, double-blind, placebo-controlled assessment of three fixed doses. *Am J Geriatr Psychiatry*, **2007**, *15*(11), 918-931.

[49] Zhang, Z.; Wang, X.; Chen, Q.; Shu, L.; Wang, J.; Shan, G. [Clinical efficacy and safety of huperzine Alpha in treatment of mild to moderate Alzheimer disease, a placebo-controlled, double-blind, randomized trial]. *Zhonghua Yi Xue Za Zhi*, **2002**, *82*(14), 941-944.

[50] Adair, J.C.; Knoefel, J.E.; Morgan, N. Controlled trial of N-acetylcysteine for patients with probable Alzheimer's disease. *Neurology*, **2001**, *57*(8), 1515-1517.

[51] Frolich, L.; Atri, A.; Ballard, C.; Tariot, P.N.; Molinuevo, J.L.; Boneva, N.; Geist, M.A.; Raket, L.L.; Cummings, J.L. Open-Label, Multicenter, Phase III Extension Study of Idalopirdine as Adjunctive to Donepezil for the Treatment of Mild-Moderate Alzheimer's Disease. *J Alzheimers Dis*, **2019**, *67*(1), 303-313.

[52] Atri, A.; Frolich, L.; Ballard, C.; Tariot, P.N.; Molinuevo, J.L.; Boneva, N.; Windfeld, K.; Raket, L.L.; Cummings, J.L. Effect of Idalopirdine as Adjunct to Cholinesterase Inhibitors on Change in Cognition in Patients With Alzheimer Disease: Three Randomized Clinical Trials. *JAMA*, **2018**, *319*(2), 130-142.

[53] Blonieceki, V.; Aarsland, D.; Blennow, K.; Cummings, J.; Falahati, F.; Winblad, B.; Freund-Levi, Y. Effects of Risperidone and Galantamine Treatment on Alzheimer's Disease Biomarker Levels in Cerebrospinal Fluid. *J Alzheimers Dis*, **2017**, *57*(2), 387-393.

[54] Frolich, L.; Ashwood, T.; Nilsson, J.; Eckerwall, G.; Sirocco, I. Effects of AZD3480 on cognition in patients with mild-to-moderate Alzheimer's disease: a phase IIb dose-finding study. *J Alzheimers Dis*, **2011**, *24*(2), 363-374.

[55] Thal, L.J.; Grundman, M.; Berg, J.; Erntstrom, K.; Margolin, R.; Pfeiffer, E.; Weiner, M.F.; Zamrini, E.; Thomas, R.G. Idebenone treatment fails to slow cognitive decline in Alzheimer's disease. *Neurology*, **2003**, *61*(11), 1498-1502.

[56] Simons, M.; Schwarzler, F.; Lutjohann, D.; von Bergmann, K.; Beyreuther, K.; Dichgans, J.; Wormstall, H.; Hartmann, T.; Schulz, J.B. Treatment with simvastatin in normocholesterolemic patients with Alzheimer's disease: A 26-week randomized, placebo-controlled, double-blind trial. *Ann Neurol*, **2002**, *52*(3), 346-350.

[57] Wang, P.N.; Liao, S.Q.; Liu, R.S.; Liu, C.Y.; Chao, H.T.; Lu, S.R.; Yu, H.Y.; Wang, S.J.; Liu, H.C. Effects of estrogen on cognition, mood, and cerebral blood flow in AD: a controlled study. *Neurology*, **2000**, *54*(11), 2061-2066.

- [58] Mulnard, R.A.; Cotman, C.W.; Kawas, C.; van Dyck, C.H.; Sano, M.; Doody, R.; Koss, E.; Pfeiffer, E.; Jin, S.; Gamst, A.; Grundman, M.; Thomas, R.; Thal, L.J. Estrogen replacement therapy for treatment of mild to moderate Alzheimer disease: a randomized controlled trial. Alzheimer's Disease Cooperative Study. *JAMA*, **2000**, *283*(8), 1007-1015.
- [59] Jaiswal, S.J.; McCarthy, T.J.; Wineinger, N.E.; Kang, D.Y.; Song, J.; Garcia, S.; van Niekerk, C.J.; Lu, C.Y.; Loeks, M.; Owens, R.L. Melatonin and Sleep in Preventing Hospitalized Delirium: A Randomized Clinical Trial. *Am J Med*, **2018**, *131*(9), 1110-1117 e1114.
- [60] Gehrman, P.R.; Connor, D.J.; Martin, J.L.; Shochat, T.; Corey-Bloom, J.; Ancoli-Israel, S. Melatonin fails to improve sleep or agitation in double-blind randomized placebo-controlled trial of institutionalized patients with Alzheimer disease. *Am J Geriatr Psychiatry*, **2009**, *17*(2), 166-169.
- [61] Dowling, G.A.; Burr, R.L.; Van Someren, E.J.; Hubbard, E.M.; Luxenberg, J.S.; Mastick, J.; Cooper, B.A. Melatonin and bright-light treatment for rest-activity disruption in institutionalized patients with Alzheimer's disease. *J Am Geriatr Soc*, **2008**, *56*(2), 239-246.
- [62] Serfaty, M.; Kennell-Webb, S.; Warner, J.; Blizard, R.; Raven, P. Double blind randomised placebo controlled trial of low dose melatonin for sleep disorders in dementia. *Int J Geriatr Psychiatry*, **2002**, *17*(12), 1120-1127.
- [63] Haffmans, P.M.; Sival, R.C.; Lucius, S.A.; Cats, Q.; van Gelder, L. Bright light therapy and melatonin in motor restless behaviour in dementia: a placebo-controlled study. *Int J Geriatr Psychiatry*, **2001**, *16*(1), 106-110.
- [64] Xu, L.; Yu, H.; Sun, H.; Hu, B.; Geng, Y. Dietary Melatonin Therapy Alleviates the Lamina Cribrosa Damages in Patients with Mild Cognitive Impairments: A Double-Blinded, Randomized Controlled Study. *Med Sci Monit*, **2020**, *26*, e923232.
- [65] Watanabe, M.; Nakamura, Y.; Yoshiyama, Y.; Kagimura, T.; Kawaguchi, H.; Matsuzawa, H.; Tachibana, Y.; Nishimura, K.; Kubota, N.; Kobayashi, M.; Saito, T.; Tamura, K.; Sato, T.; Takahashi, M.; Japanese Society of Scaling Keys of Evaluation Techniques for, C.N.S.D.H.s.g.; Homma, A. Analyses of natural courses of Japanese patients with Alzheimer's disease using placebo data from placebo-controlled, randomized clinical trials: Japanese Study on the Estimation of Clinical course of Alzheimer's disease. *Alzheimers Dement (N Y)*, **2019**, *5*, 398-408.
- [66] Koola, M.M.; Nikiforuk, A.; Pillai, A.; Parsaik, A.K. Galantamine-memantine combination superior to donepezil-memantine combination in Alzheimer's disease: critical dissection with an emphasis on kynurenic acid and mismatch negativity. *J Geriatr Care Res*, **2018**, *5*(2), 57-67.
- [67] Urrestarazu, E.; Iriarte, J. Clinical management of sleep disturbances in Alzheimer's disease: current and emerging strategies. *Nat Sci Sleep*,

**2016**, 8, 21-33.

[68] Cardinali, D.P.; Vigo, D.E.; Olivar, N.; Vidal, M.F.; Brusco, L.I. Melatonin Therapy in Patients with Alzheimer's Disease. *Antioxidants (Basel)*, **2014**, 3(2), 245-277.

[69] Cardinali, D.P.; Furio, A.M.; Brusco, L.I. Clinical aspects of melatonin intervention in Alzheimer's disease progression. *Curr Neuropharmacol*, **2010**, 8(3), 218-227.

[70] Glass, O.M.; Hermida, A.P.; Hershenberg, R.; Schwartz, A.C. Considerations and Current Trends in the Management of the Geriatric Patient on a Consultation-Liaison Service. *Curr Psychiatry Rep*, **2020**, 22(5), 21.

[71] Cummings, J.; Froelich, L.; Black, S.E.; Bakchine, S.; Bellelli, G.; Molinuevo, J.L.; Kressig, R.W.; Downs, P.; Caputo, A.; Strohmaier, C. Randomized, double-blind, parallel-group, 48-week study for efficacy and safety of a higher-dose rivastigmine patch (15 vs. 10 cm<sup>2</sup>) in Alzheimer's disease. *Dement Geriatr Cogn Disord*, **2012**, 33(5), 341-353.

[72] Ma, Y.; Ji, J.; Li, G.; Yang, S.; Pan, S. Effects of donepezil on cognitive functions and the expression level of beta-amyloid in peripheral blood of patients with Alzheimer's disease. *Exp Ther Med*, **2018**, 15(2), 1875-1878.

**eTable 5: Characteristics of the included studies**

| Study name                  | Diagnostic criteria        | Baseline dementia severity                                                     | Comparison                                                  | Subjects     | Mean age             | Female proportion | Treatment duration | Duration subgroup | Country            |
|-----------------------------|----------------------------|--------------------------------------------------------------------------------|-------------------------------------------------------------|--------------|----------------------|-------------------|--------------------|-------------------|--------------------|
| Vila-Castelar, C. (2019)[1] | NINCDS-ADRDA               | mild to moderate probable AD, MMSE around 15-26                                | Donepezil medium dose<br>Placebo                            | 12<br>11     | 79.3±7.4<br>81.7±3.8 | 66.7<br>63.6      | 6 weeks            | Short             | USA                |
| Jia, (2017)[2]              | J. DSM-IV and NINCDS-ADRDA | moderate to severe probable AD, MMSE around 1-12                               | Donepezil high dose<br>Placebo                              | 157<br>156   | 71.6±8.6<br>70.0±9.6 | 67.5<br>62.2      | 24 weeks           | Medium            | China              |
| Homma, A. (2016)[3]         | DSM-IV                     | moderate to severe probable AD, MMSE around 1-12                               | Donepezil high dose<br>Donepezil extreme high dose          | 161<br>179   | 76.2±8.8<br>75.7±8.8 | 69.6<br>69.3      | 24 weeks           | Medium            | Japan              |
| Zhang, Z.X. (2016)[4]       | NINCDS-ADRDA               | moderate probable AD, MMSE around 10-20                                        | Rivastigmine patch high dose<br>Rivastigmine high dose      | 248<br>253   | 70.4±8.0<br>69.8±8.2 | 56.5<br>54.9      | 24 weeks           | Medium            | China              |
| Shao, Z.Q. (2015)[5]        | DSM-IV                     | mild to moderate probable AD, MMSE around 10-24                                | Memantine high dose                                         | 22           | 73.0±7.1             | 50.0              | 24 weeks           | Medium            | China              |
|                             |                            |                                                                                | Memantine high dose + donepezil high dose                   | 22           | 73.4±6.0             | 54.5              |                    |                   |                    |
|                             |                            |                                                                                | Memantine high dose + rivastigmine medium dose              | 22           | 73.1±7.1             | 50.0              |                    |                   |                    |
|                             |                            |                                                                                | Memantine high dose + Galantamine low dose                  | 22           | 73.4±7.8             | 50.0              |                    |                   |                    |
|                             |                            |                                                                                |                                                             |              |                      |                   |                    |                   |                    |
| Zhang, N. (2015)[6]         | NINCDS-ADRDA               | mild to moderate probable AD, MMSE around 10-24                                | Memantine high dose<br>Donepezil high dose                  | 80<br>87     | 69.8±8.1<br>70.1±8.0 | 61.3<br>59.8      | 24 weeks           | Medium            | China              |
| Dysken, M.W. (2014)[7]      | NINCDS-ADRDA               | mild to moderate probable AD, MMSE around 12-26                                | Memantine high dose<br>Placebo                              | 155<br>152   | 78.8±7.2<br>79.4±7.0 | 3.9<br>2.0        | 208 weeks          | Extreme long      | USA                |
| Hager, K. (2014)[8]         | NINCDS-ADRDA               | mild to moderate probable AD, MMSE around 10-26                                | Galantamine medium dose<br>Placebo                          | 1024<br>1021 | 73.0±8.9<br>73.0±8.7 | 65.5<br>64.1      | 104 weeks          | Extreme long      | Multiple countries |
| Wade, A.G. (2014)[9]        | NA                         | mild to moderate AD and Mini-Mental State Examination (MMSE) score at least 15 | Melatonin low dose<br>Placebo                               | 39<br>34     | 73.5±8.6<br>77.3±6.6 | 41.0<br>58.8      | 24 weeks           | Medium            | Multiple countries |
| Farlow, M.R. (2013)[10]     | NINCDS-ADRDA               | moderate to severe probable AD, MMSE around 3 to 12                            | Rivastigmine patch high dose<br>Rivastigmine patch low dose | 356<br>360   | 77.6±8.7<br>76.5±9.4 | 63.8<br>65.0      | 24 weeks           | Medium            | USA                |
| Grossberg, G.T. (2013)[11]  | DSM-IV and NINCDS-ADRDA    | moderate to severe probable AD, MMSE around 3-14                               | Memantine extreme high dose<br>Placebo                      | 341<br>335   | 76.2±8.4<br>76.8±7.8 | 71.6<br>72.5      | 24 weeks           | Medium            | Multiple countries |

|                               |                         |                                                      |                                                    |     |           |      |          |        |                    |
|-------------------------------|-------------------------|------------------------------------------------------|----------------------------------------------------|-----|-----------|------|----------|--------|--------------------|
| Herrmann, N. (2013)[12]       | NINCDS-ADRDA            | moderate to severe probable AD, MMSE around 8-18     | Memantine high dose<br>Placebo                     | 182 | 74.7±7.9  | 57.7 | 24 weeks | Medium | Canada             |
|                               |                         |                                                      |                                                    | 187 | 75.1±6.9  | 58.8 |          |        |                    |
| Wang, T. (2013)[13]           | DSM-IV and NINCDS-ADRDA | moderate to severe probable AD, MMSE around 4-20     | Memantine high dose<br>Placebo                     | 11  | 65.7±12.5 | 63.6 | 24 weeks | Medium | China              |
|                               |                         |                                                      |                                                    | 11  | 64.7±11.5 | 63.6 |          |        |                    |
| Fox, C. (2012)[14]            | NINCDS-ADRDA            | moderate to severe probable AD, MMSE around 1-19     | Memantine high dose<br>Placebo                     | 72  | 84.9±6.7  | 72.2 | 12 weeks | Short  | UK                 |
|                               |                         |                                                      |                                                    | 77  | 84.4±6.6  | 75.3 |          |        |                    |
| Likitjaroen, Y. (2012)[15]    | NINCDS-ADRDA            | mild to moderate probable AD, MMSE around 22.5 ± 2.7 | Galantamine medium dose<br>Placebo                 | 14  | 73.5±7.2  | 57.1 | 24 weeks | Medium | Germany            |
|                               |                         |                                                      |                                                    | 11  | 76.4±7.9  | 63.6 |          |        |                    |
| Maher-Edwards, G. (2011)[16]  | NINCDS-ADRDA            | mild to moderate probable AD, MMSE around 12-24      | Donepezil high dose<br>Placebo                     | 67  | 71.1±8.4  | 63.0 | 24 weeks | Medium | Multiple countries |
|                               |                         |                                                      |                                                    | 61  | 71.6±6.7  | 70.0 |          |        |                    |
| Nakamura, Y. (2011)[17]       | NINCDS-ADRDA            | moderate probable AD, MMSE around 10-20              | Rivastigmine patch low dose                        | 282 | 74.3±7.5  | 68.8 | 24 weeks | Medium | Japan              |
|                               |                         |                                                      | Rivastigmine patch high dose                       | 287 | 75.1±6.9  | 67.9 |          |        |                    |
|                               |                         |                                                      | Placebo                                            | 286 | 74.5±7.4  | 68.2 |          |        |                    |
| Farlow, M.R. (2010)[18]       | DSM-IV and NINCDS-ADRDA | moderate to severe probable AD, MMSE around 0-20     | Donepezil extreme high dose<br>Donepezil high dose | 963 | 73.9±8.5  | 63.0 | 24 weeks | Medium | Multiple countries |
|                               |                         |                                                      |                                                    | 471 | 73.8±8.6  | 62.4 |          |        |                    |
| Burns, A. (2009)[19]          | DSM-IV and NINCDS-ADRDA | moderate to severe probable AD, MMSE around 5-12     | Galantamine medium dose<br>Placebo                 | 207 | 83.7±5.7  | 80.7 | 24 weeks | Medium | Multiple countries |
|                               |                         |                                                      |                                                    | 200 | 83.5±5.8  | 81.0 |          |        |                    |
| Gao, Q.W. (2009)[20]          | NINCDS-ADRDA            | mild probable AD, MMSE around 17-24                  | Melatonin low dose<br>Placebo                      | 15  | 77.1±3.2  | 0.0  | 24 weeks | Medium | China              |
|                               |                         |                                                      |                                                    | 16  | 76.9±2.8  | 0.0  |          |        |                    |
| Bakchine, S. (2008)[21]       | DSM-IV and NINCDS-ADRDA | mild to moderate probable AD, MMSE around 11-23      | Memantine high dose<br>Placebo                     | 318 | 74.0±7.4  | 64.8 | 24 weeks | Medium | Multiple countries |
|                               |                         |                                                      |                                                    | 152 | 73.3±6.9  | 59.9 |          |        |                    |
| Homma, A. (2008)[22]          | DSM-IV                  | moderate to severe probable AD, MMSE around 1-12     | Donepezil medium dose                              | 96  | 78.0±8.9  | 79.2 | 24 weeks | Medium | Japan              |
|                               |                         |                                                      | Donepezil high dose                                | 92  | 76.9±7.9  | 79.3 |          |        |                    |
|                               |                         |                                                      | Placebo                                            | 102 | 79.7±7.5  | 82.4 |          |        |                    |
| Porsteinsson, A.P. (2008)[23] | NINCDS-ADRDA            | mild to moderate probable AD, MMSE around 10-22      | Memantine high dose<br>Placebo                     | 217 | 74.9±7.64 | 53.9 | 24 weeks | Medium | USA                |
|                               |                         |                                                      |                                                    | 216 | 76.0±8.43 | 50.5 |          |        |                    |
| Black, S.E. (2007)[24]        | DSM-IV and NINCDS-ADRDA | moderate to severe probable AD, MMSE around 1-12     | Donepezil high dose<br>Placebo                     | 176 | 78.0±8.0  | 72.7 | 24 weeks | Medium | Multiple countries |
|                               |                         |                                                      |                                                    | 167 | 78.0±8.2  | 67.7 |          |        |                    |
| Howard, R.J. (2007)[25]       | NINCDS-ADRDA            | moderate to severe probable AD                       | Donepezil high dose<br>Placebo                     | 128 | 84.9±7.3  | 82.0 | 12 weeks | Short  | UK                 |
|                               |                         |                                                      |                                                    | 131 | 84.4±8.2  | 87.0 |          |        |                    |

|                           |                         |                                                                         |                                                                                                           |                          |                                              |                              |          |        |                    |
|---------------------------|-------------------------|-------------------------------------------------------------------------|-----------------------------------------------------------------------------------------------------------|--------------------------|----------------------------------------------|------------------------------|----------|--------|--------------------|
| van Dyck, C.H. (2007)[26] | NINCDS-ADRDA            | moderate to severe probable AD, MMSE around 5 to 14                     | Memantine high dose<br>Placebo                                                                            | 178<br>172               | 78.1±8.2<br>78.3±7.6                         | 72.5<br>70.3                 | 24 weeks | Medium | USA                |
| Winblad, B. (2007)[27]    | NINCDS-ADRDA            | moderate probable AD, MMSE around 10-20                                 | Rivastigmine patch high dose<br>Rivastigmine patch extreme high dose<br>Rivastigmine high dose<br>Placebo | 291<br>303<br>294<br>302 | 73.6±7.9<br>74.2±7.7<br>72.8±8.2<br>73.9±7.3 | 68.0<br>66.0<br>65.6<br>66.6 | 24 weeks | Medium | Multiple countries |
| Peskind, E.R. (2006)[28]  | NINCDS-ADRDA            | mild to moderate probable AD, MMSE around 10-22                         | Memantine high dose<br>Placebo                                                                            | 201<br>202               | 78.0±7.3<br>77.0±8.2                         | 60.2<br>57.4                 | 24 weeks | Medium | USA                |
| Rockwood, K. (2006)[29]   | NINCDS-ADRDA            | mild to moderate probable AD, MMSE around 10-25                         | Galantamine medium dose<br>Placebo                                                                        | 64<br>66                 | 77.0<br>78.0                                 | 64.1<br>62.1                 | 16 weeks | Short  | Canada             |
| Winblad, B. (2006)[30]    | DSM-IV and NINCDS-ADRDA | severe probable AD, MMSE around 1-10                                    | Donepezil high dose<br>Placebo                                                                            | 128<br>120               | 84.5±6.0<br>85.3±5.9                         | 78.9<br>74.2                 | 24 weeks | Medium | Sweden             |
| Brody, H. (2005)[31]      | NINCDS-ADRDA            | mild to moderate probable AD, MMSE around 10-24                         | Galantamine medium dose (data of general form)<br>Placebo                                                 | 326<br>320               | 76.5±7.8<br>76.3±8.0                         | 63.8<br>64.1                 | 26 weeks | Medium | Multiple countries |
| Karaman, Y. (2005)[32]    | NINCDS-ADRDA            | moderate probable AD, MMSE around 14 over a period of at least 6 months | Rivastigmine high dose<br>Placebo                                                                         | 24<br>20                 | 74.1±4.3<br>73.4±4.0                         | 54.2<br>55.0                 | 52 weeks | Long   | Turkey             |
| Seltzer, B. (2004)[33]    | DSM-IV and NINCDS-ADRDA | mild probable AD, MMSE around 21-26                                     | Donepezil high dose<br>Placebo                                                                            | 96<br>57                 | 73.3±9.6<br>75.1±8.8                         | 50.0<br>59.6                 | 24 weeks | Medium | USA                |
| Tariot, P.N. (2004)[34]   | NINCDS-ADRDA            | moderate to severe probable AD, MMSE around 5-14                        | Memantine high dose + donepezil high dose<br>Donepezil high dose + placebo                                | 202<br>201               | 75.5±8.5<br>75.5±8.7                         | 63.4<br>66.7                 | 24 weeks | Medium | USA                |
| Asayama, K. (2003)[35]    | DSM-IV and NINCDS-ADRDA | not specified                                                           | Melatonin low dose<br>Placebo                                                                             | 11<br>9                  | 78.9±7.3<br>79.4±5.3                         | 90.9<br>77.8                 | 4 weeks  | Short  | Japan              |
| Krishnan, K.R. (2003)[36] | DSM-IV and NINCDS-ADRDA | mild to moderate probable AD, MMSE around 10-26                         | Donepezil high dose<br>Placebo                                                                            | 34<br>33                 | 74.4±7.0<br>72.4±10.1                        | 73.5<br>69.7                 | 24 weeks | Medium | USA                |
| Reisberg, B. (2003)[37]   | DSM-IV and NINCDS-ADRDA | moderate to severe probable AD, MMSE around 3-14                        | Memantine high dose<br>Placebo                                                                            | 97<br>84                 | 75.5±8.2<br>75.8±7.3                         | 72.2<br>65.5                 | 28 weeks | Medium | USA                |

|                             |                            |                                                                                    |                         |     |           |      |          |        |                    |
|-----------------------------|----------------------------|------------------------------------------------------------------------------------|-------------------------|-----|-----------|------|----------|--------|--------------------|
| Singer, C.<br>(2003)[38]    | NINCDS-ADRDA               | probable AD                                                                        | Melatonin low dose      | 54  | 78.4±8.2  | 56.1 | 8 weeks  | Short  | Multiple countries |
|                             |                            |                                                                                    | Melatonin high dose     | 51  | 76.5±10.1 |      |          |        |                    |
|                             |                            |                                                                                    | Placebo                 | 52  | 77.0±8.5  |      |          |        |                    |
| Tune, L.<br>(2003)[39]      | NINCDS-ADRDA               | mild to moderate probable AD, MMSE around 10-26                                    | Donepezil high dose     | 14  | 73.7      | 78.6 | 24 weeks | Medium | USA                |
|                             |                            |                                                                                    | Placebo                 | 14  | 72.2      | 71.4 |          |        |                    |
| Feldman, H.<br>(2001)[40]   | NINCDS-ADRDA               | moderate to severe probable AD, screening standardized MMSE around 5 to 17         | Donepezil high dose     | 144 | 73.3      | 61.1 | 24 weeks | Medium | Multiple countries |
|                             |                            |                                                                                    | Placebo                 | 146 | 74.0      | 61.0 |          |        |                    |
| Tariot, P.N.<br>(2001)[41]  | NINCDS-ADRDA               | mild to severe probable AD, MMSE around 5-26                                       | Donepezil high dose     | 103 | 85.4      | 83.0 | 24 weeks | Medium | USA                |
|                             |                            |                                                                                    | Placebo                 | 105 | 85.9      | 82.0 |          |        |                    |
| Wilkinson, D.<br>(2001)[42] | DSM-III-R and NINCDS-ADRDA | mild to moderate probable AD, MMSE around 13-24                                    | Galantamine medium dose | 144 | 72.8±8.4  | 57.2 | 12 weeks | Short  | UK                 |
|                             |                            |                                                                                    | Galantamine high dose   | 54  | 75.4±7.3  | 57.0 |          |        |                    |
|                             |                            |                                                                                    | Placebo                 | 87  | 74.2±8.4  | 59.0 |          |        |                    |
| Homma, A.<br>(2000)[43]     | DSM-IV                     | mild to moderate probable AD, MMSE around 10-26                                    | Donepezil medium dose   | 116 | 70.1±7.6  | 68.1 | 24 weeks | Medium | Japan              |
|                             |                            |                                                                                    | Placebo                 | 112 | 69.4±8.8  | 66.1 |          |        |                    |
| Raskind, M.A.<br>(2000)[44] | NINCDS-ADRDA               | mild to moderate probable AD, MMSE around 11-24 over a period of at least 6 months | Galantamine medium dose | 212 | 75.9±7.3  | 65.6 | 24 weeks | Medium | USA                |
|                             |                            |                                                                                    | Galantamine high dose   | 211 | 75.0±8.7  | 58.8 |          |        |                    |
|                             |                            |                                                                                    | Placebo                 | 213 | 75.3±8.8  | 61.5 |          |        |                    |
| Tariot, P.N.<br>(2000)[45]  | NINCDS-ADRDA               | mild to moderate probable AD, MMSE around 10-22 over a period of at least 6 months | Galantamine low dose    | 419 | 76.2±8.0  | 63.0 | 21 weeks | Short  | USA                |
|                             |                            |                                                                                    | Galantamine medium dose | 273 | 77.7±6.6  | 67.0 |          |        |                    |
|                             |                            |                                                                                    | Placebo                 | 286 | 77.1±8.5  | 62.2 |          |        |                    |
| Wilcock, G.K.<br>(2000)[46] | NINCDS-ADRDA               | mild to moderate probable AD, MMSE around 11-24                                    | Galantamine medium dose | 220 | 71.9±8.3  | 63.2 | 24 weeks | Medium | Multiple countries |
|                             |                            |                                                                                    | Galantamine high dose   | 218 | 72.1±8.6  | 63.3 |          |        |                    |
|                             |                            |                                                                                    | Placebo                 | 215 | 72.7±7.6  | 61.4 |          |        |                    |
| Burns, A.<br>(1999)[47]     | DSM-III-R and NINCDS-ADRDA | mild to moderate probable AD, MMSE around 10-26                                    | Donepezil medium dose   | 271 | 72.0±8.2  | 60.5 | 30 weeks | Medium | Multiple countries |
|                             |                            |                                                                                    | Donepezil high dose     | 273 | 72.0±8.3  | 56.8 |          |        |                    |
|                             |                            |                                                                                    | Placebo                 | 274 | 71.0±8.3  | 55.1 |          |        |                    |
| Forette, F.<br>(1999)[48]   | NINCDS-ADRDA               | mild to moderate probable AD, MMSE around 12-26                                    | Rivastigmine high dose  | 51  | 70.7±8.4  | NA   | 18 weeks | Short  | Multiple countries |
|                             |                            |                                                                                    | Placebo                 | 19  | 72.5±4.8  |      |          |        |                    |
| Rosler, M.<br>(1999)[49]    | DSM-IV and NINCDS-ADRDA    | mild to moderate probable AD, MMSE around 10-26                                    | Rivastigmine low dose   | 209 | 72        | 59   | 26 weeks | Medium | Multiple countries |
|                             |                            |                                                                                    | Rivastigmine high dose  | 164 |           |      |          |        |                    |
|                             |                            |                                                                                    | Placebo                 | 208 |           |      |          |        |                    |



|                                                                                                    |                       |     |          |      |          |        |     |
|----------------------------------------------------------------------------------------------------|-----------------------|-----|----------|------|----------|--------|-----|
| Rogers, S.L. DSM-III-R and mild to moderate probable AD, (1998)[50] NINCDS-ADRDA MMSE around 10-26 | Donepezil high dose   | 157 | 74.6±7.5 | 61.8 |          |        |     |
|                                                                                                    | Donepezil medium dose | 154 | 72.9±7.4 | 63.0 | 24 weeks | Medium | USA |
|                                                                                                    | Placebo               | 162 | 72.6±7.6 | 61.1 |          |        |     |

Abbreviation: AD: Alzheimer's dementia; DSM-5: Diagnostic and Statistical Manual of Mental Disorders, 5<sup>th</sup> edition; DSM-III: Diagnostic and Statistical Manual of Mental Disorders, 3<sup>rd</sup> edition; DSM-IV: Diagnostic and Statistical Manual of Mental Disorders, 4<sup>th</sup> edition; MMSE: Mini-Mental State Examination; NA: not available; NINCDS-ADRDA: National Institute of Neurological and Communicative Disorders and Stroke and the Alzheimer's Disease and Related Disorders Association

#### References:

- [1] Vila-Castelar, C.; Ly, J.J.; Kaplan, L.; Van Dyk, K.; Berger, J.T.; Macina, L.O.; Stewart, J.L.; Foldi, N.S. Attention Measures of Accuracy, Variability, and Fatigue Detect Early Response to Donepezil in Alzheimer's Disease: A Randomized, Double-blind, Placebo-Controlled Pilot Trial. *Arch Clin Neuropsychol*, **2019**, *34*(3), 277-289.
- [2] Jia, J.; Wei, C.; Jia, L.; Tang, Y.; Liang, J.; Zhou, A.; Li, F.; Shi, L.; Doody, R.S. Efficacy and Safety of Donepezil in Chinese Patients with Severe Alzheimer's Disease: A Randomized Controlled Trial. *J Alzheimers Dis*, **2017**, *56*(4), 1495-1504.
- [3] Homma, A.; Atarashi, H.; Kubota, N.; Nakai, K.; Takase, T. Efficacy and Safety of Sustained Release Donepezil High Dose versus Immediate Release Donepezil Standard Dose in Japanese Patients with Severe Alzheimer's Disease: A Randomized, Double-Blind Trial. *J Alzheimers Dis*, **2016**, *52*(1), 345-357.
- [4] Zhang, Z.X.; Hong, Z.; Wang, Y.P.; He, L.; Wang, N.; Zhao, Z.X.; Zhao, G.; Shang, L.; Weisskopf, M.; Callegari, F.; Strohmaier, C. Rivastigmine Patch in Chinese Patients with Probable Alzheimer's disease: A 24-week, Randomized, Double-Blind Parallel-Group Study Comparing Rivastigmine Patch (9.5 mg/24 h) with Capsule (6 mg Twice Daily). *CNS Neurosci Ther*, **2016**, *22*(6), 488-496.
- [5] Shao, Z.Q. Comparison of the efficacy of four cholinesterase inhibitors in combination with memantine for the treatment of Alzheimer's disease. *Int J Clin Exp Med*, **2015**, *8*(2), 2944-2948.
- [6] Zhang, N.; Wei, C.; Du, H.; Shi, F.D.; Cheng, Y. The Effect of Memantine on Cognitive Function and Behavioral and Psychological Symptoms

in Mild-to-Moderate Alzheimer's Disease Patients. *Dement Geriatr Cogn Disord*, **2015**, *40*(1-2), 85-93.

[7] Dysken, M.W.; Sano, M.; Asthana, S.; Vertrees, J.E.; Pallaki, M.; Llorente, M.; Love, S.; Schellenberg, G.D.; McCarten, J.R.; Malphurs, J.; Prieto, S.; Chen, P.; Loreck, D.J.; Trapp, G.; Bakshi, R.S.; Mintzer, J.E.; Heidebrink, J.L.; Vidal-Cardona, A.; Arroyo, L.M.; Cruz, A.R.; Zachariah, S.; Kowall, N.W.; Chopra, M.P.; Craft, S.; Thielke, S.; Turvey, C.L.; Woodman, C.; Monnell, K.A.; Gordon, K.; Tomaska, J.; Segal, Y.; Peduzzi, P.N.; Guarino, P.D. Effect of vitamin E and memantine on functional decline in Alzheimer disease: the TEAM-AD VA cooperative randomized trial. *JAMA*, **2014**, *311*(1), 33-44.

[8] Hager, K.; Baseman, A.S.; Nye, J.S.; Brashear, H.R.; Han, J.; Sano, M.; Davis, B.; Richards, H.M. Effects of galantamine in a 2-year, randomized, placebo-controlled study in Alzheimer's disease. *Neuropsychiatr Dis Treat*, **2014**, *10*, 391-401.

[9] Wade, A.G.; Farmer, M.; Harari, G.; Fund, N.; Laudon, M.; Nir, T.; Frydman-Marom, A.; Zisapel, N. Add-on prolonged-release melatonin for cognitive function and sleep in mild to moderate Alzheimer's disease: a 6-month, randomized, placebo-controlled, multicenter trial. *Clin Interv Aging*, **2014**, *9*, 947-961.

[10] Farlow, M.R.; Grossberg, G.T.; Sadowsky, C.H.; Meng, X.; Somogyi, M. A 24-week, randomized, controlled trial of rivastigmine patch 13.3 mg/24 h versus 4.6 mg/24 h in severe Alzheimer's dementia. *CNS Neurosci Ther*, **2013**, *19*(10), 745-752.

[11] Grossberg, G.T.; Manes, F.; Allegri, R.F.; Gutierrez-Robledo, L.M.; Gloger, S.; Xie, L.; Jia, X.D.; Pejovic, V.; Miller, M.L.; Perhach, J.L.; Graham, S.M. The safety, tolerability, and efficacy of once-daily memantine (28 mg): a multinational, randomized, double-blind, placebo-controlled trial in patients with moderate-to-severe Alzheimer's disease taking cholinesterase inhibitors. *CNS Drugs*, **2013**, *27*(6), 469-478.

[12] Herrmann, N.; Gauthier, S.; Boneva, N.; Lemming, O.M.; Investigators. A randomized, double-blind, placebo-controlled trial of memantine in a behaviorally enriched sample of patients with moderate-to-severe Alzheimer's disease. *Int Psychogeriatr*, **2013**, *25*(6), 919-927.

[13] Wang, T.; Huang, Q.; Reiman, E.M.; Chen, K.; Li, X.; Li, G.; Lin, Z.; Li, C.; Xiao, S. Effects of memantine on clinical ratings, fluorodeoxyglucose positron emission tomography measurements, and cerebrospinal fluid assays in patients with moderate to severe Alzheimer dementia: a 24-week, randomized, clinical trial. *J Clin Psychopharmacol*, **2013**, *33*(5), 636-642.

[14] Fox, C.; Crugel, M.; Maidment, I.; Auestad, B.H.; Coulton, S.; Treloar, A.; Ballard, C.; Boustani, M.; Katona, C.; Livingston, G. Efficacy of memantine for agitation in Alzheimer's dementia: a randomised double-blind placebo controlled trial. *PLoS One*, **2012**, *7*(5), e35185.

- [15] Likitjaroen, Y.; Meindl, T.; Friese, U.; Wagner, M.; Buerger, K.; Hampel, H.; Teipel, S.J. Longitudinal changes of fractional anisotropy in Alzheimer's disease patients treated with galantamine: a 12-month randomized, placebo-controlled, double-blinded study. *Eur Arch Psychiatry Clin Neurosci*, **2012**, *262*(4), 341-350.
- [16] Maher-Edwards, G.; Dixon, R.; Hunter, J.; Gold, M.; Hopton, G.; Jacobs, G.; Hunter, J.; Williams, P. SB-742457 and donepezil in Alzheimer disease: a randomized, placebo-controlled study. *Int J Geriatr Psychiatry*, **2011**, *26*(5), 536-544.
- [17] Nakamura, Y.; Imai, Y.; Shigeta, M.; Graf, A.; Shirahase, T.; Kim, H.; Fujii, A.; Mori, J.; Homma, A. A 24-week, randomized, double-blind, placebo-controlled study to evaluate the efficacy, safety and tolerability of the rivastigmine patch in Japanese patients with Alzheimer's disease. *Dement Geriatr Cogn Dis Extra*, **2011**, *1*(1), 163-179.
- [18] Farlow, M.R.; Salloway, S.; Tariot, P.N.; Yardley, J.; Moline, M.L.; Wang, Q.; Brand-Schieber, E.; Zou, H.; Hsu, T.; Satlin, A. Effectiveness and tolerability of high-dose (23 mg/d) versus standard-dose (10 mg/d) donepezil in moderate to severe Alzheimer's disease: A 24-week, randomized, double-blind study. *Clin Ther*, **2010**, *32*(7), 1234-1251.
- [19] Burns, A.; Bernabei, R.; Bullock, R.; Cruz Jentoft, A.J.; Frolich, L.; Hock, C.; Raivio, M.; Triau, E.; Vandewoude, M.; Wimo, A.; Came, E.; Van Baelen, B.; Hammond, G.L.; van Oene, J.C.; Schwalen, S. Safety and efficacy of galantamine (Reminyl) in severe Alzheimer's disease (the SERAD study): a randomised, placebo-controlled, double-blind trial. *Lancet Neurol*, **2009**, *8*(1), 39-47.
- [20] Gao, Q.W.; Lio, Y.; Luo, G.Q.; Xiang, W.; Peng, K.R. Effect of melatonin on mild Alzheimer's disease in elderly male patients. *Parct Geriatr*, **2009**, *23*(1), 56-58.
- [21] Bakchine, S.; Loft, H. Memantine treatment in patients with mild to moderate Alzheimer's disease: results of a randomised, double-blind, placebo-controlled 6-month study. *J Alzheimers Dis*, **2008**, *13*(1), 97-107.
- [22] Homma, A.; Imai, Y.; Tago, H.; Asada, T.; Shigeta, M.; Iwamoto, T.; Takita, M.; Arimoto, I.; Koma, H.; Ohbayashi, T. Donepezil treatment of patients with severe Alzheimer's disease in a Japanese population: results from a 24-week, double-blind, placebo-controlled, randomized trial. *Dement Geriatr Cogn Disord*, **2008**, *25*(5), 399-407.
- [23] Porsteinsson, A.P.; Grossberg, G.T.; Mintzer, J.; Olin, J.T.; Memantine, M.E.M.M.D.S.G. Memantine treatment in patients with mild to moderate Alzheimer's disease already receiving a cholinesterase inhibitor: a randomized, double-blind, placebo-controlled trial. *Curr Alzheimer*

Res, **2008**, 5(1), 83-89.

[24] Black, S.E.; Doody, R.; Li, H.; McRae, T.; Jambor, K.M.; Xu, Y.; Sun, Y.; Perdomo, C.A.; Richardson, S. Donepezil preserves cognition and global function in patients with severe Alzheimer disease. *Neurology*, **2007**, 69(5), 459-469.

[25] Howard, R.J.; Juszcak, E.; Ballard, C.G.; Bentham, P.; Brown, R.G.; Bullock, R.; Burns, A.S.; Holmes, C.; Jacoby, R.; Johnson, T.; Knapp, M.; Lindsay, J.; O'Brien, J.T.; Wilcock, G.; Katona, C.; Jones, R.W.; DeCesare, J.; Rodger, M.; Group, C.-A.T. Donepezil for the treatment of agitation in Alzheimer's disease. *N Engl J Med*, **2007**, 357(14), 1382-1392.

[26] van Dyck, C.H.; Tariot, P.N.; Meyers, B.; Malca Resnick, E.; Memantine, M.E.M.M.D.S.G. A 24-week randomized, controlled trial of memantine in patients with moderate-to-severe Alzheimer disease. *Alzheimer Dis Assoc Disord*, **2007**, 21(2), 136-143.

[27] Winblad, B.; Cummings, J.; Andreasen, N.; Grossberg, G.; Onofrj, M.; Sadowsky, C.; Zechner, S.; Nagel, J.; Lane, R. A six-month double-blind, randomized, placebo-controlled study of a transdermal patch in Alzheimer's disease--rivastigmine patch versus capsule. *Int J Geriatr Psychiatry*, **2007**, 22(5), 456-467.

[28] Peskind, E.R.; Potkin, S.G.; Pomara, N.; Ott, B.R.; Graham, S.M.; Olin, J.T.; McDonald, S. Memantine treatment in mild to moderate Alzheimer disease: a 24-week randomized, controlled trial. *Am J Geriatr Psychiatry*, **2006**, 14(8), 704-715.

[29] Rockwood, K.; Fay, S.; Song, X.; MacKnight, C.; Gorman, M.; Video-Imaging Synthesis of Treating Alzheimer's Disease, I. Attainment of treatment goals by people with Alzheimer's disease receiving galantamine: a randomized controlled trial. *CMAJ*, **2006**, 174(8), 1099-1105.

[30] Winblad, B.; Kilander, L.; Eriksson, S.; Minthon, L.; Batsman, S.; Wetterholm, A.L.; Jansson-Blixt, C.; Haglund, A.; Severe Alzheimer's Disease Study, G. Donepezil in patients with severe Alzheimer's disease: double-blind, parallel-group, placebo-controlled study. *Lancet*, **2006**, 367(9516), 1057-1065.

[31] Brodaty, H.; Corey-Bloom, J.; Potocnik, F.C.; Truyen, L.; Gold, M.; Damaraju, C.R. Galantamine prolonged-release formulation in the treatment of mild to moderate Alzheimer's disease. *Dement Geriatr Cogn Disord*, **2005**, 20(2-3), 120-132.

[32] Karaman, Y.; Erdogan, F.; Koseoglu, E.; Turan, T.; Ersoy, A.O. A 12-month study of the efficacy of rivastigmine in patients with advanced moderate Alzheimer's disease. *Dement Geriatr Cogn Disord*, **2005**, 19(1), 51-56.

[33] Seltzer, B.; Zolnouni, P.; Nunez, M.; Goldman, R.; Kumar, D.; Ieni, J.; Richardson, S.; Donepezil "402" Study, G. Efficacy of donepezil in early-

stage Alzheimer disease: a randomized placebo-controlled trial. *Arch Neurol*, **2004**, *61*(12), 1852-1856.

[34] Tariot, P.N.; Farlow, M.R.; Grossberg, G.T.; Graham, S.M.; McDonald, S.; Gergel, I.; Memantine Study, G. Memantine treatment in patients with moderate to severe Alzheimer disease already receiving donepezil: a randomized controlled trial. *JAMA*, **2004**, *291*(3), 317-324.

[35] Asayama, K.; Yamadera, H.; Ito, T.; Suzuki, H.; Kudo, Y.; Endo, S. Double blind study of melatonin effects on the sleep-wake rhythm, cognitive and non-cognitive functions in Alzheimer type dementia. *J Nippon Med Sch*, **2003**, *70*(4), 334-341.

[36] Krishnan, K.R.; Charles, H.C.; Doraiswamy, P.M.; Mintzer, J.; Weisler, R.; Yu, X.; Perdomo, C.; Ieni, J.R.; Rogers, S. Randomized, placebo-controlled trial of the effects of donepezil on neuronal markers and hippocampal volumes in Alzheimer's disease. *Am J Psychiatry*, **2003**, *160*(11), 2003-2011.

[37] Reisberg, B.; Doody, R.; Stoffler, A.; Schmitt, F.; Ferris, S.; Mobius, H.J.; Memantine Study, G. Memantine in moderate-to-severe Alzheimer's disease. *N Engl J Med*, **2003**, *348*(14), 1333-1341.

[38] Singer, C.; Tractenberg, R.E.; Kaye, J.; Schafer, K.; Gamst, A.; Grundman, M.; Thomas, R.; Thal, L.J.; Alzheimer's Disease Cooperative, S. A multicenter, placebo-controlled trial of melatonin for sleep disturbance in Alzheimer's disease. *Sleep*, **2003**, *26*(7), 893-901.

[39] Tune, L.; Tiseo, P.J.; Ieni, J.; Perdomo, C.; Pratt, R.D.; Votaw, J.R.; Jewart, R.D.; Hoffman, J.M. Donepezil HCl (E2020) maintains functional brain activity in patients with Alzheimer disease: results of a 24-week, double-blind, placebo-controlled study. *Am J Geriatr Psychiatry*, **2003**, *11*(2), 169-177.

[40] Feldman, H.; Gauthier, S.; Hecker, J.; Vellas, B.; Subbiah, P.; Whalen, E.; Donepezil, M.S.I.G. A 24-week, randomized, double-blind study of donepezil in moderate to severe Alzheimer's disease. *Neurology*, **2001**, *57*(4), 613-620.

[41] Tariot, P.N.; Cummings, J.L.; Katz, I.R.; Mintzer, J.; Perdomo, C.A.; Schwam, E.M.; Whalen, E. A randomized, double-blind, placebo-controlled study of the efficacy and safety of donepezil in patients with Alzheimer's disease in the nursing home setting. *J Am Geriatr Soc*, **2001**, *49*(12), 1590-1599.

[42] Wilkinson, D.; Murray, J. Galantamine: a randomized, double-blind, dose comparison in patients with Alzheimer's disease. *Int J Geriatr Psychiatry*, **2001**, *16*(9), 852-857.

[43] Homma, A.; Takeda, M.; Imai, Y.; Udaka, F.; Hasegawa, K.; Kameyama, M.; Nishimura, T. Clinical efficacy and safety of donepezil on

- cognitive and global function in patients with Alzheimer's disease. A 24-week, multicenter, double-blind, placebo-controlled study in Japan. E2020 Study Group. *Dement Geriatr Cogn Disord*, **2000**, *11*(6), 299-313.
- [44] Raskind, M.A.; Peskind, E.R.; Wessel, T.; Yuan, W. Galantamine in AD: A 6-month randomized, placebo-controlled trial with a 6-month extension. The Galantamine USA-1 Study Group. *Neurology*, **2000**, *54*(12), 2261-2268.
- [45] Tariot, P.N.; Solomon, P.R.; Morris, J.C.; Kershaw, P.; Liliensfeld, S.; Ding, C. A 5-month, randomized, placebo-controlled trial of galantamine in AD. The Galantamine USA-10 Study Group. *Neurology*, **2000**, *54*(12), 2269-2276.
- [46] Wilcock, G.K.; Liliensfeld, S.; Gaens, E. Efficacy and safety of galantamine in patients with mild to moderate Alzheimer's disease: multicentre randomised controlled trial. Galantamine International-1 Study Group. *BMJ*, **2000**, *321*(7274), 1445-1449.
- [47] Burns, A.; Rossor, M.; Hecker, J.; Gauthier, S.; Petit, H.; Moller, H.J.; Rogers, S.L.; Friedhoff, L.T. The effects of donepezil in Alzheimer's disease - results from a multinational trial. *Dement Geriatr Cogn Disord*, **1999**, *10*(3), 237-244.
- [48] Forette, F.; Anand, R.; Gharabawi, G. A phase II study in patients with Alzheimer's disease to assess the preliminary efficacy and maximum tolerated dose of rivastigmine (Exelon). *Eur J Neurol*, **1999**, *6*(4), 423-429.
- [49] Rosler, M.; Anand, R.; Cicin-Sain, A.; Gauthier, S.; Agid, Y.; Dal-Bianco, P.; Stahelin, H.B.; Hartman, R.; Gharabawi, M. Efficacy and safety of rivastigmine in patients with Alzheimer's disease: international randomised controlled trial. *BMJ*, **1999**, *318*(7184), 633-638.
- [50] Rogers, S.L.; Farlow, M.R.; Doody, R.S.; Mohs, R.; Friedhoff, L.T. A 24-week, double-blind, placebo-controlled trial of donepezil in patients with Alzheimer's disease. Donepezil Study Group. *Neurology*, **1998**, *50*(1), 136-145.

**eTable 6A: SUCRA of the improvement of cognition (measured by MMSE)**

| Treatment | SUCRA |
|-----------|-------|
| MLT       | 83.4  |
| MED       | 81.1  |
| SHD       | 80.7  |
| GMMH      | 74.0  |
| SHM       | 73.0  |
| MHD       | 72.0  |
| MMD       | 70.4  |
| LHR       | 68.9  |
| RMMH      | 59.3  |
| DMMH      | 58.2  |
| EMG       | 54.7  |
| MHPR      | 53.6  |
| MEPR      | 52.8  |
| MHR       | 50.0  |
| MHM       | 41.6  |
| SLT       | 28.2  |
| EHM       | 28.2  |
| MLPR      | 27.8  |
| SMD       | 27.4  |

---

|     |      |
|-----|------|
| Pla | 19.5 |
| MMG | 17.5 |
| MLR | 15.5 |
| SHT | 12.2 |

---

Sorted by efficacy rankings, with superior treatments (those producing the greatest improvement in cognition) listed first



**eTable 6B: SUCRA of the improvement of cognition (measured by MMSE): subgroup of medium-term treatment duration**

| Treatment | SUCRA |
|-----------|-------|
| MLT       | 84.2  |
| MED       | 82.0  |
| GMMH      | 73.9  |
| MHD       | 71.2  |
| MMD       | 69.1  |
| RMMH      | 57.8  |
| DMMH      | 56.4  |
| MEPR      | 52.3  |
| MHPR      | 51.3  |
| MHR       | 48.1  |
| MHM       | 38.9  |
| MLPR      | 24.6  |
| Pla       | 15.2  |
| MMG       | 13.4  |
| MLR       | 11.6  |

Sorted by efficacy rankings, with superior treatments (those producing the greatest improvement in cognition) listed first

**eTable 6C: SUCRA of the improvement of cognition (measured by MMSE): subgroup of exclude concomitant medication**

| Treatment | SUCRA |
|-----------|-------|
| SHD       | 77.9  |
| GMMH      | 76.9  |
| MLT       | 74.6  |
| MHD       | 66.1  |
| MMD       | 66.0  |
| LHR       | 64.6  |
| DMMH      | 60.2  |
| RMMH      | 60.1  |
| SLT       | 50.6  |
| MEPR      | 49.2  |
| MHPR      | 48.4  |
| MHR       | 44.2  |
| MHM       | 42.6  |
| SMD       | 23.2  |
| MLPR      | 21.5  |
| Pla       | 13.4  |
| MLR       | 10.4  |

Sorted by efficacy rankings, with superior treatments (those producing the greatest improvement in cognition) listed first

**eTable 6D: SUCRA of the improvement of quality of life**

| Treatment | SUCRA |
|-----------|-------|
| MLT       | 11.0  |
| GMMH      | 13.9  |
| DMMH      | 20.8  |
| MHD       | 39.4  |
| SLG       | 39.5  |
| SLT       | 42.9  |
| MED       | 43.0  |
| SMG       | 43.4  |
| MEPR      | 46.4  |
| LHR       | 47.3  |
| MHPR      | 48.8  |
| RMMH      | 48.9  |
| MHG       | 49.5  |
| MHR       | 49.8  |
| MMD       | 52.7  |
| EHM       | 57.6  |
| SHR       | 61.3  |
| SHT       | 64.7  |
| MMG       | 64.9  |

---

|      |      |
|------|------|
| MLPR | 65.6 |
| MHM  | 66.5 |
| MEM  | 67.2 |
| MLR  | 71.9 |
| Pla  | 83.1 |

---

Sorted by efficacy rankings, with superior treatments (those producing the greatest improvement in quality of life) listed first

**eTable 6E: SUCRA of the improvement of behavioral disturbance**

| Treatment | SUCRA |
|-----------|-------|
| SHM       | 6.5   |
| SLT       | 13.2  |
| DMMH      | 23.8  |
| MEM       | 34.6  |
| SMG       | 35.4  |
| SHR       | 41.3  |
| SLG       | 45.8  |
| MMG       | 51.1  |
| MHR       | 56.1  |
| MEPR      | 56.5  |
| MMD       | 57.2  |
| MHM       | 59.7  |
| MHD       | 60.2  |
| EHM       | 61.5  |
| MHPR      | 63.7  |
| SHD       | 64.8  |
| SHT       | 70.5  |
| Pla       | 72.5  |
| MLPR      | 75.6  |

Sorted by efficacy rankings, with superior treatments (those producing the greatest improvement in behavioral disturbance) listed first

**eTable 6F: SUCRA of the acceptability in aspect of drop-out rate**

| Treatment | SUCRA |
|-----------|-------|
| SLT       | 88.4  |
| SMD       | 85.5  |
| DMMH      | 84.3  |
| SHD       | 80.9  |
| GMMH      | 77.8  |
| MMD       | 77.2  |
| MLR       | 71.3  |
| EMG       | 70.4  |
| Pla       | 66.6  |
| MHM       | 65.3  |
| SHT       | 62.9  |
| MEM       | 61.4  |
| EHM       | 58.7  |
| MHD       | 54.3  |
| SHM       | 44.1  |
| MLT       | 42.4  |
| MMG       | 41.2  |
| SLG       | 41.1  |
| RMMH      | 40.4  |

---

|      |      |
|------|------|
| SMG  | 38.7 |
| MLPR | 30.6 |
| MHPR | 28.2 |
| MEPR | 26.2 |
| MHG  | 16.9 |
| MHR  | 16.8 |
| MED  | 14.2 |
| SHR  | 9.0  |
| SHG  | 5.2  |

---

Sorted by tolerability rankings, with superior treatments (those producing the lowest drop-out rate) listed first

**eTable 6G: SUCRA of the rate of any adverse event reported**

| Treatment | SUCRA |
|-----------|-------|
| MLR       | 92.2  |
| MEM       | 87.0  |
| Pla       | 85.8  |
| MHM       | 83.8  |
| EHM       | 72.4  |
| SLG       | 71.4  |
| EMG       | 68.9  |
| MMD       | 66.2  |
| SHT       | 63.4  |
| LHR       | 63.4  |
| MMG       | 61.2  |
| GMMH      | 53.3  |
| MLPR      | 53.2  |
| MHPR      | 51.7  |
| SLT       | 47.4  |
| MHD       | 44.3  |
| SMG       | 42.4  |
| MLT       | 34.8  |
| RMMH      | 31.7  |



|      |      |
|------|------|
| DMMH | 27.9 |
| MHG  | 23.5 |
| MHR  | 22.0 |
| MEPR | 19.6 |
| MED  | 16.7 |
| SHG  | 15.0 |
| SHR  | 0.8  |

Sorted by tolerability rankings, with superior treatments (those producing the lowest rate of any adverse event reported) listed first

Abbreviation: CI: confidence interval; DMMH: medium-term high dose memantine plus high dose donepezil; EHM: extreme-long-term high dose memantine; EMG: extreme-long-term medium dose galantamine; ES: effect size; GMMH: medium-term high dose memantine plus low dose galantamine; LHR: long-term high dose rivastigmine; LLT: long-term low dose melatonin; MA: meta-analysis; MD: mean difference; MED: medium-term extreme high dose donepezil; MEM: medium-term extreme high dose memantine; MEPR: medium-term extreme high dose rivastigmine patch; MHD: medium-term high dose donepezil; MHG: medium-term high dose galantamine; MHM: medium-term high dose memantine; MHPR: medium-term high dose rivastigmine patch; MHR: medium-term high dose rivastigmine; MLPR: medium-term low dose rivastigmine patch; MLR: medium-term low dose rivastigmine; MLT: medium-term low dose melatonin; MMD: medium-term donepezil medium dose; MMG: medium-term medium dose galantamine; MMSE: mini-mental status examination; NMA: network meta-analysis; OR: odds ratio; Pla: Placebo; PRISMA: preferred reporting items for systematic reviews and meta-analyses; RCT: randomized controlled trial; RMMH: medium-term high dose memantine plus medium dose rivastigmine; SHD: short-term high dose donepezil; SHG: short-term high dose galantamine; SHM: short-term high dose memantine; SHR: short-term high dose rivastigmine; SHT: short-term high dose melatonin; SLG: short-term low dose galantamine; SLT: short-term low dose melatonin; SMD: short-term medium dose donepezil; SMG: short-term medium dose galantamine; SMT: short-term medium dose melatonin; StMD: standardized mean difference; SUCRA: surface under the cumulative ranking curve

**eTable 7A: League table of the improvement of cognition (measured by MMSE) : subgroup of medium-term treatment duration**

|                          |                          |                   |                          |                          |                   |                   |                          |                          |                          |                   |                   |                    |                          |                   |  |  |  |  |                          |
|--------------------------|--------------------------|-------------------|--------------------------|--------------------------|-------------------|-------------------|--------------------------|--------------------------|--------------------------|-------------------|-------------------|--------------------|--------------------------|-------------------|--|--|--|--|--------------------------|
|                          |                          |                   |                          |                          |                   |                   |                          |                          |                          |                   |                   |                    | <b>*1.48 (0.54,2.43)</b> |                   |  |  |  |  |                          |
| 0.14 (-1.10,1.38)        | MED                      |                   | 0.30 (-0.32,0.92)        |                          |                   |                   |                          |                          |                          |                   |                   |                    |                          |                   |  |  |  |  |                          |
| 0.16 (-1.69,2.01)        | 0.02 (-1.72,1.77)        | GMMH              |                          |                          | 0.41 (-1.07,1.89) | 0.45 (-0.85,1.75) |                          |                          |                          |                   |                   | 0.82 (-0.58,2.22)  |                          |                   |  |  |  |  |                          |
| 0.44 (-0.58,1.45)        | 0.30 (-0.41,1.01)        | 0.28 (-1.32,1.87) | MHD                      | 0.15 (-0.65,0.95)        |                   |                   |                          |                          |                          |                   |                   | -0.37 (-1.94,1.20) | <b>*1.08 (0.83,1.34)</b> |                   |  |  |  |  |                          |
| 0.43 (-0.81,1.66)        | 0.29 (-0.75,1.33)        | 0.26 (-1.48,2.01) | -0.01 (-0.78,0.75)       | MMD                      |                   |                   |                          |                          |                          |                   |                   |                    | <b>*1.21 (0.42,2.00)</b> |                   |  |  |  |  |                          |
| 0.57 (-1.42,2.56)        | 0.43 (-1.45,2.32)        | 0.41 (-1.11,1.93) | 0.13 (-1.62,1.89)        | 0.15 (-1.75,2.04)        | RMMH              | 0.04 (-1.45,1.53) |                          |                          |                          |                   |                   | 0.41 (-1.17,1.99)  |                          |                   |  |  |  |  |                          |
| 0.61 (-1.24,2.47)        | 0.47 (-1.28,2.22)        | 0.45 (-0.89,1.79) | 0.17 (-1.43,1.77)        | 0.19 (-1.57,1.94)        | 0.04 (-1.49,1.57) | DMMH              |                          |                          |                          |                   |                   | 0.37 (-1.04,1.78)  |                          |                   |  |  |  |  |                          |
| 0.76 (-0.37,1.89)        | 0.62 (-0.34,1.58)        | 0.60 (-1.08,2.27) | 0.32 (-0.33,0.97)        | 0.33 (-0.63,1.29)        | 0.19 (-1.64,2.01) | 0.15 (-1.54,1.83) | MEPR                     | -0.20 (-0.74,0.34)       | 0.10 (-0.43,0.63)        |                   |                   |                    | <b>*0.90 (0.35,1.45)</b> |                   |  |  |  |  |                          |
| 0.77 (-0.29,1.82)        | 0.63 (-0.24,1.50)        | 0.60 (-1.02,2.23) | 0.33 (-0.17,0.83)        | 0.34 (-0.53,1.21)        | 0.19 (-1.59,1.97) | 0.15 (-1.48,1.78) | 0.01 (-0.56,0.58)        | MHPR                     | 0.21 (-0.18,0.59)        |                   |                   | 0.30 (-0.23,0.83)  | 0.69 (-0.09,1.48)        |                   |  |  |  |  |                          |
| 0.82 (-0.25,1.89)        | 0.68 (-0.20,1.56)        | 0.66 (-0.97,2.29) | 0.38 (-0.14,0.91)        | 0.39 (-0.49,1.27)        | 0.25 (-1.54,2.03) | 0.21 (-1.43,1.84) | 0.06 (-0.51,0.63)        | 0.05 (-0.36,0.46)        | MHR                      |                   |                   |                    | <b>*0.83 (0.39,1.26)</b> |                   |  |  |  |  | <b>*0.94 (0.24,1.64)</b> |
| 0.98 (-0.18,2.14)        | 0.84 (-0.14,1.83)        | 0.82 (-0.62,2.26) | 0.54 (-0.13,1.22)        | 0.56 (-0.43,1.54)        | 0.41 (-1.20,2.02) | 0.37 (-1.08,1.82) | 0.22 (-0.63,1.08)        | 0.22 (-0.53,0.96)        | 0.16 (-0.60,0.93)        | MHM               |                   |                    | 0.33 (-0.31,0.97)        |                   |  |  |  |  |                          |
| <b>*1.28 (0.14,2.41)</b> | <b>*1.14 (0.18,2.10)</b> | 1.12 (-0.56,2.79) | <b>*0.84 (0.19,1.49)</b> | 0.85 (-0.11,1.81)        | 0.71 (-1.12,2.54) | 0.67 (-1.02,2.35) | 0.52 (-0.24,1.29)        | 0.51 (-0.07,1.10)        | 0.46 (-0.20,1.12)        | 0.30 (-0.56,1.15) | MLPR              |                    | 0.00 (-0.52,0.52)        |                   |  |  |  |  |                          |
| <b>*1.48 (0.51,2.46)</b> | <b>*1.35 (0.58,2.11)</b> | 1.32 (-0.25,2.89) | <b>*1.05 (0.76,1.33)</b> | <b>*1.06 (0.29,1.82)</b> | 0.91 (-0.82,2.65) | 0.87 (-0.71,2.45) | <b>*0.73 (0.15,1.30)</b> | <b>*0.72 (0.31,1.12)</b> | <b>*0.67 (0.23,1.10)</b> | 0.50 (-0.13,1.13) | 0.20 (-0.38,0.79) | Pla                | 0.70 (-1.67,3.07)        | 0.06 (-0.66,0.78) |  |  |  |  |                          |
| 2.18 (-0.40,4.77)        | 2.05 (-0.47,4.56)        | 2.02 (-0.84,4.88) | 1.75 (-0.66,4.16)        | 1.76 (-0.75,4.27)        | 1.61 (-1.34,4.57) | 1.57 (-1.30,4.44) | 1.43 (-1.04,3.89)        | 1.42 (-1.01,3.85)        | 1.37 (-1.07,3.80)        | 1.20 (-1.27,3.68) | 0.90 (-1.56,3.37) | 0.70 (-1.69,3.09)  | MMG                      |                   |  |  |  |  |                          |
| <b>*1.65 (0.45,2.86)</b> | <b>*1.52 (0.47,2.56)</b> | 1.49 (-0.23,3.21) | <b>*1.22 (0.45,1.98)</b> | <b>*1.23 (0.19,2.27)</b> | 1.08 (-0.79,2.95) | 1.04 (-0.69,2.77) | <b>*0.90 (0.04,1.75)</b> | <b>*0.89 (0.13,1.64)</b> | <b>*0.84 (0.13,1.54)</b> | 0.67 (-0.28,1.62) | 0.38 (-0.51,1.26) | 0.17 (-0.54,0.88)  | -0.53 (-3.03,1.97)       | MLR               |  |  |  |  |                          |

Pairwise (upper-right portion) and network (lower-left portion) meta-analysis results are presented as estimated effect sizes for the outcome of improvement of cognition in patients with tinnitus. Interventions are reported in order of mean ranking of cognition improvement, and outcomes are expressed as mean difference (MD) (95% confidence intervals). For the pairwise meta-analyses, MD of more than 0 indicate that the treatment specified in the row had more improvement than that specified in the column. For the network meta-analysis (NMA), MD of more than 0 indicate that the treatment specified in the column had more improvement than that specified in the row. Bold results marked with \* indicate statistical significance.

**eTable 7B: League table of the improvement of cognition (measured by MMSE) : subgroup of exclude concomitant medication**

|                              |                       |                              |                              |                              |                              |                       |                        |                       |                              |                              |                              |                        |                        |                       |  |  |                              |
|------------------------------|-----------------------|------------------------------|------------------------------|------------------------------|------------------------------|-----------------------|------------------------|-----------------------|------------------------------|------------------------------|------------------------------|------------------------|------------------------|-----------------------|--|--|------------------------------|
| SHD                          |                       |                              |                              |                              |                              |                       |                        |                       |                              |                              |                              |                        |                        |                       |  |  | <b>*1.50<br/>(0.15,2.85)</b> |
| 0.03 (-<br>2.15,2.21)        | GMMH                  |                              |                              |                              |                              | 0.45 (-<br>0.85,1.75) | 0.41 (-<br>1.89,1.07)  |                       |                              |                              |                              | 0.82 (-<br>0.58,2.22)  |                        |                       |  |  |                              |
| 0.10 (-<br>1.82,2.02)        | 0.07 (-<br>2.03,2.18) | MLT                          |                              |                              |                              |                       |                        |                       |                              |                              |                              |                        |                        |                       |  |  | <b>*1.40<br/>(0.17,2.63)</b> |
| 0.48 (-<br>0.97,1.92)        | 0.45 (-<br>1.23,2.12) | 0.38 (-<br>0.96,1.71)        | MHD                          | 0.15 (-<br>0.65,0.95)        |                              |                       |                        |                       |                              |                              |                              | -0.37 (-<br>1.94,1.20) |                        |                       |  |  | <b>*1.06<br/>(0.78,1.34)</b> |
| 0.45 (-<br>1.16,2.07)        | 0.42 (-<br>1.41,2.26) | 0.35 (-<br>1.17,1.87)        | -0.02 (-<br>0.82,0.77)       | MMD                          |                              |                       |                        |                       |                              |                              |                              |                        |                        |                       |  |  | <b>*1.21<br/>(0.42,2.00)</b> |
| 0.50 (-<br>0.99,1.99)        | 0.47 (-<br>1.26,2.20) | 0.40 (-<br>0.99,1.79)        | 0.02 (-<br>0.56,0.60)        | 0.05 (-<br>0.88,0.98)        | LHR                          |                       |                        |                       |                              |                              |                              |                        |                        |                       |  |  | <b>*1.00<br/>(0.72,1.28)</b> |
| 0.48 (-<br>1.70,2.66)        | 0.45 (-<br>0.91,1.81) | 0.38 (-<br>1.73,2.49)        | 0.00 (-<br>1.68,1.69)        | 0.03 (-<br>1.81,1.86)        | -0.02 (-<br>1.76,1.72)       | DMMH                  | -0.04 (-<br>1.53,1.45) |                       |                              |                              |                              | 0.37 (-<br>1.04,1.78)  |                        |                       |  |  |                              |
| 0.44 (-<br>1.86,2.74)        | 0.41 (-<br>1.13,1.95) | 0.34 (-<br>1.89,2.57)        | -0.04 (-<br>1.87,1.79)       | -0.01 (-<br>1.99,1.96)       | -0.06 (-<br>1.94,1.82)       |                       | -0.04 (-<br>1.59,1.51) | RMMH                  |                              |                              |                              | 0.41 (-<br>1.17,1.99)  |                        |                       |  |  |                              |
| 0.70 (-<br>2.05,3.45)        | 0.67 (-<br>2.21,3.55) | 0.60 (-<br>2.09,3.29)        | 0.22 (-<br>2.15,2.60)        | 0.25 (-<br>2.24,2.73)        | 0.20 (-<br>2.20,2.60)        | 0.22 (-<br>2.66,3.10) | 0.26 (-<br>2.71,3.23)  |                       | SLT                          |                              |                              |                        |                        |                       |  |  | 0.80 (-<br>1.52,3.12)        |
| 0.77 (-<br>0.77,2.31)        | 0.74 (-<br>1.02,2.51) | 0.67 (-<br>0.76,2.11)        | 0.29 (-<br>0.39,0.98)        | 0.32 (-<br>0.68,1.32)        | 0.27 (-<br>0.51,1.06)        | 0.29 (-<br>1.48,2.07) | 0.33 (-<br>1.58,2.24)  | 0.07 (-<br>2.36,2.50) | MEPR                         | -0.20 (-<br>0.74,0.34)       | 0.10 (-<br>0.43,0.63)        |                        |                        |                       |  |  | <b>*0.90<br/>(0.35,1.45)</b> |
| 0.78 (-<br>0.70,2.25)        | 0.75 (-<br>0.96,2.46) | 0.68 (-<br>0.69,2.05)        | 0.30 (-<br>0.23,0.84)        | 0.32 (-<br>0.58,1.23)        | 0.28 (-<br>0.37,0.93)        | 0.30 (-<br>1.42,2.02) | 0.34 (-<br>1.52,2.20)  | 0.08 (-<br>2.32,2.47) | 0.01 (-<br>0.60,0.61)        | MHPR                         | 0.21 (-<br>0.18,0.59)        | 0.30 (-<br>0.23,0.83)  |                        |                       |  |  | 0.69 (-<br>0.09,1.48)        |
| 0.83 (-<br>0.66,2.31)        | 0.80 (-<br>0.92,2.52) | 0.73 (-<br>0.65,2.11)        | 0.35 (-<br>0.21,0.91)        | 0.38 (-<br>0.54,1.29)        | 0.33 (-<br>0.34,1.00)        | 0.35 (-<br>1.38,2.08) | 0.39 (-<br>1.48,2.26)  | 0.13 (-<br>2.27,2.53) | 0.06 (-<br>0.55,0.67)        | 0.05 (-<br>0.38,0.49)        | MHR                          |                        |                        |                       |  |  | <b>*0.83<br/>(0.39,1.26)</b> |
| 0.85 (-<br>0.77,2.47)        | 0.82 (-<br>0.64,2.28) | 0.75 (-<br>0.77,2.27)        | 0.37 (-<br>0.46,1.20)        | 0.40 (-<br>0.71,1.50)        | 0.35 (-<br>0.58,1.28)        | 0.37 (-<br>1.10,1.84) | 0.41 (-<br>1.22,2.04)  | 0.15 (-<br>2.33,2.63) | 0.08 (-<br>0.92,1.07)        | 0.07 (-<br>0.82,0.97)        | 0.02 (-<br>0.89,0.93)        | MHM                    |                        |                       |  |  | 0.41 (-<br>0.40,1.22)        |
| 1.60 (-<br>0.83,4.03)        | 1.57 (-<br>1.01,4.15) | 1.50 (-<br>0.87,3.87)        | 1.12 (-<br>0.88,3.13)        | 1.15 (-<br>0.99,3.28)        | 1.10 (-<br>0.94,3.14)        | 1.12 (-<br>1.47,3.71) | 1.16 (-<br>1.53,3.85)  | 0.90 (-<br>2.18,3.98) | 0.83 (-<br>1.25,2.90)        | 0.82 (-<br>1.21,2.85)        | 0.77 (-<br>1.27,2.81)        | 0.75 (-<br>1.38,2.89)  | SMD                    |                       |  |  | -0.10 (-<br>2.04,1.84)       |
| 1.29 (-<br>0.25,2.83)        | 1.26 (-<br>0.50,3.03) | 1.19 (-<br>0.25,2.63)        | <b>*0.82<br/>(0.12,1.51)</b> | 0.84 (-<br>0.16,1.84)        | <b>*0.79<br/>(0.00,1.58)</b> | 0.81 (-<br>0.96,2.59) | 0.85 (-<br>1.06,2.77)  | 0.59 (-<br>1.84,3.03) | 0.52 (-<br>0.29,1.33)        | 0.51 (-<br>0.11,1.13)        | 0.46 (-<br>0.24,1.16)        | 0.44 (-<br>0.56,1.44)  | -0.31 (-<br>2.38,1.77) | MLPR                  |  |  | 0.00 (-<br>0.52,0.52)        |
| <b>*1.50<br/>(0.09,2.91)</b> | 1.47 (-<br>0.19,3.13) | <b>*1.40<br/>(0.10,2.70)</b> | <b>*1.02<br/>(0.71,1.34)</b> | <b>*1.05<br/>(0.26,1.84)</b> | <b>*1.00<br/>(0.51,1.49)</b> | 1.02 (-<br>0.64,2.69) | 1.06 (-<br>0.75,2.87)  | 0.80 (-<br>1.55,3.15) | <b>*0.73<br/>(0.12,1.34)</b> | <b>*0.72<br/>(0.29,1.15)</b> | <b>*0.67<br/>(0.21,1.13)</b> | 0.65 (-<br>0.14,1.44)  | -0.10 (-<br>2.08,1.88) | 0.21 (-<br>0.41,0.83) |  |  | 0.06 (-<br>0.66,0.78)        |
| <b>*1.67<br/>(0.07,3.26)</b> | 1.64 (-<br>0.17,3.45) | <b>*1.57<br/>(0.07,3.06)</b> | <b>*1.19<br/>(0.39,1.99)</b> | <b>*1.21<br/>(0.13,2.30)</b> | <b>*1.17<br/>(0.28,2.05)</b> | 1.19 (-<br>0.63,3.01) | 1.23 (-<br>0.73,3.18)  | 0.97 (-<br>1.50,3.44) | 0.90 (-<br>0.00,1.79)        | <b>*0.89<br/>(0.10,1.68)</b> | <b>*0.84<br/>(0.10,1.57)</b> | 0.82 (-<br>0.26,1.90)  | 0.07 (-<br>2.05,2.18)  | 0.38 (-<br>0.56,1.31) |  |  | 0.17 (-<br>0.57,0.91)        |
|                              |                       |                              |                              |                              |                              |                       |                        |                       |                              |                              |                              |                        |                        |                       |  |  | MLR                          |

Pairwise (upper-right portion) and network (lower-left portion) meta-analysis results are presented as estimated effect sizes for the outcome of improvement of cognition in patients with tinnitus. Interventions are reported in order of mean ranking of cognition improvement, and outcomes are expressed as mean difference (MD) (95% confidence intervals). For the pairwise meta-analyses, MD of more than 0 indicate that the treatment specified in the row had more improvement than that specified in the column. For the network meta-analysis (NMA), MD of more than 0 indicate that the treatment specified in the column had more improvement than that specified in the row. Bold results marked with \* indicate statistical significance.



|                             |                    |                             |                             |                    |                    |                    |                    |                    |                    |                    |                    |                    |                    |                    |                    |                    |                    |                    |                    |                    |                    |                    |                    |
|-----------------------------|--------------------|-----------------------------|-----------------------------|--------------------|--------------------|--------------------|--------------------|--------------------|--------------------|--------------------|--------------------|--------------------|--------------------|--------------------|--------------------|--------------------|--------------------|--------------------|--------------------|--------------------|--------------------|--------------------|--------------------|
| -0.55 (-1.27,0.17)          | -0.55 (-1.40,0.30) | -0.38 (-1.05,0.29)          | -0.19 (-0.75,0.38)          | -0.21 (-0.88,0.47) | -0.19 (-0.72,0.34) | -0.18 (-0.87,0.52) | -0.18 (-0.86,0.50) | -0.15 (-0.80,0.50) | -0.16 (-1.05,0.74) | -0.12 (-0.72,0.47) | -0.14 (-0.98,0.71) | -0.13 (-0.80,0.53) | -0.12 (-0.72,0.47) | -0.10 (-0.70,0.51) | -0.06 (-0.76,0.63) | -0.00 (-0.84,0.84) | SHT                |                    |                    |                    |                    |                    | 0.08 (-0.30,0.47)  |
| -0.52 (-1.07,0.02)          | -0.52 (-1.23,0.18) | -0.36 (-0.83,0.12)          | -0.16 (-0.47,0.15)          | -0.18 (-0.66,0.30) | -0.17 (-0.72,0.39) | -0.15 (-0.66,0.36) | -0.15 (-0.64,0.34) | -0.12 (-0.57,0.32) | -0.13 (-0.89,0.63) | -0.10 (-0.45,0.26) | -0.11 (-0.81,0.59) | -0.10 (-0.50,0.30) | -0.09 (-0.46,0.27) | -0.07 (-0.45,0.31) | -0.04 (-0.55,0.47) | 0.02 (-0.67,0.72)  | 0.03 (-0.56,0.61)  | MMG                |                    |                    |                    |                    | -0.11 (-0.22,0.00) |
| -0.54 (-1.13,0.04)          | -0.54 (-1.28,0.19) | -0.38 (-0.90,0.14)          | -0.18 (-0.56,0.20)          | -0.20 (-0.73,0.33) | -0.19 (-0.78,0.41) | -0.17 (-0.72,0.38) | -0.17 (-0.71,0.36) | -0.14 (-0.58,0.30) | -0.15 (-0.94,0.64) | -0.12 (-0.40,0.16) | -0.13 (-0.86,0.60) | -0.12 (-0.64,0.39) | -0.11 (-0.47,0.25) | -0.09 (-0.53,0.34) | -0.06 (-0.61,0.50) | 0.00 (-0.72,0.73)  | 0.01 (-0.62,0.63)  | -0.02 (-0.43,0.39) | MLPR               |                    |                    |                    | -0.11 (-0.28,0.06) |
| <b>*-0.54 (-1.07,-0.01)</b> | -0.54 (-1.18,0.11) | -0.37 (-0.79,0.04)          | -0.17 (-0.42,0.07)          | -0.19 (-0.66,0.27) | -0.18 (-0.72,0.36) | -0.17 (-0.64,0.30) | -0.17 (-0.64,0.30) | -0.14 (-0.56,0.28) | -0.15 (-0.90,0.61) | -0.11 (-0.44,0.21) | -0.13 (-0.77,0.52) | -0.12 (-0.57,0.33) | -0.11 (-0.44,0.22) | -0.09 (-0.43,0.25) | -0.05 (-0.54,0.44) | 0.01 (-0.67,0.69)  | 0.01 (-0.56,0.58)  | -0.02 (-0.33,0.30) | 0.00 (-0.38,0.39)  | MHM                |                    |                    | -0.05 (-0.36,0.26) |
| -0.56 (-1.19,0.08)          | -0.56 (-1.33,0.22) | -0.39 (-0.96,0.19)          | -0.19 (-0.64,0.26)          | -0.21 (-0.80,0.37) | -0.20 (-0.84,0.45) | -0.18 (-0.78,0.42) | -0.18 (-0.77,0.40) | -0.15 (-0.71,0.40) | -0.16 (-0.99,0.67) | -0.13 (-0.61,0.36) | -0.14 (-0.92,0.63) | -0.14 (-0.71,0.44) | -0.12 (-0.61,0.36) | -0.10 (-0.60,0.40) | -0.07 (-0.67,0.54) | -0.01 (-0.78,0.76) | -0.00 (-0.68,0.67) | -0.03 (-0.51,0.45) | -0.01 (-0.54,0.51) | -0.02 (-0.47,0.44) | MEM                |                    | -0.08 (-0.24,0.07) |
| -0.60 (-1.23,0.03)          | -0.60 (-1.37,0.17) | -0.43 (-1.00,0.13)          | -0.23 (-0.67,0.20)          | -0.25 (-0.83,0.32) | -0.24 (-0.88,0.39) | -0.23 (-0.82,0.36) | -0.23 (-0.81,0.35) | -0.20 (-0.70,0.31) | -0.21 (-1.03,0.62) | -0.17 (-0.61,0.26) | -0.19 (-0.95,0.58) | -0.18 (-0.74,0.38) | -0.17 (-0.56,0.23) | -0.15 (-0.63,0.34) | -0.11 (-0.71,0.48) | -0.05 (-0.81,0.71) | -0.05 (-0.71,0.61) | -0.08 (-0.54,0.39) | -0.06 (-0.54,0.43) | -0.06 (-0.50,0.38) | -0.04 (-0.61,0.52) | MLR                | -0.04 (-0.23,0.15) |
| <b>*-0.64 (-1.13,-0.15)</b> | -0.64 (-1.30,0.02) | <b>*-0.47 (-0.88,-0.07)</b> | <b>*-0.27 (-0.46,-0.09)</b> | -0.29 (-0.71,0.12) | -0.28 (-0.78,0.22) | -0.26 (-0.71,0.18) | -0.27 (-0.69,0.16) | -0.24 (-0.60,0.13) | -0.24 (-0.97,0.48) | -0.21 (-0.47,0.05) | -0.22 (-0.88,0.43) | -0.22 (-0.62,0.18) | -0.21 (-0.47,0.06) | -0.19 (-0.47,0.10) | -0.15 (-0.60,0.30) | -0.09 (-0.74,0.56) | -0.09 (-0.62,0.45) | -0.11 (-0.36,0.13) | -0.09 (-0.42,0.23) | -0.10 (-0.30,0.10) | -0.08 (-0.49,0.33) | -0.04 (-0.43,0.35) | Pla                |

Pairwise (upper-right portion) and network (lower-left portion) meta-analysis results are presented as estimated effect sizes for the outcome of improvement of quality of life in patients with tinnitus. Interventions are reported in order of mean ranking of quality of life improvement, and outcomes are expressed as standardized mean difference (StMD) (95% confidence intervals). For the pairwise meta-analyses, StMD of less than 0 indicate that the treatment specified in the row had more improvement than that specified in the column. For the network meta-analysis (NMA), StMD of less than 0 indicate that the treatment specified in the column had more improvement than that specified in the row. Bold results marked with \* indicate statistical significance.

**eTable 7D: League table of the improvement of behavioral disturbance**

|                                  |                                  |                        |                        |                        |                        |                        |                        |     |     |                        |  |     |                          |                        |                        |  |  |                          |                          |                        |                        |                        |                        |                       |                        |                       |
|----------------------------------|----------------------------------|------------------------|------------------------|------------------------|------------------------|------------------------|------------------------|-----|-----|------------------------|--|-----|--------------------------|------------------------|------------------------|--|--|--------------------------|--------------------------|------------------------|------------------------|------------------------|------------------------|-----------------------|------------------------|-----------------------|
| SHM                              |                                  |                        |                        |                        |                        |                        |                        |     |     |                        |  |     |                          |                        |                        |  |  | *-0.55 (-<br>0.90,-0.21) |                          |                        |                        |                        |                        |                       |                        |                       |
| -0.10 (-<br>0.73,0.52)           | SLT                              |                        |                        |                        |                        |                        |                        |     |     |                        |  |     |                          |                        |                        |  |  | *-0.50 (-<br>0.88,-0.11) | *-0.45 (-<br>0.83,-0.07) |                        |                        |                        |                        |                       |                        |                       |
| -0.25 (-<br>0.81,0.31)           | -0.14 (-<br>0.73,0.44)           | DMMH                   |                        |                        |                        |                        |                        |     |     |                        |  |     | *-0.26 (-<br>0.48,-0.04) |                        |                        |  |  |                          |                          |                        |                        |                        |                        |                       |                        |                       |
| -0.36 (-<br>0.87,0.16)           | -0.25 (-<br>0.80,0.29)           | -0.11 (-<br>0.58,0.36) | MEM                    |                        |                        |                        |                        |     |     |                        |  |     |                          |                        |                        |  |  |                          | *-0.20 (-<br>0.35,-0.04) |                        |                        |                        |                        |                       |                        |                       |
| -0.35 (-<br>0.88,0.18)           | -0.25 (-<br>0.80,0.31)           | -0.10 (-<br>0.58,0.38) | 0.01 (-<br>0.42,0.44)  | SMG                    |                        |                        |                        |     |     |                        |  |     |                          |                        |                        |  |  |                          | *-0.20 (-<br>0.39,-0.02) |                        |                        |                        |                        |                       |                        |                       |
| -0.35 (-<br>1.07,0.38)           | -0.24 (-<br>0.99,0.50)           | -0.10 (-<br>0.79,0.59) | 0.01 (-<br>0.65,0.67)  | 0.00 (-<br>0.66,0.67)  | SHR                    |                        |                        |     |     |                        |  |     |                          |                        |                        |  |  |                          | -0.21 (-<br>0.74,0.32)   |                        |                        |                        |                        |                       |                        |                       |
| -0.42 (-<br>0.94,0.10)           | -0.31 (-<br>0.86,0.24)           | -0.17 (-<br>0.65,0.30) | -0.06 (-<br>0.48,0.36) | -0.07 (-<br>0.37,0.24) | -0.07 (-<br>0.73,0.59) |                        |                        | SLG |     |                        |  |     |                          |                        |                        |  |  |                          | -0.14 (-<br>0.31,0.03)   |                        |                        |                        |                        |                       |                        |                       |
| -0.45 (-<br>0.98,0.07)           | -0.35 (-<br>0.90,0.20)           | -0.21 (-<br>0.68,0.27) | -0.10 (-<br>0.52,0.33) | -0.10 (-<br>0.54,0.33) | -0.11 (-<br>0.77,0.55) | -0.04 (-<br>0.47,0.39) |                        |     | MMG |                        |  |     |                          |                        |                        |  |  |                          | -0.10 (-<br>0.28,0.08)   |                        |                        |                        |                        |                       |                        |                       |
| -0.48 (-<br>0.97,0.01)           | -0.38 (-<br>0.89,0.14)           | -0.23 (-<br>0.67,0.21) | -0.12 (-<br>0.51,0.26) | -0.13 (-<br>0.53,0.27) | -0.13 (-<br>0.77,0.50) | -0.06 (-<br>0.45,0.33) | -0.03 (-<br>0.42,0.37) |     | MHR | 0.01 (-<br>0.15,0.17)  |  |     |                          |                        |                        |  |  |                          | -0.04 (-<br>0.18,0.07)   |                        |                        |                        |                        |                       |                        |                       |
| -0.49 (-<br>0.99,0.02)           | -0.38 (-<br>0.92,0.15)           | -0.24 (-<br>0.70,0.22) | -0.13 (-<br>0.53,0.27) | -0.14 (-<br>0.55,0.28) | -0.14 (-<br>0.79,0.51) | -0.07 (-<br>0.48,0.34) | -0.03 (-<br>0.44,0.38) |     |     | -0.01 (-<br>0.28,0.27) |  |     |                          |                        |                        |  |  |                          | -0.05 (-<br>0.21,0.11)   |                        |                        |                        |                        |                       |                        |                       |
| -0.50 (-<br>1.04,0.04)           | -0.39 (-<br>0.96,0.17)           | -0.25 (-<br>0.72,0.22) | -0.14 (-<br>0.59,0.30) | -0.15 (-<br>0.61,0.31) | -0.15 (-<br>0.83,0.52) | -0.08 (-<br>0.53,0.37) | -0.04 (-<br>0.50,0.41) |     |     | -0.02 (-<br>0.43,0.40) |  | MMD |                          | -0.07 (-<br>0.35,0.22) |                        |  |  |                          | 0.00 (-<br>0.28,0.28)    |                        |                        |                        |                        |                       |                        |                       |
| <b>*-0.51 (-<br/>0.95,-0.06)</b> | -0.40 (-<br>0.88,0.08)           | -0.26 (-<br>0.64,0.13) | -0.15 (-<br>0.48,0.18) | -0.16 (-<br>0.50,0.19) | -0.16 (-<br>0.76,0.44) | -0.09 (-<br>0.42,0.25) | -0.05 (-<br>0.39,0.28) |     |     | -0.03 (-<br>0.31,0.26) |  |     | MHM                      |                        | -0.00 (-<br>0.31,0.30) |  |  |                          | -0.04 (-<br>0.14,0.06)   |                        |                        |                        |                        |                       |                        |                       |
| <b>*-0.51 (-<br/>0.96,-0.06)</b> | -0.40 (-<br>0.89,0.08)           | -0.26 (-<br>0.59,0.07) | -0.15 (-<br>0.48,0.18) | -0.16 (-<br>0.50,0.19) | -0.16 (-<br>0.77,0.44) | -0.09 (-<br>0.43,0.25) | -0.05 (-<br>0.39,0.29) |     |     | -0.03 (-<br>0.31,0.26) |  |     |                          | MHD                    |                        |  |  |                          | -0.04 (-<br>0.31,0.24)   |                        |                        |                        |                        |                       |                        |                       |
| -0.52 (-<br>1.06,0.02)           | -0.42 (-<br>0.99,0.15)           | -0.27 (-<br>0.77,0.22) | -0.16 (-<br>0.61,0.28) | -0.17 (-<br>0.63,0.29) | -0.17 (-<br>0.85,0.50) | -0.10 (-<br>0.55,0.35) | -0.07 (-<br>0.52,0.39) |     |     | -0.04 (-<br>0.46,0.37) |  |     |                          | -0.02 (-<br>0.50,0.45) |                        |  |  |                          | -0.03 (-<br>0.26,0.19)   |                        |                        |                        |                        |                       |                        |                       |
| <b>*-0.53 (-<br/>1.00,-0.06)</b> | -0.42 (-<br>0.92,0.08)           | -0.28 (-<br>0.70,0.13) | -0.17 (-<br>0.53,0.18) | -0.18 (-<br>0.55,0.19) | -0.18 (-<br>0.80,0.44) | -0.11 (-<br>0.47,0.25) | -0.07 (-<br>0.44,0.29) |     |     | -0.05 (-<br>0.26,0.16) |  |     |                          | -0.02 (-<br>0.42,0.36) |                        |  |  |                          | -0.02 (-<br>0.14,0.09)   | -0.08 (-<br>0.19,0.03) |                        |                        |                        |                       |                        |                       |
| -0.54 (-<br>1.11,0.02)           | -0.44 (-<br>1.03,0.15)           | -0.29 (-<br>0.82,0.23) | -0.18 (-<br>0.66,0.29) | -0.19 (-<br>0.68,0.29) | -0.19 (-<br>0.89,0.50) | -0.12 (-<br>0.60,0.36) | -0.09 (-<br>0.57,0.40) |     |     | -0.06 (-<br>0.51,0.38) |  |     |                          | -0.04 (-<br>0.52,0.41) |                        |  |  |                          | -0.01 (-<br>0.29,0.26)   |                        |                        |                        |                        |                       |                        |                       |
| -0.60 (-<br>1.22,0.03)           | <b>*-0.49 (-<br/>0.96,-0.03)</b> | -0.35 (-<br>0.94,0.24) | -0.24 (-<br>0.79,0.30) | -0.25 (-<br>0.81,0.31) | -0.25 (-<br>1.00,0.49) | -0.18 (-<br>0.73,0.37) | -0.14 (-<br>0.70,0.41) |     |     | -0.12 (-<br>0.64,0.40) |  |     |                          | -0.11 (-<br>0.65,0.42) |                        |  |  |                          | -0.07 (-<br>0.57,0.43)   | -0.06 (-<br>0.65,0.53) |                        |                        |                        |                       |                        |                       |
| <b>*-0.55 (-<br/>0.98,-0.13)</b> | -0.45 (-<br>0.91,0.01)           | -0.31 (-<br>0.67,0.06) | -0.20 (-<br>0.49,0.10) | -0.20 (-<br>0.52,0.11) | -0.21 (-<br>0.79,0.38) | -0.14 (-<br>0.44,0.17) | -0.10 (-<br>0.41,0.21) |     |     | -0.07 (-<br>0.32,0.17) |  |     |                          | -0.06 (-<br>0.34,0.21) |                        |  |  |                          | -0.05 (-<br>0.19,0.09)   | -0.05 (-<br>0.20,0.10) | -0.03 (-<br>0.37,0.30) | -0.03 (-<br>0.22,0.17) | -0.01 (-<br>0.39,0.36) | 0.05 (-<br>0.41,0.51) | Pla                    | 0.00 (-<br>0.17,0.17) |
| <b>*-0.59 (-<br/>1.08,-0.11)</b> | -0.49 (-<br>1.01,0.03)           | -0.35 (-<br>0.79,0.09) | -0.24 (-<br>0.62,0.14) | -0.24 (-<br>0.64,0.15) | -0.25 (-<br>0.88,0.39) | -0.18 (-<br>0.56,0.21) | -0.14 (-<br>0.53,0.25) |     |     | -0.11 (-<br>0.39,0.16) |  |     |                          | -0.10 (-<br>0.51,0.32) |                        |  |  |                          | -0.09 (-<br>0.37,0.19)   | -0.09 (-<br>0.37,0.20) | -0.07 (-<br>0.49,0.34) | -0.07 (-<br>0.27,0.14) | -0.05 (-<br>0.50,0.39) | 0.00 (-<br>0.52,0.52) | -0.04 (-<br>0.28,0.20) | MLPR                  |

Pairwise (upper-right portion) and network (lower-left portion) meta-analysis results are presented as estimated effect sizes for the outcome of improvement of behavioral disturbance in patients with tinnitus.

Interventions are reported in order of mean ranking of behavioral disturbance improvement, and outcomes are expressed as standardized mean difference (StMD) (95% confidence intervals). For the pairwise meta-analyses, StMD of less than 0 indicate that the treatment specified in the row had more improvement than that specified in the column. For the network meta-analysis (NMA), StMD of less than 0 indicate that the treatment specified in the column had more improvement than that specified in the row. Bold results marked with \* indicate statistical significance.



|                                 |                         |                                 |                                 |                         |                                 |                                 |                                 |                                 |                                 |                         |                                 |                                 |                                 |                                 |                         |                                 |                                 |                         |                                 |                                 |                                 |                                 |                         |                         |                         |                         |                                 |  |  |  |  |
|---------------------------------|-------------------------|---------------------------------|---------------------------------|-------------------------|---------------------------------|---------------------------------|---------------------------------|---------------------------------|---------------------------------|-------------------------|---------------------------------|---------------------------------|---------------------------------|---------------------------------|-------------------------|---------------------------------|---------------------------------|-------------------------|---------------------------------|---------------------------------|---------------------------------|---------------------------------|-------------------------|-------------------------|-------------------------|-------------------------|---------------------------------|--|--|--|--|
| 0.21<br>(0.03,1.2<br>4)         | 0.13<br>(0.01,2.9<br>7) | <b>*0.43</b><br>(0.22,0.8<br>3) | 0.45<br>(0.19,1.0<br>6)         | 0.21<br>(0.01,5.1<br>4) | <b>*0.57</b><br>(0.38,0.8<br>5) | 0.60<br>(0.33,1.0<br>9)         | <b>*0.63</b><br>(0.41,0.9<br>8) | <b>*0.68</b><br>(0.52,0.8<br>9) | 0.70<br>(0.49,1.0<br>0)         | 0.60<br>(0.15,2.4<br>7) | 0.74<br>(0.43,1.2<br>9)         | 0.75<br>(0.41,1.3<br>8)         | 0.81<br>(0.58,1.1<br>2)         | 0.98<br>(0.43,2.2<br>2)         | 1.04<br>(0.35,3.1<br>0) | MMG                             |                                 |                         |                                 |                                 |                                 | <b>*0.69</b><br>(0.51,0.9<br>3) |                         |                         |                         |                         |                                 |  |  |  |  |
| 0.20<br>(0.03,1.2<br>6)         | 0.12<br>(0.01,2.9<br>8) | <b>*0.42</b><br>(0.20,0.9<br>3) | 0.45<br>(0.18,1.1<br>3)         | 0.21<br>(0.01,5.1<br>6) | <b>*0.56</b><br>(0.33,0.9<br>6) | 0.59<br>(0.29,1.1<br>9)         | 0.62<br>(0.35,1.1<br>0)         | 0.67<br>(0.43,1.0<br>5)         | 0.69<br>(0.41,1.1<br>4)         | 0.59<br>(0.14,2.5<br>4) | 0.73<br>(0.38,1.4<br>1)         | 0.74<br>(0.37,1.5<br>0)         | 0.79<br>(0.48,1.3<br>0)         | 0.96<br>(0.39,2.3<br>5)         | 1.02<br>(0.32,3.2<br>3) | 0.98<br>(0.58,1.6<br>6)         | SLG                             |                         |                                 | 0.98<br>(0.68,1.4<br>1)         |                                 |                                 |                         |                         |                         |                         |                                 |  |  |  |  |
| 0.18<br>(0.01,2.6<br>1)         | 0.11<br>(0.00,4.5<br>7) | 0.37<br>(0.05,2.6<br>7)         | 0.39<br>(0.05,3.4<br>3)         | 0.18<br>(0.01,4.0<br>8) | 0.49<br>(0.07,3.7<br>4)         | 0.52<br>(0.07,4.1<br>2)         | 0.55<br>(0.07,4.2<br>0)         | 0.59<br>(0.08,4.4<br>0)         | 0.60<br>(0.08,4.5<br>2)         | 0.52<br>(0.05,5.9<br>9) | 0.65<br>(0.08,5.0<br>8)         | 0.65<br>(0.08,5.2<br>2)         | 0.70<br>(0.09,5.1<br>0)         | 0.85<br>(0.10,7.2<br>8)         | 0.90<br>(0.09,8.7<br>3) | 0.87<br>(0.11,6.5<br>7)         | 0.88<br>(0.11,6.9<br>0)         | RMMH                    |                                 |                                 |                                 |                                 |                         |                         |                         |                         |                                 |  |  |  |  |
| 0.20<br>(0.03,1.2<br>0)         | 0.12<br>(0.00,2.8<br>5) | <b>*0.41</b><br>(0.20,0.8<br>4) | 0.43<br>(0.18,1.0<br>5)         | 0.20<br>(0.01,4.9<br>4) | <b>*0.54</b><br>(0.33,0.8<br>8) | 0.49<br>(0.29,1.1<br>1)         | 0.57<br>(0.36,1.0<br>1)         | <b>*0.65</b><br>(0.44,0.9<br>5) | 0.66<br>(0.42,1.0<br>4)         | 0.57<br>(0.14,2.4<br>3) | 0.71<br>(0.38,1.3<br>1)         | 0.71<br>(0.37,1.3<br>9)         | 0.76<br>(0.49,1.1<br>8)         | 0.93<br>(0.39,2.2<br>0)         | 0.99<br>(0.32,3.0<br>2) | 0.95<br>(0.59,1.5<br>0)         | 0.96<br>(0.62,1.5<br>3)         | 1.09<br>(0.14,8.4<br>3) | SMG                             |                                 |                                 |                                 |                         |                         |                         |                         | <b>*0.40</b><br>(0.21,0.7<br>7) |  |  |  |  |
| 0.17<br>(0.03,1.0<br>4)         | 0.10<br>(0.00,2.4<br>7) | <b>*0.35</b><br>(0.17,0.7<br>2) | <b>*0.37</b><br>(0.15,0.9<br>1) | 0.17<br>(0.01,4.2<br>7) | <b>*0.47</b><br>(0.29,0.7<br>6) | <b>*0.49</b><br>(0.26,0.9<br>1) | <b>*0.52</b><br>(0.31,0.8<br>8) | <b>*0.56</b><br>(0.38,0.8<br>3) | <b>*0.57</b><br>(0.36,0.9<br>0) | 0.49<br>(0.12,2.0<br>8) | 0.61<br>(0.33,1.1<br>3)         | 0.62<br>(0.32,1.2<br>0)         | 0.66<br>(0.43,1.0<br>2)         | 0.80<br>(0.34,1.9<br>0)         | 0.85<br>(0.28,2.6<br>3) | 0.82<br>(0.51,1.3<br>2)         | 0.83<br>(0.46,1.5<br>1)         | 0.94<br>(0.12,7.3<br>0) | 0.86<br>(0.50,1.5<br>0)         | MLPR                            |                                 | 1.03<br>(0.81,1.3<br>1)         |                         |                         |                         |                         |                                 |  |  |  |  |
| 0.17<br>(0.03,1.0<br>0)         | 0.10<br>(0.00,2.3<br>9) | <b>*0.35</b><br>(0.17,0.6<br>6) | <b>*0.36</b><br>(0.15,0.8<br>3) | 0.17<br>(0.01,4.1<br>3) | <b>*0.46</b><br>(0.29,0.7<br>0) | <b>*0.48</b><br>(0.27,0.8<br>4) | <b>*0.51</b><br>(0.32,0.8<br>1) | <b>*0.54</b><br>(0.40,0.7<br>5) | <b>*0.56</b><br>(0.37,0.8<br>3) | 0.48<br>(0.12,1.9<br>6) | 0.59<br>(0.33,1.0<br>3)         | 0.60<br>(0.32,1.1<br>1)         | <b>*0.64</b><br>(0.44,0.9<br>4) | 0.78<br>(0.34,1.8<br>0)         | 0.83<br>(0.28,2.5<br>1) | 0.80<br>(0.53,1.2<br>1)         | 0.81<br>(0.47,1.4<br>1)         | 0.92<br>(0.12,7.0<br>2) | 0.84<br>(0.51,1.3<br>9)         | 0.97<br>(0.71,1.3<br>3)         | MHPR                            |                                 | 0.92<br>(0.62,1.3<br>6) |                         | 0.94<br>(0.70,1.2<br>5) |                         |                                 |  |  |  |  |
| <b>*0.16</b><br>(0.03,0.9<br>8) | 0.10<br>(0.00,2.3<br>3) | <b>*0.33</b><br>(0.16,0.7<br>0) | <b>*0.35</b><br>(0.14,0.8<br>8) | 0.16<br>(0.01,4.0<br>3) | <b>*0.44</b><br>(0.25,0.7<br>5) | <b>*0.46</b><br>(0.24,0.8<br>8) | <b>*0.49</b><br>(0.28,0.8<br>6) | <b>*0.52</b><br>(0.33,0.8<br>3) | <b>*0.53</b><br>(0.32,0.8<br>9) | 0.46<br>(0.11,1.9<br>9) | 0.57<br>(0.29,1.1<br>2)         | 0.58<br>(0.29,1.1<br>7)         | 0.62<br>(0.38,1.0<br>1)         | 0.75<br>(0.31,1.8<br>4)         | 0.80<br>(0.25,2.5<br>3) | 0.77<br>(0.45,1.3<br>0)         | 0.78<br>(0.41,1.4<br>8)         | 0.88<br>(0.11,6.9<br>2) | 0.81<br>(0.45,1.4<br>7)         | 0.94<br>(0.56,1.5<br>7)         | 0.96<br>(0.62,1.4<br>9)         | MEPR                            |                         |                         | 0.96<br>(0.64,1.4<br>2) |                         |                                 |  |  |  |  |
| <b>*0.13</b><br>(0.02,0.7<br>9) | 0.08<br>(0.00,1.8<br>9) | <b>*0.27</b><br>(0.14,0.5<br>5) | <b>*0.29</b><br>(0.12,0.6<br>9) | 0.13<br>(0.01,3.2<br>6) | <b>*0.36</b><br>(0.23,0.5<br>7) | <b>*0.38</b><br>(0.20,0.7<br>2) | <b>*0.40</b><br>(0.24,0.6<br>5) | <b>*0.43</b><br>(0.30,0.6<br>1) | <b>*0.44</b><br>(0.29,0.6<br>7) | 0.38<br>(0.09,1.5<br>8) | <b>*0.47</b><br>(0.26,0.8<br>5) | <b>*0.47</b><br>(0.25,0.9<br>0) | <b>*0.51</b><br>(0.34,0.7<br>6) | 0.62<br>(0.26,1.4<br>4)         | 0.66<br>(0.21,2.0<br>0) | <b>*0.63</b><br>(0.45,0.8<br>8) | 0.64<br>(0.36,1.1<br>4)         | 0.73<br>(0.09,5.5<br>6) | 0.66<br>(0.39,1.1<br>2)         | 0.77<br>(0.45,1.3<br>0)         | 0.79<br>(0.49,1.2<br>7)         | 0.82<br>(0.46,1.4<br>6)         | MHG                     |                         |                         |                         |                                 |  |  |  |  |
| <b>*0.13</b><br>(0.02,0.8<br>1) | 0.08<br>(0.00,1.9<br>3) | <b>*0.28</b><br>(0.14,0.5<br>5) | <b>*0.29</b><br>(0.12,0.7<br>0) | 0.14<br>(0.01,3.3<br>4) | <b>*0.37</b><br>(0.24,0.5<br>8) | <b>*0.39</b><br>(0.23,0.6<br>4) | <b>*0.41</b><br>(0.25,0.6<br>6) | <b>*0.44</b><br>(0.30,0.6<br>1) | <b>*0.45</b><br>(0.30,0.6<br>8) | 0.39<br>(0.09,1.6<br>2) | <b>*0.48</b><br>(0.27,0.8<br>6) | <b>*0.49</b><br>(0.26,0.9<br>2) | <b>*0.52</b><br>(0.35,0.7<br>7) | 0.63<br>(0.27,1.4<br>6)         | 0.67<br>(0.22,2.0<br>4) | <b>*0.65</b><br>(0.42,0.9<br>9) | 0.66<br>(0.37,1.1<br>5)         | 0.74<br>(0.10,5.6<br>9) | 0.68<br>(0.41,1.1<br>4)         | 0.79<br>(0.52,1.2<br>0)         | 0.81<br>(0.59,1.1<br>1)         | 0.84<br>(0.54,1.3<br>1)         | 1.03<br>(0.63,1.6<br>7) | MHR                     |                         |                         |                                 |  |  |  |  |
| <b>*0.12</b><br>(0.02,0.7<br>4) | 0.07<br>(0.00,1.7<br>6) | <b>*0.25</b><br>(0.13,0.4<br>9) | <b>*0.27</b><br>(0.11,0.6<br>5) | 0.12<br>(0.00,3.0<br>2) | <b>*0.33</b><br>(0.21,0.5<br>2) | <b>*0.35</b><br>(0.18,0.6<br>8) | <b>*0.37</b><br>(0.22,0.6<br>2) | <b>*0.40</b><br>(0.27,0.5<br>9) | <b>*0.41</b><br>(0.26,0.6<br>3) | 0.35<br>(0.08,1.4<br>8) | <b>*0.43</b><br>(0.24,0.8<br>0) | <b>*0.44</b><br>(0.23,0.8<br>5) | <b>*0.47</b><br>(0.34,0.6<br>6) | 0.57<br>(0.24,1.3<br>6)         | 0.61<br>(0.20,1.8<br>8) | <b>*0.58</b><br>(0.37,0.9<br>3) | 0.59<br>(0.33,1.0<br>8)         | 0.67<br>(0.09,5.1<br>3) | 0.62<br>(0.36,1.0<br>7)         | 0.71<br>(0.41,1.2<br>3)         | 0.73<br>(0.44,1.2<br>1)         | 0.76<br>(0.42,1.3<br>8)         | 0.93<br>(0.55,1.5<br>7) | 0.91<br>(0.54,1.5<br>1) | MED                     |                         |                                 |  |  |  |  |
| <b>*0.06</b><br>(0.01,0.6<br>7) | 0.04<br>(0.00,1.3<br>1) | <b>*0.13</b><br>(0.03,0.7<br>0) | <b>*0.14</b><br>(0.02,0.8<br>1) | 0.07<br>(0.00,2.2<br>5) | <b>*0.18</b><br>(0.04,0.8<br>5) | <b>*0.19</b><br>(0.04,0.9<br>5) | <b>*0.20</b><br>(0.04,0.9<br>6) | <b>*0.21</b><br>(0.05,0.9<br>9) | 0.22<br>(0.05,1.0<br>3)         | 0.19<br>(0.02,1.4<br>9) | 0.23<br>(0.05,1.1<br>6)         | 0.23<br>(0.05,1.2<br>0)         | 0.25<br>(0.05,1.1<br>9)         | 0.30<br>(0.05,1.7<br>1)         | 0.32<br>(0.05,2.1<br>0) | 0.31<br>(0.06,1.4<br>9)         | 0.32<br>(0.06,1.5<br>8)         | 0.36<br>(0.03,4.5<br>1) | 0.33<br>(0.07,1.6<br>1)         | 0.38<br>(0.08,1.8<br>3)         | 0.39<br>(0.08,1.8<br>8)         | 0.41<br>(0.08,2.0<br>3)         | 0.49<br>(0.10,2.4<br>1) | 0.48<br>(0.10,2.3<br>4) | 0.53<br>(0.11,2.6<br>1) | SHR                     |                                 |  |  |  |  |
| <b>*0.07</b><br>(0.01,0.4<br>9) | 0.04<br>(0.00,1.1<br>2) | <b>*0.15</b><br>(0.06,0.3<br>9) | <b>*0.16</b><br>(0.05,0.4<br>7) | 0.07<br>(0.00,1.9<br>4) | <b>*0.20</b><br>(0.09,0.4<br>4) | <b>*0.21</b><br>(0.09,0.5<br>2) | <b>*0.22</b><br>(0.10,0.5<br>0) | <b>*0.24</b><br>(0.12,0.4<br>9) | <b>*0.25</b><br>(0.12,0.5<br>2) | 0.21<br>(0.04,1.0<br>1) | <b>*0.26</b><br>(0.11,0.6<br>2) | <b>*0.27</b><br>(0.11,0.6<br>5) | <b>*0.28</b><br>(0.13,0.6<br>0) | <b>*0.34</b><br>(0.12,0.9<br>9) | 0.37<br>(0.10,1.3<br>2) | <b>*0.35</b><br>(0.16,0.7<br>6) | <b>*0.36</b><br>(0.16,0.7<br>8) | 0.41<br>(0.05,3.4<br>2) | <b>*0.37</b><br>(0.19,0.7<br>3) | <b>*0.43</b><br>(0.19,0.9<br>7) | <b>*0.44</b><br>(0.20,0.9<br>7) | 0.46<br>(0.20,1.0<br>8)         | 0.56<br>(0.25,1.2<br>5) | 0.55<br>(0.25,1.2<br>1) | 0.60<br>(0.27,1.3<br>6) | 1.13<br>(0.21,6.2<br>2) | SHG                             |  |  |  |  |

Pairwise (upper-right portion) and network (lower-left portion) meta-analysis results are presented as estimated effect sizes for the outcome of drop-out rate in patients with tinnitus. Interventions are reported in order of mean ranking of acceptability, and outcomes are expressed as odds ratio (OR) (95% confidence intervals). For the pairwise meta-analyses, OR of less than 1 indicate that the treatment specified in the row had better acceptability than that specified in the column. For the network meta-analysis (NMA), OR of less than 1 indicate that the treatment specified in the column had better acceptability than that specified in the row. Bold results marked with \* indicate statistical significance.





|                                 |                                 |                                 |                                 |                                 |                                 |                                 |                                 |                                 |                                 |                                 |                                 |                                 |                                 |                                 |                                 |                                 |                                 |                         |                                 |                                 |                                 |                                 |                                 |     |  |  |  |  |  |  |  |  |                         |  |
|---------------------------------|---------------------------------|---------------------------------|---------------------------------|---------------------------------|---------------------------------|---------------------------------|---------------------------------|---------------------------------|---------------------------------|---------------------------------|---------------------------------|---------------------------------|---------------------------------|---------------------------------|---------------------------------|---------------------------------|---------------------------------|-------------------------|---------------------------------|---------------------------------|---------------------------------|---------------------------------|---------------------------------|-----|--|--|--|--|--|--|--|--|-------------------------|--|
| <b>*0.47</b><br>(0.29,0.7<br>7) | <b>*0.54</b><br>(0.34,0.8<br>4) | <b>*0.56</b><br>(0.41,0.7<br>7) | <b>*0.57</b><br>(0.40,0.8<br>3) | 0.67<br>(0.38,1.1<br>7)         | <b>*0.67</b><br>(0.47,0.9<br>6) | 0.70<br>(0.48,1.0<br>1)         | 0.72<br>(0.48,1.0<br>8)         | 0.73<br>(0.29,1.8<br>4)         | 0.64<br>(0.12,3.3<br>6)         | 0.77<br>(0.52,1.1<br>3)         | 0.88<br>(0.26,3.0<br>2)         | 0.86<br>(0.55,1.3<br>5)         | 0.87<br>(0.59,1.2<br>8)         | 0.98<br>(0.38,2.5<br>1)         | 0.96<br>(0.67,1.3<br>9)         | SMG                             |                                 |                         |                                 |                                 |                                 |                                 |                                 |     |  |  |  |  |  |  |  |  | 0.56<br>(0.29,1.0<br>9) |  |
| 0.38<br>(0.12,1.2<br>2)         | 0.44<br>(0.14,1.3<br>7)         | 0.46<br>(0.15,1.3<br>7)         | 0.47<br>(0.15,1.4<br>2)         | 0.54<br>(0.16,1.7<br>8)         | 0.55<br>(0.17,1.7<br>2)         | 0.57<br>(0.19,1.7<br>3)         | 0.59<br>(0.19,1.8<br>1)         | 0.59<br>(0.15,2.4<br>0)         | 0.52<br>(0.07,3.7<br>1)         | 0.63<br>(0.20,1.9<br>2)         | 0.72<br>(0.14,3.6<br>2)         | 0.70<br>(0.22,2.2<br>0)         | 0.71<br>(0.23,2.1<br>7)         | 0.79<br>(0.19,3.2<br>6)         | 0.78<br>(0.26,2.3<br>8)         | 0.81<br>(0.26,2.5<br>4)         | MLT                             |                         |                                 |                                 |                                 |                                 |                                 |     |  |  |  |  |  |  |  |  |                         |  |
| 0.35<br>(0.11,1.1<br>6)         | 0.40<br>(0.12,1.3<br>0)         | 0.42<br>(0.13,1.3<br>0)         | 0.43<br>(0.14,1.3<br>3)         | 0.49<br>(0.14,1.6<br>9)         | 0.50<br>(0.15,1.6<br>3)         | 0.52<br>(0.16,1.6<br>5)         | 0.54<br>(0.17,1.7<br>1)         | 0.54<br>(0.13,2.2<br>7)         | 0.47<br>(0.06,3.4<br>6)         | 0.57<br>(0.18,1.8<br>3)         | 0.66<br>(0.18,2.3<br>7)         | 0.64<br>(0.20,2.0<br>9)         | 0.65<br>(0.20,2.0<br>7)         | 0.73<br>(0.17,3.0<br>8)         | 0.71<br>(0.23,2.2<br>2)         | 0.74<br>(0.23,2.4<br>1)         | 0.91<br>(0.19,4.4<br>2)         | RMMH                    |                                 | 1.22<br>(0.35,4.2<br>7)         |                                 |                                 |                                 |     |  |  |  |  |  |  |  |  |                         |  |
| <b>*0.37</b><br>(0.20,0.6<br>8) | <b>*0.42</b><br>(0.23,0.7<br>5) | <b>*0.44</b><br>(0.27,0.7<br>1) | <b>*0.45</b><br>(0.27,0.7<br>4) | 0.52<br>(0.27,1.0<br>2)         | <b>*0.52</b><br>(0.29,0.9<br>4) | <b>*0.55</b><br>(0.32,0.9<br>2) | <b>*0.57</b><br>(0.34,0.9<br>5) | 0.57<br>(0.21,1.5<br>4)         | 0.50<br>(0.09,2.7<br>3)         | 0.60<br>(0.35,1.0<br>3)         | 0.69<br>(0.21,2.2<br>4)         | 0.67<br>(0.38,1.2<br>0)         | 0.68<br>(0.39,1.1<br>7)         | 0.76<br>(0.28,2.1<br>0)         | 0.75<br>(0.48,1.1<br>7)         | 0.78<br>(0.44,1.3<br>8)         | 0.96<br>(0.29,3.1<br>7)         | 1.05<br>(0.34,3.2<br>3) | DMMH                            |                                 |                                 |                                 |                                 |     |  |  |  |  |  |  |  |  |                         |  |
| <b>*0.34</b><br>(0.20,0.5<br>9) | <b>*0.39</b><br>(0.23,0.6<br>5) | <b>*0.41</b><br>(0.28,0.6<br>0) | <b>*0.42</b><br>(0.27,0.6<br>5) | <b>*0.48</b><br>(0.26,0.8<br>9) | <b>*0.49</b><br>(0.29,0.8<br>2) | <b>*0.51</b><br>(0.33,0.7<br>9) | <b>*0.53</b><br>(0.33,0.8<br>4) | 0.53<br>(0.20,1.3<br>8)         | 0.46<br>(0.09,2.4<br>9)         | <b>*0.56</b><br>(0.37,0.8<br>4) | 0.64<br>(0.18,2.2<br>5)         | 0.63<br>(0.38,1.0<br>4)         | 0.63<br>(0.40,1.0<br>8)         | 0.71<br>(0.27,1.8<br>8)         | 0.70<br>(0.45,1.0<br>8)         | 0.73<br>(0.44,1.2<br>0)         | 0.89<br>(0.28,2.8<br>6)         | 0.98<br>(0.29,3.2<br>5) | 0.93<br>(0.50,1.7<br>2)         | MHG                             |                                 |                                 |                                 |     |  |  |  |  |  |  |  |  |                         |  |
| <b>*0.33</b><br>(0.22,0.5<br>1) | <b>*0.38</b><br>(0.25,0.5<br>8) | <b>*0.40</b><br>(0.30,0.5<br>2) | <b>*0.41</b><br>(0.29,0.5<br>7) | <b>*0.47</b><br>(0.27,0.8<br>1) | <b>*0.48</b><br>(0.31,0.7<br>3) | <b>*0.49</b><br>(0.35,0.6<br>9) | <b>*0.51</b><br>(0.35,0.7<br>4) | 0.52<br>(0.21,1.2<br>9)         | 0.45<br>(0.09,2.3<br>7)         | <b>*0.54</b><br>(0.38,0.7<br>7) | 0.63<br>(0.18,2.1<br>2)         | <b>*0.61</b><br>(0.43,0.8<br>6) | <b>*0.62</b><br>(0.48,0.7<br>8) | 0.69<br>(0.27,1.7<br>6)         | <b>*0.68</b><br>(0.49,0.9<br>5) | 0.71<br>(0.47,1.0<br>6)         | 0.87<br>(0.28,2.6<br>9)         | 0.95<br>(0.30,3.0<br>6) | 0.91<br>(0.52,1.5<br>7)         | 0.97<br>(0.61,1.5<br>6)         | MHR                             |                                 | 0.89<br>(0.63,1.2<br>4)         |     |  |  |  |  |  |  |  |  |                         |  |
| <b>*0.32</b><br>(0.19,0.5<br>1) | <b>*0.36</b><br>(0.22,0.5<br>7) | <b>*0.38</b><br>(0.27,0.5<br>2) | <b>*0.38</b><br>(0.26,0.5<br>6) | <b>*0.45</b><br>(0.25,0.7<br>9) | <b>*0.45</b><br>(0.28,0.7<br>2) | <b>*0.47</b><br>(0.32,0.6<br>9) | <b>*0.48</b><br>(0.32,0.7<br>3) | 0.49<br>(0.19,1.2<br>4)         | 0.43<br>(0.08,2.2<br>6)         | <b>*0.51</b><br>(0.34,0.7<br>7) | 0.59<br>(0.17,2.0<br>3)         | <b>*0.58</b><br>(0.39,0.8<br>6) | <b>*0.58</b><br>(0.42,0.8<br>0) | 0.65<br>(0.25,1.6<br>9)         | <b>*0.64</b><br>(0.44,0.9<br>4) | 0.67<br>(0.43,1.0<br>4)         | 0.82<br>(0.26,2.5<br>8)         | 0.90<br>(0.28,2.9<br>4) | 0.86<br>(0.48,1.5<br>3)         | 0.92<br>(0.55,1.5<br>3)         | 0.94<br>(0.68,1.3<br>1)         | MEPR                            |                                 |     |  |  |  |  |  |  |  |  |                         |  |
| <b>*0.30</b><br>(0.18,0.4<br>8) | <b>*0.34</b><br>(0.22,0.5<br>3) | <b>*0.35</b><br>(0.26,0.4<br>8) | <b>*0.36</b><br>(0.25,0.5<br>2) | <b>*0.42</b><br>(0.24,0.7<br>3) | <b>*0.42</b><br>(0.27,0.6<br>6) | <b>*0.44</b><br>(0.31,0.6<br>3) | <b>*0.46</b><br>(0.32,0.6<br>5) | 0.46<br>(0.18,1.1<br>5)         | 0.40<br>(0.08,2.1<br>1)         | <b>*0.48</b><br>(0.33,0.7<br>1) | 0.56<br>(0.17,1.8<br>7)         | <b>*0.54</b><br>(0.35,0.8<br>4) | <b>*0.55</b><br>(0.37,0.8<br>0) | 0.61<br>(0.24,1.5<br>8)         | <b>*0.61</b><br>(0.48,0.7<br>6) | <b>*0.63</b><br>(0.41,0.9<br>7) | 0.77<br>(0.25,2.4<br>1)         | 0.85<br>(0.27,2.7<br>0) | 0.81<br>(0.49,1.3<br>3)         | 0.86<br>(0.53,1.4<br>1)         | 0.89<br>(0.60,1.3<br>2)         | 0.94<br>(0.61,1.4<br>6)         | MED                             |     |  |  |  |  |  |  |  |  |                         |  |
| <b>*0.27</b><br>(0.12,0.5<br>8) | <b>*0.30</b><br>(0.14,0.6<br>4) | <b>*0.32</b><br>(0.16,0.6<br>2) | <b>*0.32</b><br>(0.16,0.6<br>6) | <b>*0.38</b><br>(0.17,0.8<br>6) | <b>*0.38</b><br>(0.18,0.7<br>8) | <b>*0.40</b><br>(0.20,0.8<br>0) | <b>*0.41</b><br>(0.20,0.8<br>4) | 0.41<br>(0.14,1.2<br>4)         | 0.36<br>(0.06,2.1<br>1)         | <b>*0.43</b><br>(0.21,0.8<br>9) | 0.50<br>(0.13,1.9<br>6)         | 0.49<br>(0.23,1.0<br>3)         | 0.49<br>(0.24,1.0<br>1)         | 0.55<br>(0.18,1.6<br>9)         | 0.54<br>(0.27,1.1<br>0)         | 0.57<br>(0.29,1.0<br>9)         | 0.70<br>(0.19,2.5<br>2)         | 0.76<br>(0.20,2.8<br>5) | 0.72<br>(0.32,1.6<br>6)         | 0.78<br>(0.36,1.7<br>0)         | 0.80<br>(0.39,1.6<br>5)         | 0.85<br>(0.40,1.7<br>9)         | 0.90<br>(0.43,1.8<br>8)         | SHG |  |  |  |  |  |  |  |  |                         |  |
| <b>*0.06</b><br>(0.01,0.2<br>6) | <b>*0.06</b><br>(0.01,0.3<br>0) | <b>*0.07</b><br>(0.01,0.3<br>0) | <b>*0.07</b><br>(0.01,0.3<br>1) | <b>*0.08</b><br>(0.02,0.3<br>8) | <b>*0.08</b><br>(0.02,0.3<br>7) | <b>*0.08</b><br>(0.02,0.3<br>8) | <b>*0.09</b><br>(0.02,0.4<br>0) | <b>*0.09</b><br>(0.02,0.4<br>9) | <b>*0.08</b><br>(0.01,0.7<br>0) | <b>*0.09</b><br>(0.02,0.4<br>2) | <b>*0.10</b><br>(0.02,0.7<br>1) | <b>*0.10</b><br>(0.02,0.4<br>8) | <b>*0.10</b><br>(0.02,0.4<br>7) | <b>*0.12</b><br>(0.02,0.6<br>7) | <b>*0.11</b><br>(0.02,0.5<br>2) | <b>*0.12</b><br>(0.03,0.5<br>5) | <b>*0.15</b><br>(0.02,0.9<br>4) | 0.16<br>(0.02,1.0<br>5) | <b>*0.15</b><br>(0.03,0.7<br>4) | <b>*0.16</b><br>(0.03,0.7<br>7) | <b>*0.17</b><br>(0.04,0.7<br>7) | <b>*0.19</b><br>(0.04,0.8<br>3) | <b>*0.19</b><br>(0.04,0.8<br>8) | SHR |  |  |  |  |  |  |  |  | 0.21<br>(0.04,1.0<br>9) |  |

Pairwise (upper-right portion) and network (lower-left portion) meta-analyses results are presented as estimated effect sizes for the outcomes of rates of any adverse events reported in patients with tinnitus. Interventions are reported in the order of the mean ranking of tolerability, and outcomes are expressed as odds ratio (OR) (95% confidence intervals). For the pairwise meta-analyses, OR of less than 1 indicate that the treatment specified in the row had better tolerability than that specified in the column. For the network meta-analysis (NMA), OR of less than 1 indicate that the treatment specified in the column had better tolerability than that specified in the row. Bold results marked with \* indicate statistical significance.

Abbreviation: CI: confidence interval; DMMH: medium-term high dose memantine plus high dose donepezil; EHM: extreme-long-term high dose memantine; EMG: extreme-long-term medium dose galantamine; ES: effect size; GMMH: medium-term high dose memantine plus low dose galantamine; LHR: long-term high dose rivastigmine; LLT: long-term low dose melatonin; MA: meta-analysis; MD: mean difference; MED: medium-term extreme high dose donepezil; MEM: medium-term extreme high dose memantine; MEPR: medium-term extreme high dose rivastigmine patch; MHD: medium-term high dose donepezil; MHG: medium-term high dose galantamine; MHM: medium-term high dose memantine; MHPR: medium-term high dose rivastigmine patch; MHR: medium-term high dose rivastigmine; MLPR: medium-term low dose rivastigmine patch; MLR: medium-term low dose rivastigmine; MLT: medium-term low dose melatonin; MMD: medium-term donepezil medium dose; MMG: medium-term medium dose galantamine; MMSE: mini-mental status examination;

NMA: network meta-analysis; OR: odds ratio; Pla: Placebo; PRISMA: preferred reporting items for systematic reviews and meta-analyses; RCT: randomized controlled trial; RMMH: medium-term high dose memantine plus medium dose rivastigmine; SHD: short-term high dose donepezil; SHG: short-term high dose galantamine; SHM: short-term high dose memantine; SHR: short-term high dose rivastigmine; SHT: short-term high dose melatonin; SLG: short-term low dose galantamine; SLT: short-term low dose melatonin; SMD: short-term medium dose donepezil; SMG: short-term medium dose galantamine; SMT: short-term medium dose melatonin; StMD: standardized mean difference; SUCRA: surface under the cumulative ranking curve

**eTable 8: Inconsistency of different intervention: design-by-treatment and loop inconsistency**

| Inconsistency                     | chi2  | Prob>chi2 |
|-----------------------------------|-------|-----------|
| Changes of cognition              |       |           |
| design-by-treatment               | 6.69  | 0.3504    |
| loop                              | 1.50  | 0.4721    |
| Changes of quality of life        |       |           |
| design-by-treatment               | 8.44  | 0.4907    |
| loop                              | 0.71  | 0.9499    |
| Changes of behavioral disturbance |       |           |
| design-by-treatment               | 0.36  | 0.9964    |
| loop                              | 0.12  | 0.9893    |
| Drop-out rate                     |       |           |
| design-by-treatment               | 13.32 | 0.3460    |
| loop                              | 3.23  | 0.5202    |
| Rate of any adverse event         |       |           |
| design-by-treatment               | 20.87 | 0.0220    |
| loop                              | 0.84  | 0.8408    |

**eTable 9: Inconsistency of different intervention: side-splitting inconsistency**

changes of cognition

| Side  | symmetric |          | nosymmetric |          | Treatments used |      |
|-------|-----------|----------|-------------|----------|-----------------|------|
|       | P>z       | tau      | P>z         | tau      |                 |      |
| A B   | .         | .        | .           | .        | A (reference):  | Pla  |
| A C * | 0.54      | 0.171287 | .           | .        | B:              | SLT  |
| A D   | .         | .        | .           | .        | C:              | SHT  |
| A E   | .         | .        | .           | .        | D:              | MLT  |
| A F * | 0.546     | 0.184451 | .           | .        | E:              | SHM  |
| A G   | .         | .        | .           | .        | F:              | MLR  |
| A I   | .         | .        | .           | .        | G:              | EMG  |
| A J   | .         | .        | .           | .        | H:              | MED  |
| A L   | .         | .        | .           | .        | I:              | EHM  |
| A M   | .         | .        | .           | .        | J:              | SHD  |
| A N   | 0.217     | 0.159703 | 0.217       | 0.159703 | K:              | GMMH |
| A O * | 0.217     | 0.159703 | 0.217       | 0.159703 | L:              | MMG  |
| A P * | 0.451     | 0.18414  | .           | .        | M:              | LHR  |
| A Q * | 0.64      | 0.193659 | 0.858       | 0.204768 | N:              | MHM  |
| A R * | 0.03      | 8.89E-08 | .           | .        | O:              | MHD  |
| A S * | 0.182     | 0.135242 | 0.858       | 0.20478  | P:              | MMD  |
| A U * | 0.188     | 0.114576 | .           | .        | Q:              | MHPR |

|      |       |          |       |          |    |      |
|------|-------|----------|-------|----------|----|------|
| AV   | .     | .        | .     | .        | R: | MLPR |
| BC * | 0.54  | 0.171297 | .     | .        | S: | MHR  |
| FS * | 0.546 | 0.184452 | 0.546 | 0.184452 | T: | RMMH |
| HO * | 0.999 | 0.168423 | 0.999 | 0.168424 | U: | MEPR |
| KN * | 0.999 | 0.168423 | 0.999 | 0.168424 | V: | SMD  |
| KT   | .     | .        | .     | .        | W: | DMMH |
| KW   | .     | .        | .     | .        |    |      |
| NO   | 0.217 | 0.159703 | 0.217 | 0.159703 |    |      |
| NT * | 0.999 | 0.168424 | .     | .        |    |      |
| NW * | 0.999 | 0.168424 | .     | .        |    |      |
| OP * | 0.451 | 0.184138 | .     | .        |    |      |
| QR * | 0.03  | 3.19E-06 | .     | .        |    |      |
| QS * | 0.06  | 2.53E-05 | 0.546 | 0.184452 |    |      |
| QU * | 0.11  | 0.097626 | .     | .        |    |      |
| SU * | 0.764 | 0.20209  | .     | .        |    |      |
| TW   | .     | .        | .     | .        |    |      |

changes of quality of life

| Side | symmetric |     | nosymmetric |     | Treatments used |     |
|------|-----------|-----|-------------|-----|-----------------|-----|
|      | P>z       | tau | P>z         | tau |                 |     |
| AB   | .         | .   | .           | .   | A (reference):  | Pla |

---

|      |       |          |       |          |    |      |
|------|-------|----------|-------|----------|----|------|
| AC * | 0.004 | 0.17792  | .     | .        | B: | SLT  |
| AD   | .     | .        | .     | .        | C: | SHT  |
| AE   | .     | .        | .     | .        | D: | MLT  |
| AF * | 0.978 | 0.20592  | .     | .        | E: | MEM  |
| AH   | .     | .        | .     | .        | F: | MLR  |
| AI   | .     | .        | .     | .        | G: | MED  |
| AJ   | .     | .        | .     | .        | H: | EHM  |
| AK * | 0.817 | 0.204964 | .     | .        | I: | SLG  |
| AL   | .     | .        | .     | .        | J: | SMG  |
| AM   | .     | .        | .     | .        | K: | MHG  |
| AN   | 0.364 | 0.195847 | 0.364 | 0.195847 | L: | MMG  |
| AO * | 0.364 | 0.195847 | 0.364 | 0.195847 | M: | LHR  |
| AP * | 0.561 | 0.200465 | .     | .        | N: | MHM  |
| AQ * | 0.971 | 0.206068 | 0.944 | 0.206334 | O: | MHD  |
| AR   | 0.921 | 0.206444 | 0.897 | 0.206491 | P: | MMD  |
| AS * | 0.879 | 0.205842 | 0.826 | 0.205423 | Q: | MHPR |
| AT   | .     | .        | .     | .        | R: | MLPR |
| AU * | 0.957 | 0.206376 | .     | .        | S: | MHR  |
| BC * | 0.004 | 0.17792  | .     | .        | T: | SHR  |
| FS * | 0.978 | 0.20592  | 0.978 | 0.20592  | U: | MEPR |
| GO * | 0.993 | 0.194133 | 0.993 | 0.194133 | V: | GMMH |
| IJ   | .     | .        | .     | .        | W: | DMMH |
| KL * | 0.817 | 0.204964 | 0.817 | 0.204964 | X: | RMMH |

---

|       |       |          |       |          |
|-------|-------|----------|-------|----------|
| N O   | 0.443 | 0.197537 | 0.443 | 0.197537 |
| N V * | 0.739 | 0.19988  | .     | .        |
| N W * | 0.739 | 0.19988  | 0.739 | 0.19988  |
| N X * | 0.739 | 0.19988  | .     | .        |
| O P * | 0.561 | 0.200465 | .     | .        |
| O W   | 0.739 | 0.19988  | 0.739 | 0.19988  |
| Q R * | 0.973 | 0.206398 | .     | .        |
| Q S * | 0.996 | 0.20607  | 0.978 | 0.20592  |
| Q U * | 0.877 | 0.206135 | .     | .        |
| S U * | 0.832 | 0.205662 | .     | .        |
| V W * | 0.739 | 0.19988  | 0.739 | 0.19988  |
| V X   | .     | .        | .     | .        |
| W X * | 0.739 | 0.19988  | .     | .        |

changes of behavioral disturbance

| Side | symmetric |     | nosymmetric |     | Treatments used |     |
|------|-----------|-----|-------------|-----|-----------------|-----|
|      | P>z       | tau | P>z         | tau |                 |     |
| A B  | .         | .   | .           | .   | A (reference):  | Pla |
| A C  | .         | .   | .           | .   | B:              | SLT |
| A D  | .         | .   | .           | .   | C:              | SHT |
| A E  | .         | .   | .           | .   | D:              | MEM |



---

|     |       |          |       |          |    |      |
|-----|-------|----------|-------|----------|----|------|
| AF  | .     | .        | .     | .        | E: | SHM  |
| AG  | .     | .        | .     | .        | F: | EHM  |
| AI  | .     | .        | .     | .        | G: | SHD  |
| AJ  | .     | .        | .     | .        | H: | DMMH |
| AK* | 0.742 | 0.141315 | .     | .        | I: | SLG  |
| AL  | .     | .        | .     | .        | J: | SMG  |
| AM  | .     | .        | .     | .        | K: | MEPR |
| AN  | 0.999 | 0.13734  | 0.999 | 0.13734  | L: | MMG  |
| AO* | 0.999 | 0.137339 | 0.999 | 0.137339 | M: | SHR  |
| AP* | 0.527 | 0.132967 | .     | .        | N: | MHM  |
| AQ* | 0.953 | 0.14274  | 0.953 | 0.14274  | O: | MHD  |
| AR  | 0.681 | 0.140629 | 0.748 | 0.141756 | P: | MMD  |
| AS* | 0.711 | 0.140413 | 0.801 | 0.141248 | Q: | MHPR |
| BC  | .     | .        | .     | .        | R: | MLPR |
| HO* | 1     | 0.127712 | 1     | 0.127712 | S: | MHR  |
| IJ  | .     | .        | .     | .        |    |      |
| KQ* | 0.939 | 0.14266  | 0.939 | 0.142659 |    |      |
| KS* | 0.801 | 0.141248 | 0.801 | 0.141248 |    |      |
| NO  | 0.999 | 0.13734  | 0.999 | 0.137339 |    |      |
| OP* | 0.527 | 0.132968 | .     | .        |    |      |
| QR* | 0.742 | 0.141316 | .     | .        |    |      |
| QS* | 0.742 | 0.141316 | .     | .        |    |      |

---

drop-out rate

| Side  | symmetric |          | nosymmetric |          | Treatments used |      |
|-------|-----------|----------|-------------|----------|-----------------|------|
|       | P>z       | tau      | P>z         | tau      |                 |      |
| AA AB | .         | .        | .           | .        | AA (reference): | Pla  |
| AA AC | 0.421     | 0.148016 | .           | .        | AB:             | SLT  |
| AA AD | .         | .        | .           | .        | AC:             | SHT  |
| AA AE | .         | .        | .           | .        | AD:             | MLT  |
| AA AF | 0.486     | 0.154004 | .           | .        | AE:             | MEM  |
| AA AG | .         | .        | .           | .        | AF:             | SHG  |
| AA AH | 0.09      | 0.117708 | .           | .        | AG:             | SHM  |
| AA AI | 0.866     | 0.15756  | .           | .        | AH:             | MLR  |
| AA AJ | .         | .        | .           | .        | AI:             | SLG  |
| AA AK | 0.156     | 0.137482 | .           | .        | AJ:             | SMG  |
| AA AL | .         | .        | .           | .        | AK:             | MHG  |
| AA AM | .         | .        | .           | .        | AL:             | MMG  |
| AA AN | 0.154     | 0.122623 | 0.154       | 0.122623 | AM:             | EMG  |
| AA AO | 0.282     | 0.131738 | 0.154       | 0.122622 | AN:             | MHM  |
| AA AP | 0.084     | 0.133255 | .           | .        | AO:             | MHD  |
| AA AQ | 0.35      | 0.152952 | 0.902       | 0.165202 | AP:             | MMD  |
| AA AR | 0.39      | 0.156284 | 0.983       | 0.166734 | AQ:             | MHPR |
| AA AS | 0.326     | 0.150152 | 0.883       | 0.163604 | AR:             | MLPR |

---

|       |       |          |       |          |     |      |
|-------|-------|----------|-------|----------|-----|------|
| AA AT | .     | .        | .     | .        | AS: | MHR  |
| AA AU | 0.968 | 0.16197  | .     | .        | AT: | SHR  |
| AA AV | .     | .        | .     | .        | AU: | MEPR |
| AA AZ | .     | .        | .     | .        | AV: | SMD  |
| AA BA | .     | .        | .     | .        | AW: | DMMH |
| AB AC | 0.421 | 0.148016 | .     | .        | AX: | RMMH |
| AF AJ | 0.486 | 0.154004 | 0.486 | 0.154003 | AY: | GMMH |
| AH AS | 0.09  | 0.117708 | 0.09  | 0.117707 | AZ: | SHD  |
| AI AJ | 0.866 | 0.15756  | 0.866 | 0.15756  | BA: | EHM  |
| AK AL | 0.156 | 0.137482 | 0.156 | 0.137482 | BB: | MED  |
| AN AO | 0.098 | 0.120552 | 0.098 | 0.120552 |     |      |
| AN AW | 0.321 | 0.148743 | 0.321 | 0.148743 |     |      |
| AN AX | 0.321 | 0.148742 | .     | .        |     |      |
| AN AY | 0.321 | 0.148743 | .     | .        |     |      |
| AO AP | 0.093 | 0.135922 | 0.574 | 0.156415 |     |      |
| AO AW | 0.321 | 0.148743 | 0.321 | 0.148743 |     |      |
| AO BB | 0.99  | 0.147801 | .     | .        |     |      |
| AQ AR | 0.13  | 0.127517 | .     | .        |     |      |
| AQ AS | 0.044 | 0.099812 | 0.09  | 0.117708 |     |      |
| AQ AU | 0.251 | 0.141945 | .     | .        |     |      |
| AS AU | 0.223 | 0.140457 | .     | .        |     |      |
| AW AX | 0.321 | 0.148743 | .     | .        |     |      |
| AW AY | 0.321 | 0.148743 | .     | .        |     |      |

---

---

AX AY

---

rate of any adverse event reported

| Side  | symmetric |          | nosymmetric |          | Treatments used |     |
|-------|-----------|----------|-------------|----------|-----------------|-----|
|       | P>z       | tau      | P>z         | tau      |                 |     |
| A B   | .         | .        | .           | .        | A (reference):  | Pla |
| A C   | .         | .        | .           | .        | B:              | SLT |
| A D   | .         | .        | .           | .        | C:              | SHT |
| A E   | .         | .        | .           | .        | D:              | MLT |
| A F * | 0.849     | 0.076541 | .           | .        | E:              | MEM |
| A G * | 0.057     | 1.21E-06 | .           | .        | F:              | SHG |
| A H   | .         | .        | .           | .        | G:              | MLR |
| A I * | 0.387     | 0.06915  | .           | .        | H:              | EMG |
| A J   | .         | .        | .           | .        | I:              | SLG |
| A K * | 0.015     | 2.60E-07 | .           | .        | J:              | SMG |
| A L   | .         | .        | .           | .        | K:              | MHG |
| A M   | .         | .        | .           | .        | L:              | MMG |
| A N   | 0.592     | 0.0621   | 0.592       | 0.0621   | M:              | LHR |
| A O   | 0.306     | 0.036676 | 0.592       | 0.062096 | N:              | MHM |
| A P * | 0.057     | 0.035501 | .           | .        | O:              | MHD |
| A Q * | 0.103     | 1.12E-06 | 0.432       | 0.068297 | P:              | MMD |

---

---

|     |       |          |       |          |    |      |
|-----|-------|----------|-------|----------|----|------|
| AR  | 0.272 | 0.021718 | 0.581 | 0.069833 | Q: | MHPR |
| AS* | 0.732 | 0.077726 | 0.619 | 0.083076 | R: | MLPR |
| AT  | .     | .        | .     | .        | S: | MHR  |
| AU* | 0.016 | 5.65E-06 | .     | .        | T: | SHR  |
| AZ  | .     | .        | .     | .        | U: | MEPR |
| BC  | .     | .        | .     | .        | V: | MED  |
| FJ* | 0.849 | 0.076543 | 0.849 | 0.076544 | W: | DMMH |
| GS* | 0.057 | 5.41E-06 | 0.057 | 1.68E-05 | X: | RMMH |
| IJ* | 0.387 | 0.06915  | 0.387 | 0.069149 | Y: | GMMH |
| KL* | 0.015 | 1.23E-06 | 0.015 | 4.25E-06 | Z: | EHM  |
| NW* | 0.592 | 0.062097 | 0.592 | 0.062102 |    |      |
| NX* | 0.592 | 0.062102 | .     | .        |    |      |
| NY* | 0.592 | 0.062097 | .     | .        |    |      |
| OP  | 0.017 | 1.12E-06 | 0.073 | 3.75E-05 |    |      |
| OV* | 0     | 0.058301 | .     | .        |    |      |
| OW  | 0.592 | 0.062092 | 0.592 | 0.0621   |    |      |
| QR* | 0.226 | 1.94E-05 | .     | .        |    |      |
| QS* | 0.77  | 0.082411 | 0.057 | 1.68E-05 |    |      |
| QU* | 0.159 | 0.00039  | .     | .        |    |      |
| SU* | 0.404 | 0.079998 | .     | .        |    |      |
| WX* | 0.592 | 0.062097 | .     | .        |    |      |
| WY* | 0.592 | 0.062097 | .     | .        |    |      |
| XY  | .     | .        | .     | .        |    |      |

---

**eTable 10: Estimated between-studies standard deviations of different outcome**

| Outcome                           | Estimated between-studies standard deviation |
|-----------------------------------|----------------------------------------------|
| Changes of cognition              | 0.1684                                       |
| Changes of quality of life        | 0.1941                                       |
| Changes of behavioral disturbance | 0.1277                                       |
| Drop-out rate                     | 0.1478                                       |
| Rate of any adverse event         | 0.0583                                       |

**eTable 11: Quality of evidence for primary outcome: changes of cognition**

| Comparisons | GRADE                                                                               |                                                                                                  |                                                                                                        |
|-------------|-------------------------------------------------------------------------------------|--------------------------------------------------------------------------------------------------|--------------------------------------------------------------------------------------------------------|
|             | Direct<br>Mean difference<br>(95% CI) and the<br>final rating of<br>direct evidence | Indirect<br>rating of indirect<br>evidence<br>(Standard error)<br>Co-efficiency<br>and the final | Network meta-analysis<br>overall quality of<br>evidence<br>Mean difference<br>(95% CI) and<br>very low |
| MLT vs MED  |                                                                                     |                                                                                                  | 0.14 (-1.10,1.37) ⊕○○○ very low                                                                        |
| MLT vs SHD  |                                                                                     |                                                                                                  | -0.02 (-1.72,1.68) ⊕○○○ very low                                                                       |
| MLT vs GMMH |                                                                                     |                                                                                                  | 0.16 (-1.68,2.01) ⊕○○○ very low                                                                        |
| MLT vs SHM  |                                                                                     |                                                                                                  | 0.08 (-2.21,2.38) ⊕○○○ very low                                                                        |
| MLT vs MHD  |                                                                                     |                                                                                                  | 0.44 (-0.58,1.45) ⊕○○○ very low                                                                        |
| MLT vs MMD  |                                                                                     |                                                                                                  | 0.43 (-0.81,1.66) ⊕○○○ very low                                                                        |
| MLT vs LHR  |                                                                                     |                                                                                                  | 0.48 (-0.58,1.55) ⊕○○○ very low                                                                        |
| MLT vs RMMH |                                                                                     |                                                                                                  | 0.57 (-1.41,2.56) ⊕○○○ very low                                                                        |
| MLT vs DMMH |                                                                                     |                                                                                                  | 0.61 (-1.24,2.47) ⊕○○○ very low                                                                        |
| MLT vs EMG  |                                                                                     |                                                                                                  | 0.75 (-0.35,1.85) ⊕○○○ very low                                                                        |
| MLT vs MHR  |                                                                                     |                                                                                                  | 0.77 (-0.29,1.82) ⊕○○○ very low                                                                        |
| MLT vs MEPR |                                                                                     |                                                                                                  | 0.76 (-0.37,1.89) ⊕○○○ very low                                                                        |
| MLT vs MHR  |                                                                                     |                                                                                                  | 0.82 (-0.25,1.88) ⊕○○○ very low                                                                        |
| MLT vs MHM  |                                                                                     |                                                                                                  | 0.98 (-0.18,2.14) ⊕○○○ very low                                                                        |
| MLT vs SLT  |                                                                                     |                                                                                                  | 1.35 (-0.04,2.74) ⊕○○○ very low                                                                        |
| MLT vs EHM  |                                                                                     |                                                                                                  | 1.37 (-0.00,2.75) ⊕○○○ very low                                                                        |
| MLT vs MLPR |                                                                                     |                                                                                                  | <b>*1.28 (0.15,2.41) ⊕⊕○ medium</b>                                                                    |

|             |                                      |                              |                                      |
|-------------|--------------------------------------|------------------------------|--------------------------------------|
| MLT vs SMD  |                                      |                              | 1.58 (-0.61,3.78) ⊕○○○ very low      |
| MLT vs Pla  | <b>*1.48 (0.54,2.43)</b> ⊕⊕⊕○ medium |                              | <b>*1.48 (0.51,2.46)</b> ⊕⊕⊕○ medium |
| MLT vs MMG  |                                      |                              | 2.18 (-0.40,4.77) ⊕○○○ very low      |
| MLT vs MLR  |                                      |                              | <b>*1.65 (0.45,2.86)</b> ⊕⊕⊕○ medium |
| MLT vs SHT  |                                      |                              | <b>*1.95 (0.40,3.51)</b> ⊕⊕⊕○ medium |
| MED vs SHD  |                                      |                              | -0.15 (-1.74,1.43) ⊕○○○ very low     |
| MED vs GMMH |                                      |                              | 0.03 (-1.71,1.76) ⊕○○○ very low      |
| MED vs SHM  |                                      |                              | -0.05 (-2.27,2.16) ⊕○○○ very low     |
| MED vs MHD  | 0.30 (-0.32,0.92) ⊕⊕○○ low           | 2.14 (2785.57) ⊕○○○ very low | 0.30 (-0.41,1.01) ⊕⊕⊕○ medium        |
| MED vs MMD  |                                      |                              | 0.29 (-0.75,1.33) ⊕○○○ very low      |
| MED vs LHR  |                                      |                              | 0.35 (-0.53,1.22) ⊕⊕○○ low           |
| MED vs RMMH |                                      |                              | 0.44 (-1.45,2.32) ⊕○○○ very low      |
| MED vs DMMH |                                      |                              | 0.48 (-1.27,2.22) ⊕○○○ very low      |
| MED vs EMG  |                                      |                              | 0.61 (-0.30,1.53) ⊕⊕○○ low           |
| MED vs MHPR |                                      |                              | 0.63 (-0.23,1.49) ⊕⊕○○ low           |
| MED vs MEPR |                                      |                              | 0.62 (-0.33,1.58) ⊕⊕○○ low           |
| MED vs MHR  |                                      |                              | 0.68 (-0.20,1.56) ⊕⊕○○ low           |
| MED vs MHM  |                                      |                              | 0.85 (-0.13,1.82) ⊕⊕○○ low           |
| MED vs SLT  |                                      |                              | 1.21 (-0.04,2.46) ⊕○○○ very low      |
| MED vs EHM  |                                      |                              | <b>*1.24 (0.00,2.47)</b> ⊕⊕⊕○ medium |
| MED vs MLPR |                                      |                              | <b>*1.14 (0.18,2.10)</b> ⊕⊕⊕○ medium |
| MED vs SMD  |                                      |                              | 1.45 (-0.67,3.56) ⊕○○○ very low      |
| MED vs Pla  |                                      |                              | <b>*1.35 (0.59,2.11)</b> ⊕⊕⊕○ medium |
| MED vs MMG  |                                      |                              | 2.05 (-0.46,4.56) ⊕○○○ very low      |
| MED vs MLR  |                                      |                              | <b>*1.52 (0.48,2.56)</b> ⊕⊕⊕○ medium |



|             |                                      |                                      |
|-------------|--------------------------------------|--------------------------------------|
| MED vs SHT  |                                      | <b>*1.81 (0.38,3.25)</b> ⊕⊕⊕○ medium |
| SHD vs GMMH |                                      | 0.18 (-1.92,2.28) ⊕○○○ very low      |
| SHD vs SHM  |                                      | 0.10 (-2.40,2.60) ⊕○○○ very low      |
| SHD vs MHD  |                                      | 0.45 (-0.97,1.87) ⊕○○○ very low      |
| SHD vs MMD  |                                      | 0.44 (-1.15,2.03) ⊕○○○ very low      |
| SHD vs LHR  |                                      | 0.50 (-0.96,1.96) ⊕○○○ very low      |
| SHD vs RMMH |                                      | 0.59 (-1.63,2.81) ⊕○○○ very low      |
| SHD vs DMMH |                                      | 0.63 (-1.48,2.73) ⊕○○○ very low      |
| SHD vs EMG  |                                      | 0.77 (-0.72,2.25) ⊕○○○ very low      |
| SHD vs MHPR |                                      | 0.78 (-0.67,2.23) ⊕○○○ very low      |
| SHD vs MEPR |                                      | 0.77 (-0.73,2.28) ⊕○○○ very low      |
| SHD vs MHR  |                                      | 0.83 (-0.62,2.29) ⊕○○○ very low      |
| SHD vs MHM  |                                      | 1.00 (-0.53,2.53) ⊕○○○ very low      |
| SHD vs SLT  |                                      | 1.36 (-0.35,3.08) ⊕○○○ very low      |
| SHD vs EHM  |                                      | 1.39 (-0.31,3.09) ⊕○○○ very low      |
| SHD vs MLPR |                                      | 1.30 (-0.21,2.80) ⊕○○○ very low      |
| SHD vs SMD  |                                      | 1.60 (-0.81,4.01) ⊕○○○ very low      |
| SHD vs Pla  | <b>*1.50 (0.15,2.85)</b> ⊕⊕⊕○ medium | <b>*1.50 (0.11,2.89)</b> ⊕⊕⊕○ medium |
| SHD vs MMG  |                                      | 2.20 (-0.57,4.97) ⊕○○○ very low      |
| SHD vs MLR  |                                      | <b>*1.67 (0.11,3.23)</b> ⊕⊕⊕○ medium |
| SHD vs SHT  |                                      | <b>*1.97 (0.12,3.81)</b> ⊕⊕⊕○ medium |
| GMMH vs SHM |                                      | -0.08 (-2.68,2.53) ⊕○○○ very low     |
| GMMH vs MHD |                                      | 0.27 (-1.31,1.86) ⊕○○○ very low      |
| GMMH vs MMD |                                      | 0.26 (-1.48,2.00) ⊕○○○ very low      |
| GMMH vs LHR |                                      | 0.32 (-1.31,1.95) ⊕○○○ very low      |

|              |                            |                              |                                 |
|--------------|----------------------------|------------------------------|---------------------------------|
| GMMH vs RMMH | 0.41 (-1.07,1.89) ⊕⊕○○ low |                              | 0.41 (-1.11,1.93) ⊕⊕○○ low      |
| GMMH vs DMMH | 0.45 (-0.85,1.75) ⊕⊕○○ low |                              | 0.45 (-0.89,1.79) ⊕⊕○○ low      |
| GMMH vs EMG  |                            |                              | 0.59 (-1.06,2.24) ⊕○○○ very low |
| GMMH vs MHPR |                            |                              | 0.60 (-1.02,2.22) ⊕○○○ very low |
| GMMH vs MEPR |                            |                              | 0.60 (-1.07,2.27) ⊕○○○ very low |
| GMMH vs MHR  |                            |                              | 0.66 (-0.97,2.28) ⊕○○○ very low |
| GMMH vs MHM  | 0.82 (-0.58,2.22) ⊕⊕○○ low | 0.65 (1605.92) ⊕○○○ very low | 0.82 (-0.62,2.26) ⊕⊕○○ low      |
| GMMH vs SLT  |                            |                              | 1.19 (-0.67,3.04) ⊕○○○ very low |
| GMMH vs EHM  |                            |                              | 1.21 (-0.64,3.06) ⊕○○○ very low |
| GMMH vs MLPR |                            |                              | 1.12 (-0.56,2.79) ⊕○○○ very low |
| GMMH vs SMD  |                            |                              | 1.42 (-1.10,3.94) ⊕○○○ very low |
| GMMH vs Pla  |                            |                              | 1.32 (-0.25,2.89) ⊕○○○ very low |
| GMMH vs MMG  |                            |                              | 2.02 (-0.84,4.88) ⊕○○○ very low |
| GMMH vs MLR  |                            |                              | 1.49 (-0.23,3.21) ⊕○○○ very low |
| GMMH vs SHT  |                            |                              | 1.79 (-0.19,3.77) ⊕○○○ very low |
| SHM vs MHD   |                            |                              | 0.35 (-1.74,2.45) ⊕○○○ very low |
| SHM vs MMD   |                            |                              | 0.34 (-1.87,2.56) ⊕○○○ very low |
| SHM vs LHR   |                            |                              | 0.40 (-1.72,2.52) ⊕○○○ very low |
| SHM vs RMMH  |                            |                              | 0.49 (-2.22,3.19) ⊕○○○ very low |
| SHM vs DMMH  |                            |                              | 0.53 (-2.08,3.14) ⊕○○○ very low |
| SHM vs EMG   |                            |                              | 0.67 (-1.47,2.81) ⊕○○○ very low |
| SHM vs MHPR  |                            |                              | 0.68 (-1.43,2.80) ⊕○○○ very low |
| SHM vs MEPR  |                            |                              | 0.67 (-1.48,2.83) ⊕○○○ very low |
| SHM vs MHR   |                            |                              | 0.73 (-1.39,2.86) ⊕○○○ very low |
| SHM vs MHM   |                            |                              | 0.90 (-1.27,3.07) ⊕○○○ very low |

|             |                                      |                       |                                      |
|-------------|--------------------------------------|-----------------------|--------------------------------------|
| SHM vs SLT  |                                      |                       | 1.26 (-1.04,3.57) ⊕○○○ very low      |
| SHM vs EHM  |                                      |                       | 1.29 (-1.00,3.58) ⊕○○○ very low      |
| SHM vs MLPR |                                      |                       | 1.20 (-0.96,3.35) ⊕○○○ very low      |
| SHM vs SMD  |                                      |                       | 1.50 (-1.36,4.36) ⊕○○○ very low      |
| SHM vs Pla  | 1.40 (-0.65,3.45) ⊕⊕○○ low           |                       | 1.40 (-0.68,3.48) ⊕⊕○○ low           |
| SHM vs MMG  |                                      |                       | 2.10 (-1.07,5.27) ⊕○○○ very low      |
| SHM vs MLR  |                                      |                       | 1.57 (-0.62,3.77) ⊕○○○ very low      |
| SHM vs SHT  |                                      |                       | 1.87 (-0.54,4.27) ⊕○○○ very low      |
| MHD vs MMD  | 0.15 (-0.65,0.95) ⊕⊕○○ low           | 0.56 (0.83) ⊕⊕○○ low  | -0.01 (-0.77,0.75) ⊕⊕⊕○ medium       |
| MHD vs LHR  |                                      |                       | 0.05 (-0.47,0.56) ⊕⊕○○ low           |
| MHD vs RMMH |                                      |                       | 0.14 (-1.61,1.89) ⊕○○○ very low      |
| MHD vs DMMH |                                      |                       | 0.18 (-1.42,1.77) ⊕○○○ very low      |
| MHD vs EMG  |                                      |                       | 0.31 (-0.27,0.90) ⊕⊕○○ low           |
| MHD vs MHRP |                                      |                       | 0.33 (-0.17,0.83) ⊕⊕○○ low           |
| MHD vs MEPR |                                      |                       | 0.32 (-0.32,0.97) ⊕⊕○○ low           |
| MHD vs MHR  |                                      |                       | 0.38 (-0.14,0.90) ⊕⊕○○ low           |
| MHD vs MMH  | -0.37 (-1.94,1.20) ⊕⊕○○ low          | 0.74 (0.38) ⊕⊕○○ low  | 0.55 (-0.13,1.22) ⊕⊕⊕○ medium        |
| MHD vs SLT  |                                      |                       | 0.91 (-0.13,1.95) ⊕○○○ very low      |
| MHD vs EHM  |                                      |                       | 0.94 (-0.08,1.95) ⊕○○○ very low      |
| MHD vs MLPR |                                      |                       | <b>*0.84 (0.19,1.49)</b> ⊕⊕⊕○ medium |
| MHD vs SMD  |                                      |                       | 1.15 (-0.84,3.14) ⊕○○○ very low      |
| MHD vs Pla  | <b>*1.08 (0.83,1.34)</b> ⊕⊕⊕○ medium | -0.03 (0.89) ⊕⊕○○ low | <b>*1.05 (0.76,1.33)</b> ⊕⊕⊕○ medium |
| MHD vs MMG  |                                      |                       | 1.75 (-0.66,4.16) ⊕○○○ very low      |
| MHD vs MLR  |                                      |                       | <b>*1.22 (0.46,1.98)</b> ⊕⊕⊕○ medium |
| MHD vs SHT  |                                      |                       | <b>*1.51 (0.27,2.76)</b> ⊕⊕⊕○ medium |

|             |                                      |                      |                                      |
|-------------|--------------------------------------|----------------------|--------------------------------------|
| MMD vs LHR  |                                      |                      | 0.06 (-0.82,0.93) ⊕⊕○○ low           |
| MMD vs RMMH |                                      |                      | 0.15 (-1.74,2.04) ⊕○○○ very low      |
| MMD vs DMMH |                                      |                      | 0.19 (-1.56,1.94) ⊕○○○ very low      |
| MMD vs EMG  |                                      |                      | 0.32 (-0.59,1.24) ⊕⊕○○ low           |
| MMD vs MHPR |                                      |                      | 0.34 (-0.52,1.20) ⊕⊕○○ low           |
| MMD vs MEPR |                                      |                      | 0.33 (-0.62,1.29) ⊕⊕○○ low           |
| MMD vs MHR  |                                      |                      | 0.39 (-0.49,1.27) ⊕⊕○○ low           |
| MMD vs MHM  |                                      |                      | 0.56 (-0.43,1.54) ⊕⊕○○ low           |
| MMD vs SLT  |                                      |                      | 0.92 (-0.33,2.18) ⊕○○○ very low      |
| MMD vs EHM  |                                      |                      | 0.95 (-0.29,2.18) ⊕○○○ very low      |
| MMD vs MLPR |                                      |                      | 0.85 (-0.10,1.81) ⊕⊕○○ low           |
| MMD vs SMD  |                                      |                      | 1.16 (-0.95,3.27) ⊕○○○ very low      |
| MMD vs Pla  | <b>*1.21 (0.42,2.00)</b> ⊕⊕⊕○ medium | 0.50 (0.84) ⊕⊕○○ low | <b>*1.06 (0.30,1.82)</b> ⊕⊕⊕○ medium |
| MMD vs MMG  |                                      |                      | 1.76 (-0.75,4.27) ⊕○○○ very low      |
| MMD vs MLR  |                                      |                      | <b>*1.23 (0.19,2.27)</b> ⊕⊕⊕○ medium |
| MMD vs SHT  |                                      |                      | <b>*1.53 (0.10,2.96)</b> ⊕⊕⊕○ medium |
| LHR vs RMMH |                                      |                      | 0.09 (-1.70,1.87) ⊕○○○ very low      |
| LHR vs DMMH |                                      |                      | 0.13 (-1.51,1.77) ⊕○○○ very low      |
| LHR vs EMG  |                                      |                      | 0.27 (-0.40,0.94) ⊕⊕○○ low           |
| LHR vs MHPR |                                      |                      | 0.28 (-0.31,0.87) ⊕⊕○○ low           |
| LHR vs MEPR |                                      |                      | 0.27 (-0.44,0.99) ⊕⊕○○ low           |
| LHR vs MHR  |                                      |                      | 0.33 (-0.28,0.95) ⊕⊕○○ low           |
| LHR vs MHM  |                                      |                      | 0.50 (-0.26,1.26) ⊕⊕○○ low           |
| LHR vs SLT  |                                      |                      | 0.86 (-0.22,1.95) ⊕○○○ very low      |
| LHR vs EHM  |                                      |                      | 0.89 (-0.17,1.95) ⊕○○○ very low      |

|              |                                      |                               |  |                                      |
|--------------|--------------------------------------|-------------------------------|--|--------------------------------------|
| LHR vs MLPR  |                                      |                               |  | <b>*0.80 (0.07,1.52)</b> ⊕⊕⊕○ medium |
| LHR vs SMD   |                                      |                               |  | 1.10 (-0.92,3.12) ⊕○○○ very low      |
| LHR vs Pla   | <b>*1.00 (0.72,1.28)</b> ⊕⊕⊕○ medium |                               |  | <b>*1.00 (0.57,1.43)</b> ⊕⊕⊕○ medium |
| LHR vs MMG   |                                      |                               |  | 1.70 (-0.73,4.13) ⊕○○○ very low      |
| LHR vs MLR   |                                      |                               |  | <b>*1.17 (0.34,2.00)</b> ⊕⊕⊕○ medium |
| LHR vs SHT   |                                      |                               |  | <b>*1.47 (0.18,2.75)</b> ⊕⊕○○ low    |
| RMMH vs DMMH | 0.04 (-1.45,1.53) ⊕⊕○○ low           |                               |  | 0.04 (-1.49,1.57) ⊕⊕○○ low           |
| RMMH vs EMG  |                                      |                               |  | 0.18 (-1.63,1.98) ⊕○○○ very low      |
| RMMH vs MHRP |                                      |                               |  | 0.19 (-1.58,1.97) ⊕○○○ very low      |
| RMMH vs MEPR |                                      |                               |  | 0.19 (-1.64,2.01) ⊕○○○ very low      |
| RMMH vs MHR  |                                      |                               |  | 0.25 (-1.54,2.03) ⊕○○○ very low      |
| RMMH vs MHM  | 0.41 (-1.17,1.99) ⊕⊕○○ low           | -1.34 (1437.04) ⊕○○○ very low |  | 0.41 (-1.20,2.02) ⊕⊕○○ low           |
| RMMH vs SLT  |                                      |                               |  | 0.78 (-1.22,2.77) ⊕○○○ very low      |
| RMMH vs EHM  |                                      |                               |  | 0.80 (-1.19,2.79) ⊕○○○ very low      |
| RMMH vs MLPR |                                      |                               |  | 0.71 (-1.12,2.53) ⊕○○○ very low      |
| RMMH vs SMD  |                                      |                               |  | 1.01 (-1.61,3.63) ⊕○○○ very low      |
| RMMH vs Pla  |                                      |                               |  | 0.91 (-0.82,2.64) ⊕○○○ very low      |
| RMMH vs MMG  |                                      |                               |  | 1.61 (-1.34,4.57) ⊕○○○ very low      |
| RMMH vs MLR  |                                      |                               |  | 1.08 (-0.79,2.95) ⊕○○○ very low      |
| RMMH vs SHT  |                                      |                               |  | 1.38 (-0.73,3.49) ⊕○○○ very low      |
| DMMH vs EMG  |                                      |                               |  | 0.14 (-1.52,1.80) ⊕○○○ very low      |
| DMMH vs MHRP |                                      |                               |  | 0.15 (-1.48,1.78) ⊕○○○ very low      |
| DMMH vs MEPR |                                      |                               |  | 0.15 (-1.53,1.83) ⊕○○○ very low      |
| DMMH vs MHR  |                                      |                               |  | 0.21 (-1.43,1.84) ⊕○○○ very low      |
| DMMH vs MHM  | 0.37 (-1.78,1.04) ⊕⊕○○ low           | -1.46 (1533.20) ⊕○○○ very low |  | 0.37 (-1.08,1.82) ⊕⊕○○ low           |

|              |                                      |                      |                                      |
|--------------|--------------------------------------|----------------------|--------------------------------------|
| DMMH vs SLT  |                                      |                      | 0.74 (-1.13,2.60) ⊕○○○ very low      |
| DMMH vs EHM  |                                      |                      | 0.76 (-1.09,2.62) ⊕○○○ very low      |
| DMMH vs MLPR |                                      |                      | 0.67 (-1.01,2.35) ⊕○○○ very low      |
| DMMH vs SMD  |                                      |                      | 0.97 (-1.55,3.50) ⊕○○○ very low      |
| DMMH vs Pla  |                                      |                      | 0.87 (-0.71,2.45) ⊕○○○ very low      |
| DMMH vs MMG  |                                      |                      | 1.57 (-1.30,4.44) ⊕○○○ very low      |
| DMMH vs MLR  |                                      |                      | 1.04 (-0.69,2.77) ⊕○○○ very low      |
| DMMH vs SHT  |                                      |                      | 1.34 (-0.65,3.33) ⊕○○○ very low      |
| EMG vs MHPR  |                                      |                      | 0.02 (-0.64,0.67) ⊕⊕○○ low           |
| EMG vs MEPR  |                                      |                      | 0.01 (-0.76,0.78) ⊕⊕○○ low           |
| EMG vs MHR   |                                      |                      | 0.07 (-0.60,0.74) ⊕⊕○○ low           |
| EMG vs MHM   |                                      |                      | 0.23 (-0.58,1.04) ⊕⊕○○ low           |
| EMG vs SLT   |                                      |                      | 0.60 (-0.52,1.72) ⊕○○○ very low      |
| EMG vs EHM   |                                      |                      | 0.62 (-0.48,1.72) ⊕○○○ very low      |
| EMG vs MLPR  |                                      |                      | 0.53 (-0.24,1.30) ⊕⊕○○ low           |
| EMG vs SMD   |                                      |                      | 0.83 (-1.20,2.87) ⊕○○○ very low      |
| EMG vs Pla   | <b>*0.73 (0.34,1.13)</b> ⊕⊕⊕○ medium |                      | <b>*0.73 (0.22,1.25)</b> ⊕⊕⊕○ medium |
| EMG vs MMG   |                                      |                      | 1.43 (-1.01,3.88) ⊕○○○ very low      |
| EMG vs MLR   |                                      |                      | <b>*0.90 (0.03,1.78)</b> ⊕⊕⊕○ medium |
| EMG vs SHT   |                                      |                      | 1.20 (-0.11,2.52) ⊕○○○ very low      |
| MHPR vs MEPR | 0.20 (-0.34,0.74) ⊕⊕○○ low           | 0.83 (0.58) ⊕⊕○○ low | -0.01 (-0.57,0.56) ⊕⊕⊕○ medium       |
| MHPR vs MHR  | 0.21 (-0.18,0.59) ⊕⊕○○ low           | 0.70 (0.44) ⊕⊕○○ low | 0.05 (-0.36,0.46) ⊕⊕⊕○ medium        |
| MHPR vs MHM  |                                      |                      | 0.22 (-0.53,0.96) ⊕⊕○○ low           |
| MHPR vs SLT  |                                      |                      | 0.58 (-0.49,1.65) ⊕○○○ very low      |
| MHPR vs EHM  |                                      |                      | 0.61 (-0.45,1.66) ⊕○○○ very low      |

|              |                                      |                       |                                      |
|--------------|--------------------------------------|-----------------------|--------------------------------------|
| MHPR vs MLPR | 0.30 (-0.23,0.83) ⊕⊕○○ low           | -1.82 (0.65) ⊕⊕○○ low | 0.51 (-0.07,1.09) ⊕⊕⊕○ medium        |
| MHPR vs SMD  |                                      |                       | 0.82 (-1.19,2.83) ⊕○○○ very low      |
| MHPR vs Pla  | 0.69 (-0.09,1.48) ⊕⊕○○ low           | 0.95 (0.54) ⊕⊕○○ low  | <b>*0.72 (0.31,1.12)</b> ⊕⊕⊕○ medium |
| MHPR vs MMG  |                                      |                       | 1.42 (-1.01,3.84) ⊕○○○ very low      |
| MHPR vs MLR  |                                      |                       | <b>*0.89 (0.14,1.64)</b> ⊕⊕⊕○ medium |
| MHPR vs SHT  |                                      |                       | 1.19 (-0.09,2.46) ⊕○○○ very low      |
| MEPR vs MHR  | 0.10 (-0.43,0.63) ⊕⊕○○ low           | -0.14 (0.72) ⊕⊕○○ low | 0.06 (-0.51,0.63) ⊕⊕⊕○ medium        |
| MEPR vs MHM  |                                      |                       | 0.22 (-0.63,1.08) ⊕⊕○○ low           |
| MEPR vs SLT  |                                      |                       | 0.59 (-0.56,1.74) ⊕○○○ very low      |
| MEPR vs EHM  |                                      |                       | 0.62 (-0.51,1.74) ⊕○○○ very low      |
| MEPR vs MLPR |                                      |                       | 0.52 (-0.24,1.28) ⊕⊕○○ low           |
| MEPR vs SMD  |                                      |                       | 0.83 (-1.23,2.88) ⊕○○○ very low      |
| MEPR vs Pla  | <b>*0.90 (0.35,1.45)</b> ⊕⊕⊕○ medium | 0.63 (0.93) ⊕⊕○○ low  | <b>*0.73 (0.15,1.30)</b> ⊕⊕⊕○ medium |
| MEPR vs MMG  |                                      |                       | 1.43 (-1.04,3.89) ⊕○○○ very low      |
| MEPR vs MLR  |                                      |                       | <b>*0.90 (0.04,1.75)</b> ⊕⊕⊕○ medium |
| MEPR vs SHT  |                                      |                       | 1.19 (-0.15,2.53) ⊕○○○ very low      |
| MHR vs MHM   |                                      |                       | 0.16 (-0.60,0.93) ⊕⊕○○ low           |
| MHR vs SLT   |                                      |                       | 0.53 (-0.55,1.61) ⊕○○○ very low      |
| MHR vs EHM   |                                      |                       | 0.56 (-0.51,1.62) ⊕○○○ very low      |
| MHR vs MLPR  |                                      |                       | 0.46 (-0.20,1.12) ⊕⊕○○ low           |
| MHR vs SMD   |                                      |                       | 0.77 (-1.25,2.78) ⊕○○○ very low      |
| MHR vs Pla   | <b>*0.83 (0.39,1.26)</b> ⊕⊕⊕○ medium | 0.43 (0.65) ⊕⊕○○ low  | <b>*0.67 (0.23,1.10)</b> ⊕⊕⊕○ medium |
| MHR vs MMG   |                                      |                       | 1.37 (-1.07,3.80) ⊕○○○ very low      |
| MHR vs MLR   | <b>*0.94 (0.24,1.64)</b> ⊕⊕⊕○ medium | 0.34 (0.90) ⊕⊕○○ low  | <b>*0.84 (0.14,1.54)</b> ⊕⊕⊕○ medium |
| MHR vs SHT   |                                      |                       | 1.13 (-0.15,2.42) ⊕○○○ very low      |

|             |                            |                       |                                  |
|-------------|----------------------------|-----------------------|----------------------------------|
| MHM vs SLT  |                            |                       | 0.37 (-0.81,1.54) ⊕○○○ very low  |
| MHM vs EHM  |                            |                       | 0.39 (-0.77,1.55) ⊕○○○ very low  |
| MHM vs MLPR |                            |                       | 0.30 (-0.56,1.15) ⊕○○○ very low  |
| MHM vs SMD  |                            |                       | 0.60 (-1.47,2.67) ⊕○○○ very low  |
| MHM vs Pla  | 0.33 (-0.31,0.97) ⊕⊕○○ low | 1.45 (0.83) ⊕⊕○○ low  | 0.50 (-0.13,1.13) ⊕⊕⊕○ medium    |
| MHM vs MMG  |                            |                       | 1.20 (-1.27,3.68) ⊕○○○ very low  |
| MHM vs MLR  |                            |                       | 0.67 (-0.27,1.62) ⊕⊕○○ low       |
| MHM vs SHT  |                            |                       | 0.97 (-0.40,2.33) ⊕○○○ very low  |
| SLT vs EHM  |                            |                       | 0.03 (-1.37,1.42) ⊕○○○ very low  |
| SLT vs MLPR |                            |                       | -0.07 (-1.22,1.08) ⊕○○○ very low |
| SLT vs SMD  |                            |                       | 0.24 (-1.97,2.44) ⊕○○○ very low  |
| SLT vs Pla  | 0.13 (-0.83,1.08) ⊕⊕○○ low |                       | 0.14 (-0.86,1.13) ⊕⊕⊕○ medium    |
| SLT vs MMG  |                            |                       | 0.84 (-1.76,3.43) ⊕○○○ very low  |
| SLT vs MLR  |                            |                       | 0.31 (-0.91,1.53) ⊕○○○ very low  |
| SLT vs SHT  | 0.53 (-0.67,1.73) ⊕⊕○○ low | -2.15 (2.60) ⊕⊕○○ low | 0.60 (-0.61,1.82) ⊕⊕○○ low       |
| EHM vs MLPR |                            |                       | -0.09 (-1.23,1.04) ⊕○○○ very low |
| EHM vs SMD  |                            |                       | 0.21 (-1.99,2.41) ⊕○○○ very low  |
| EHM vs Pla  | 0.11 (-0.81,1.03) ⊕⊕○○ low |                       | 0.11 (-0.86,1.08) ⊕⊕⊕○ medium    |
| EHM vs MMG  |                            |                       | 0.81 (-1.77,3.39) ⊕○○○ very low  |
| EHM vs MLR  |                            |                       | 0.28 (-0.92,1.48) ⊕○○○ very low  |
| EHM vs SHT  |                            |                       | 0.58 (-0.97,2.13) ⊕○○○ very low  |
| MLPR vs SMD |                            |                       | 0.30 (-1.75,2.36) ⊕○○○ very low  |
| MLPR vs Pla | 0.00 (-0.52,0.52) ⊕⊕○○ low | 0.66 (-1.52) ⊕⊕○○ low | 0.20 (-0.37,0.78) ⊕⊕⊕○ medium    |
| MLPR vs MMG |                            |                       | 0.90 (-1.56,3.37) ⊕○○○ very low  |
| MLPR vs MLR |                            |                       | 0.38 (-0.51,1.26) ⊕○○○ very low  |



|             |                             |                       |                                  |
|-------------|-----------------------------|-----------------------|----------------------------------|
| MLPR vs SHT |                             |                       | 0.67 (-0.67,2.01) ⊕○○○ very low  |
| SMD vs Pla  | -0.10 (-2.04,1.84) ⊕⊕○○ low |                       | -0.10 (-2.07,1.87) ⊕⊕○○ low      |
| SMD vs MMG  |                             |                       | 0.60 (-2.50,3.70) ⊕○○○ very low  |
| SMD vs MLR  |                             |                       | 0.07 (-2.02,2.16) ⊕○○○ very low  |
| SMD vs SHT  |                             |                       | 0.37 (-1.94,2.68) ⊕○○○ very low  |
| Pla vs MMG  | 0.70 (-1.67,3.07) ⊕⊕○○ low  |                       | 0.70 (-1.69,3.09) ⊕⊕○○ low       |
| Pla vs MLR  | 0.06 (-0.66,0.78) ⊕⊕○○ low  | -0.66 (0.89) ⊕⊕○○ low | 0.17 (-0.53,0.88) ⊕⊕○○ medium    |
| Pla vs SHT  | 0.54 (-0.65,1.73) ⊕⊕○○ low  | 1.08 (2.60) ⊕⊕○○ low  | 0.47 (-0.74,1.68) ⊕⊕○○ low       |
| MMG vs MLR  |                             |                       | -0.53 (-3.02,1.97) ⊕○○○ very low |
| MMG vs SHT  |                             |                       | -0.23 (-2.91,2.45) ⊕○○○ very low |
| MLR vs SHT  |                             |                       | 0.30 (-1.10,1.70) ⊕○○○ very low  |

We followed the article in BMJ [1] and previous network meta-analysis [2] for quality assessment

#### References:

- [1] Puhan, M.A.; Schunemann, H.J.; Murad, M.H.; Li, T.; Brignardello-Petersen, R.; Singh, J.A.; Kessels, A.G.; Guyatt, G.H.; Group, G.W. A GRADE Working Group approach for rating the quality of treatment effect estimates from network meta-analysis. *BMJ*, **2014**, *349*, g5630.
- [2] Cipriani, A.; Furukawa, T.A.; Salanti, G.; Chaimani, A.; Atkinson, L.Z.; Ogawa, Y.; Leucht, S.; Ruhe, H.G.; Turner, E.H.; Higgins, J.P.T.; Egger, M.; Takeshima, N.; Hayasaka, Y.; Imai, H.; Shinohara, K.; Tajika, A.; Ioannidis, J.P.A.; Geddes, J.R. Comparative efficacy and acceptability of 21 antidepressant drugs for the acute treatment of adults with major depressive disorder: a systematic review and network meta-analysis. *Lancet*, **2018**.
